# Supplementary material for: The relative contribution of DNA methylation and genetic variants on protein biomarkers for human diseases
Source: PLOS journal article supplement (doi:10.1371/journal.pgen.1007005), 2017-09-15

**Supplemental Fig S4.** Manhattan plots for EWAS results when adjusted for independent GWAS SNPs. A total of 18 biomarkers with both EWAS and GWAS hits are included.

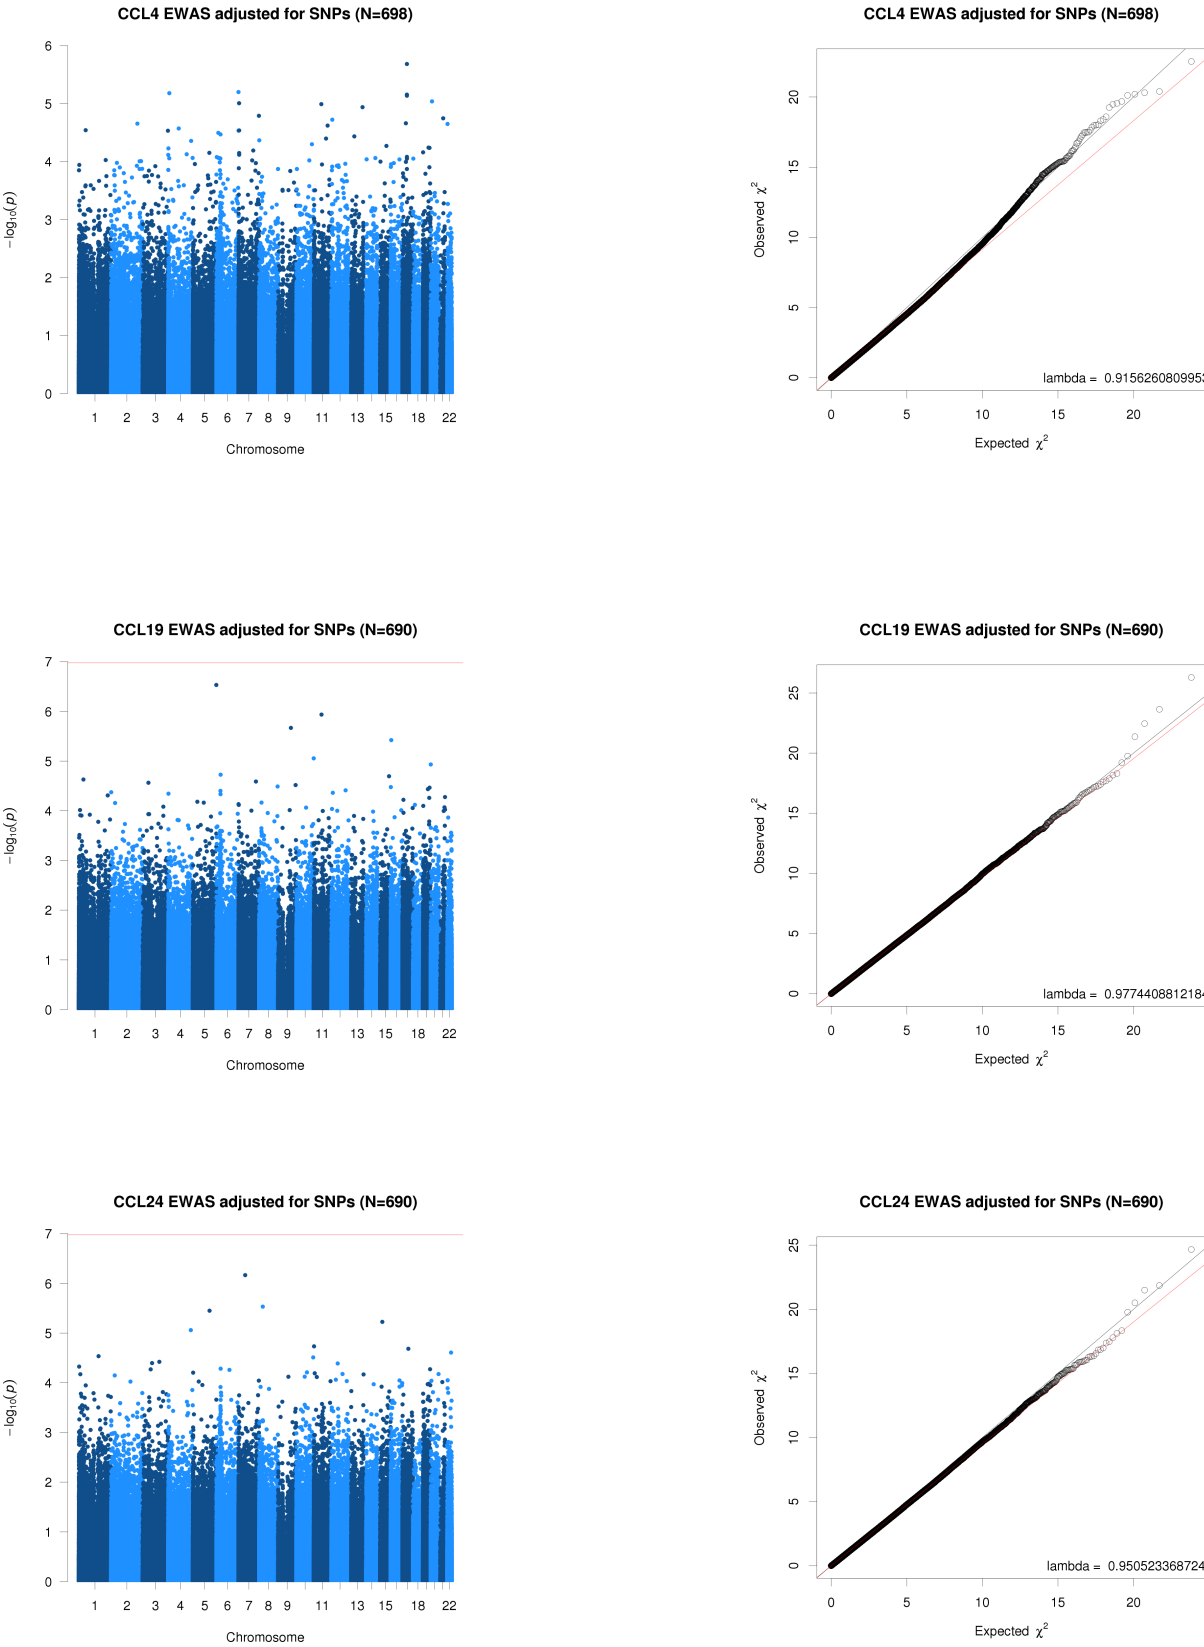

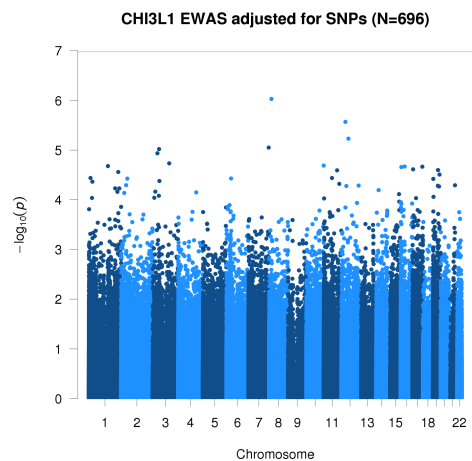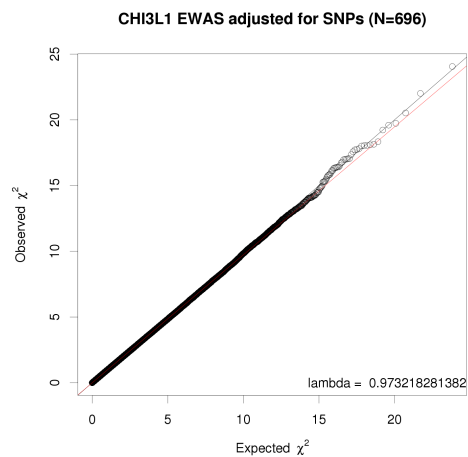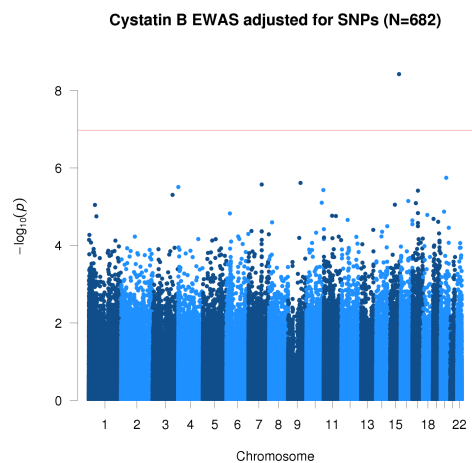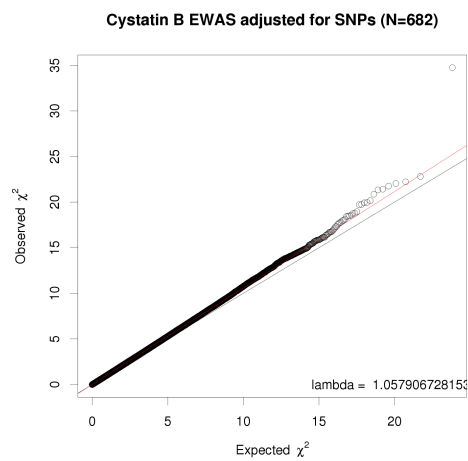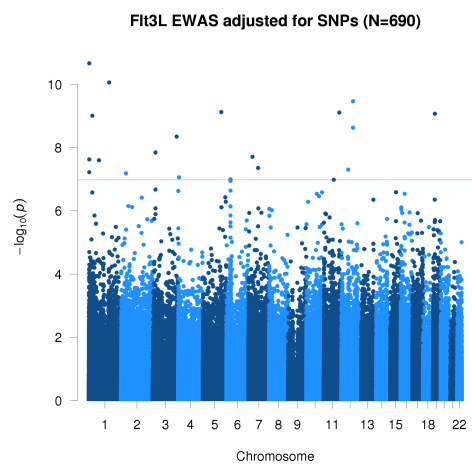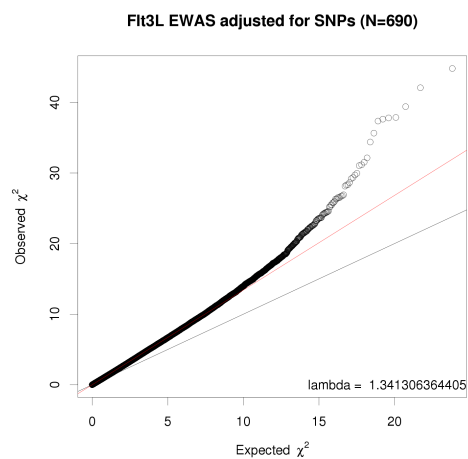

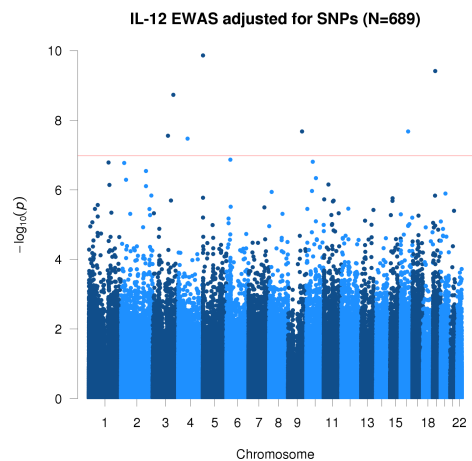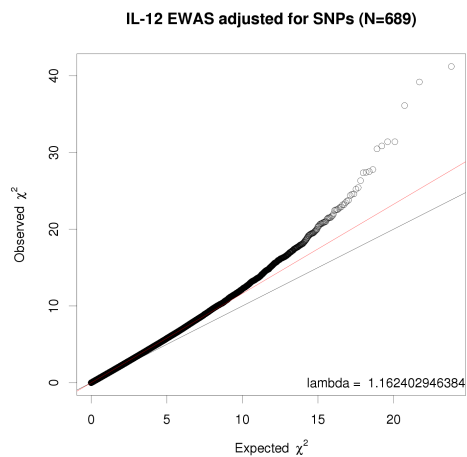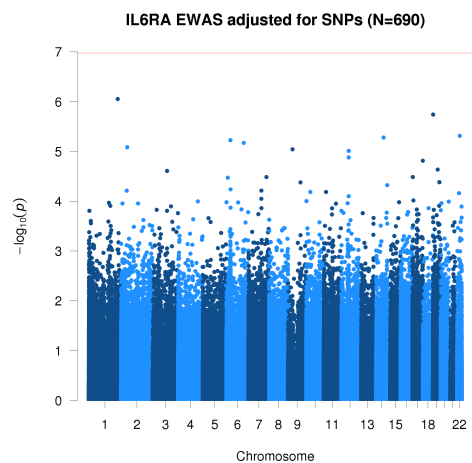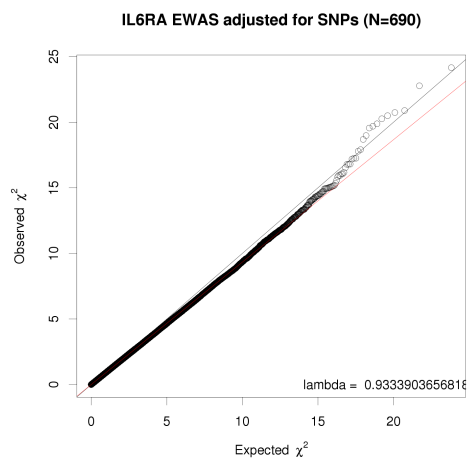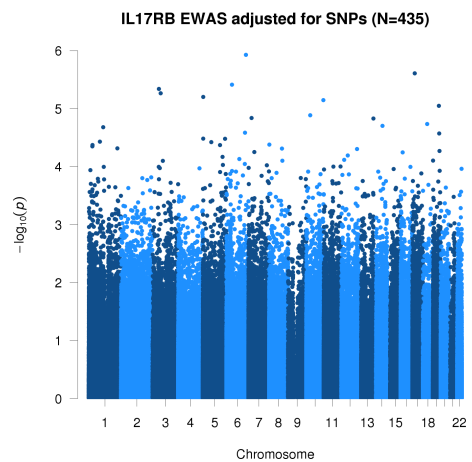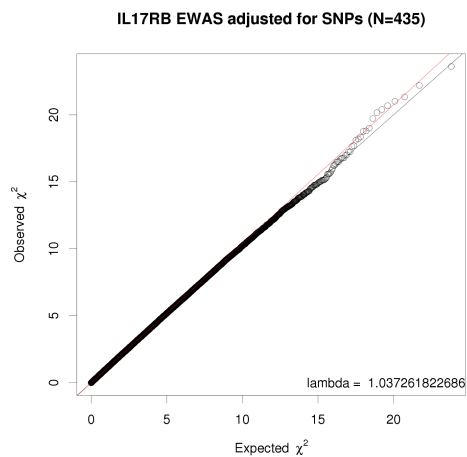

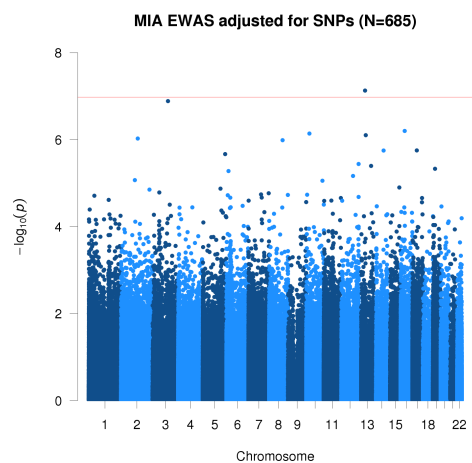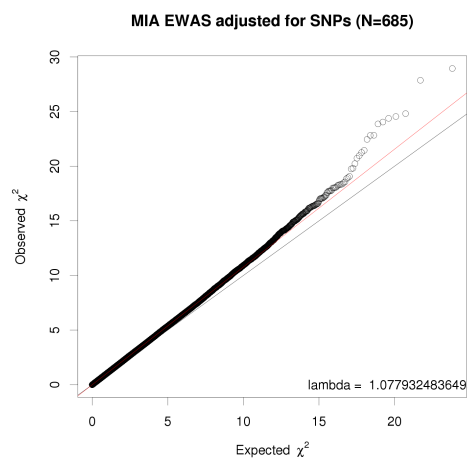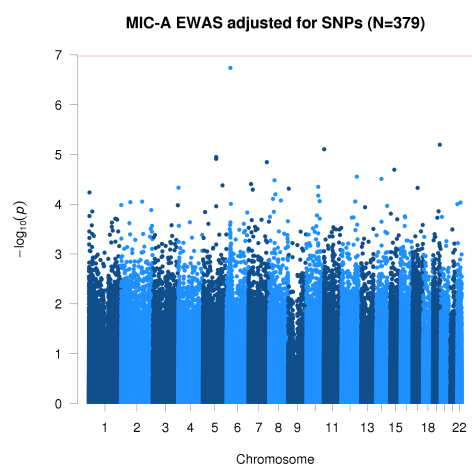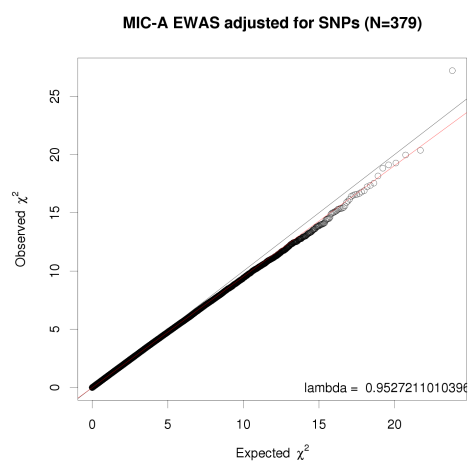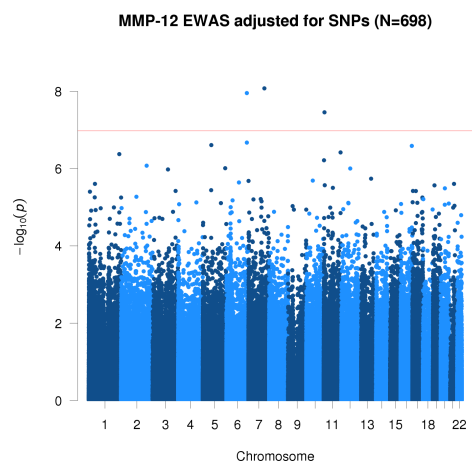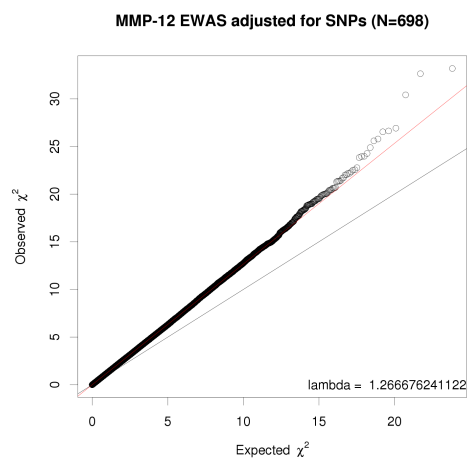

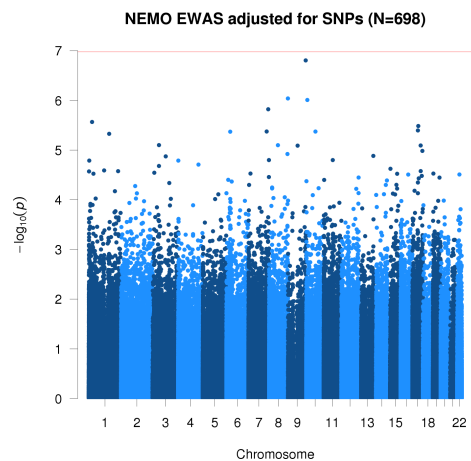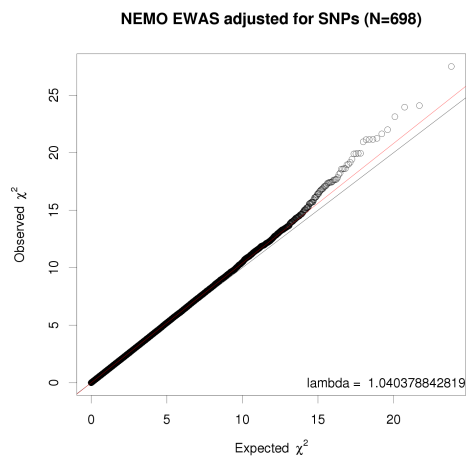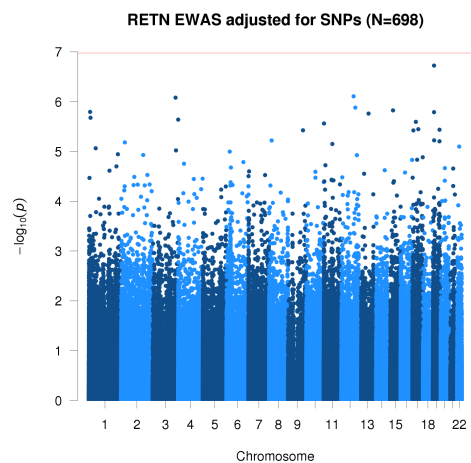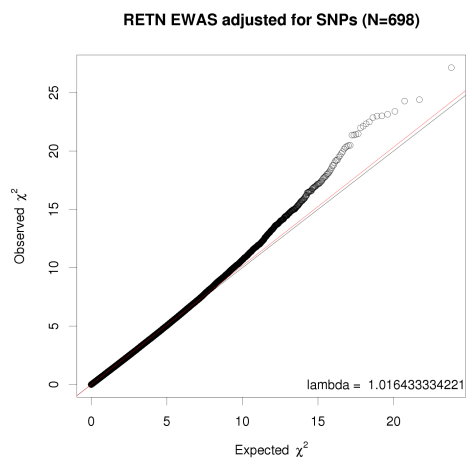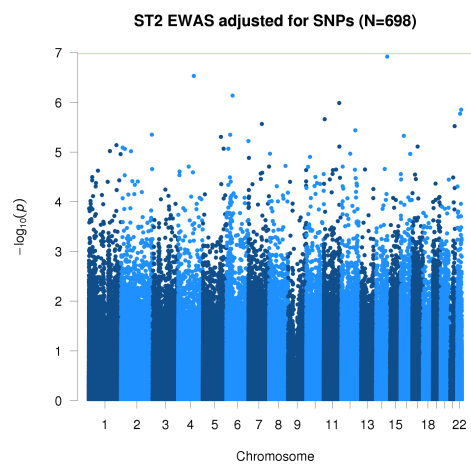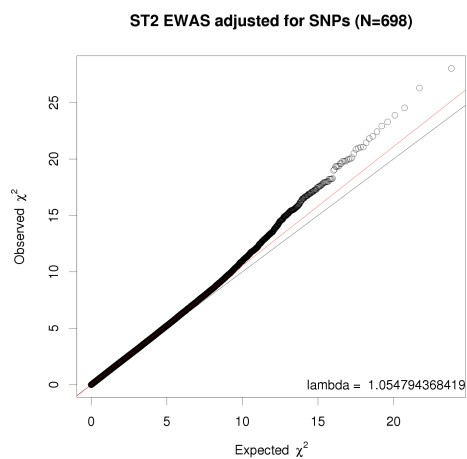

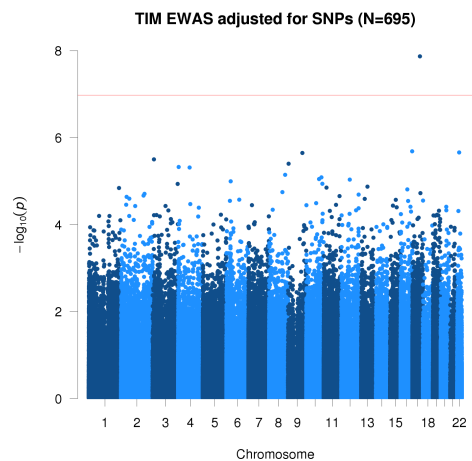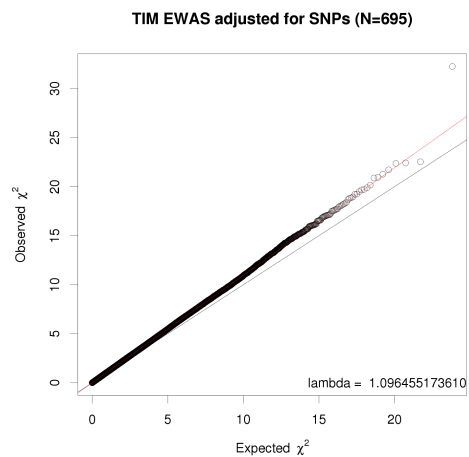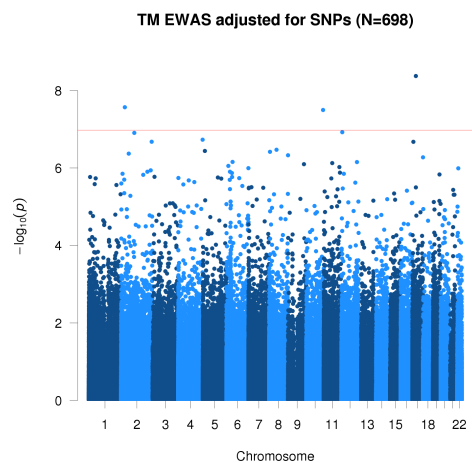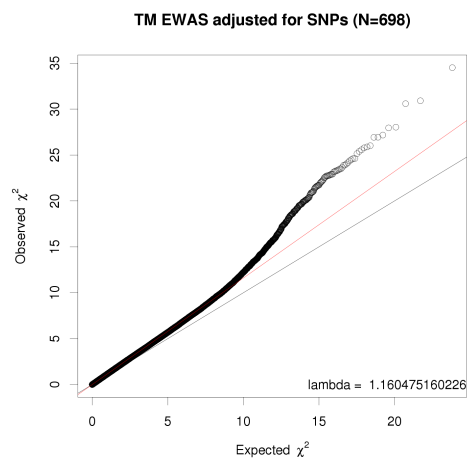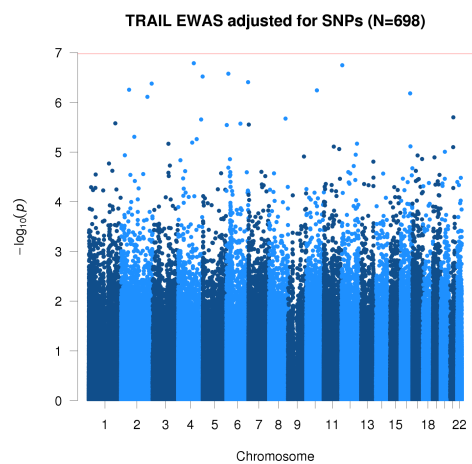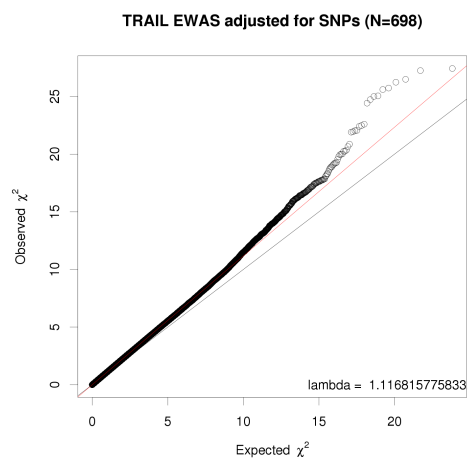

Supplement: S4 (10.1371/journal.pgen.1007005.s004) [file journal.pgen.1007005.s004]
