# Supplementary material for: The relative contribution of DNA methylation and genetic variants on protein biomarkers for human diseases
Source: PubMed Central journal article supplement (PMC5617224; doi:10.1371/journal.pgen.1007005), 2017-09-15

**Supplemental Fig S2. Manhattan plots and QQ plots for GWAS results for all analyzed biomarkers.**

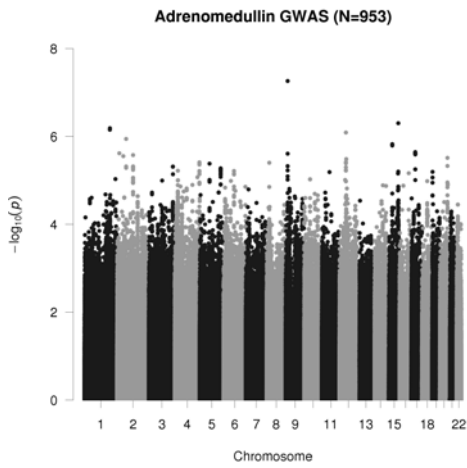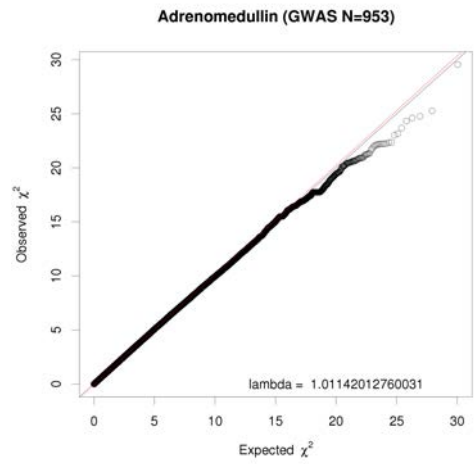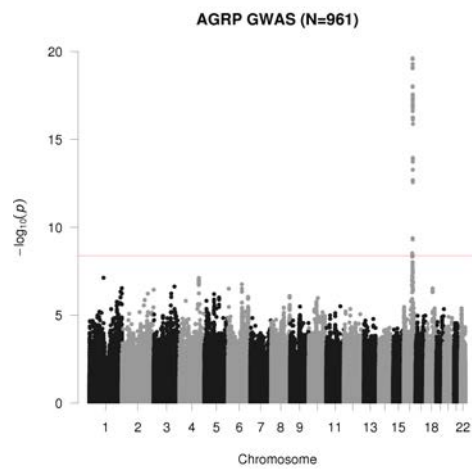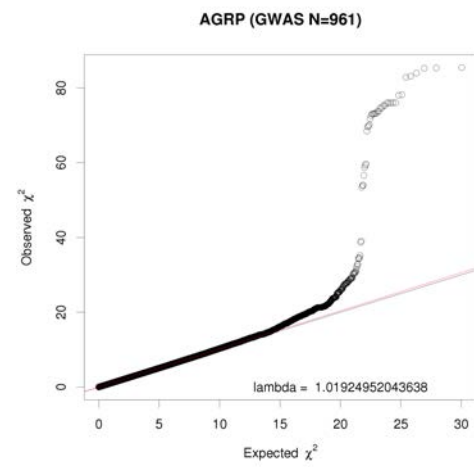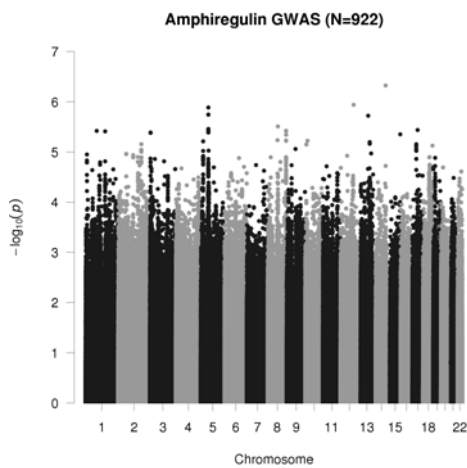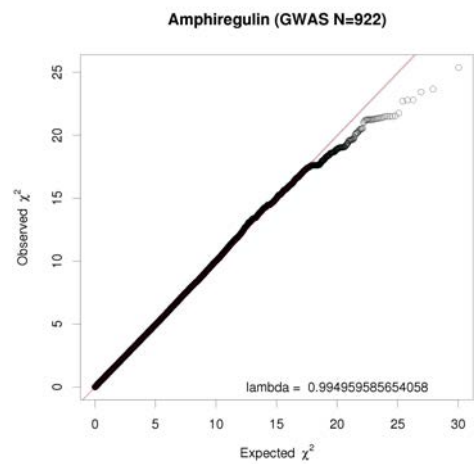

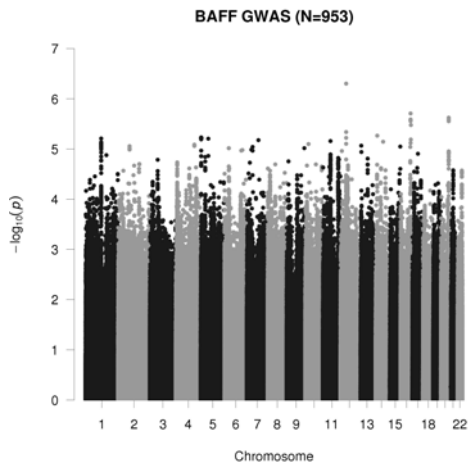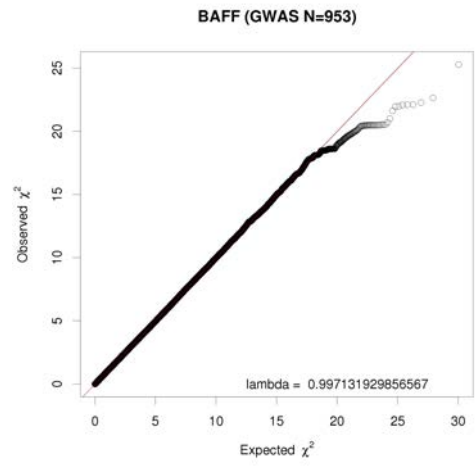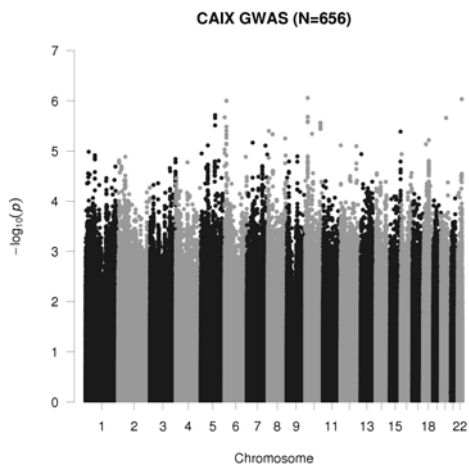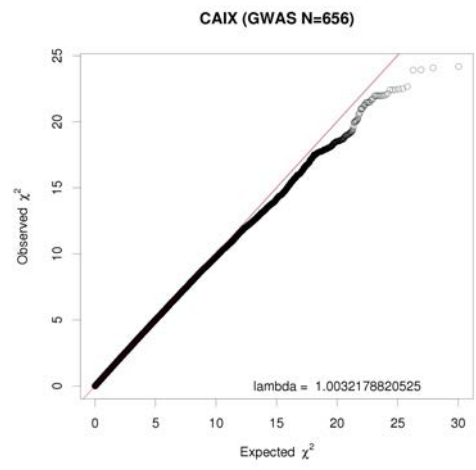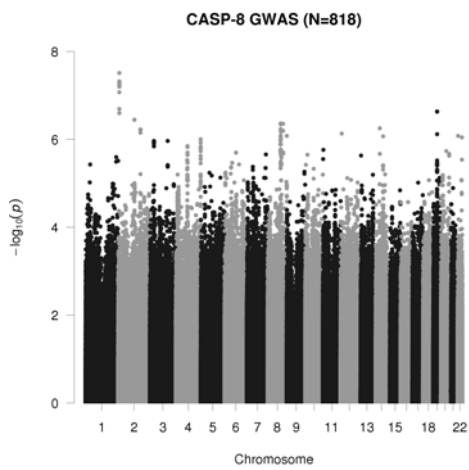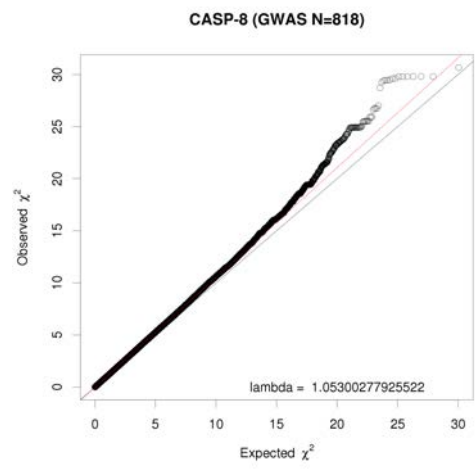

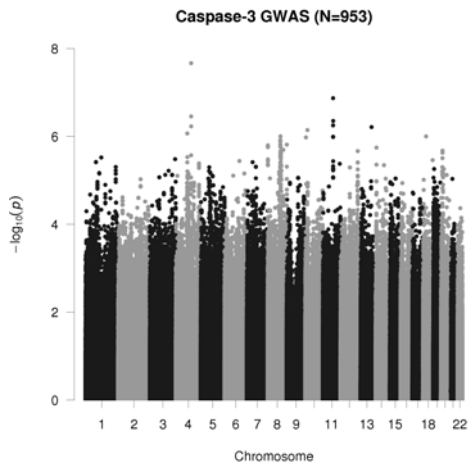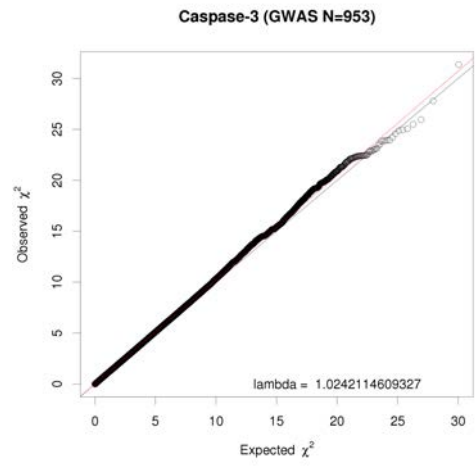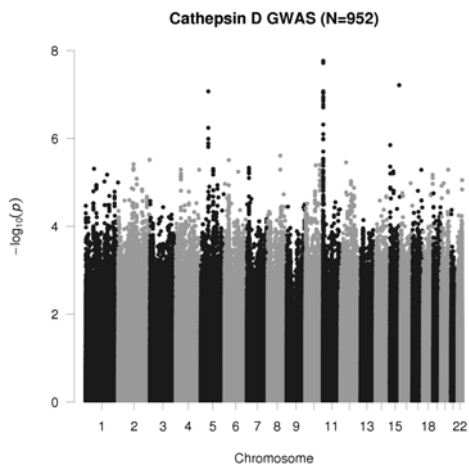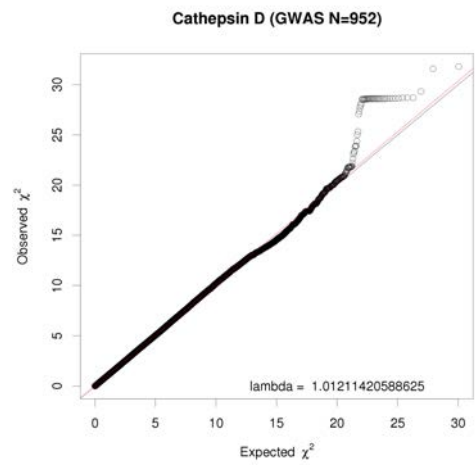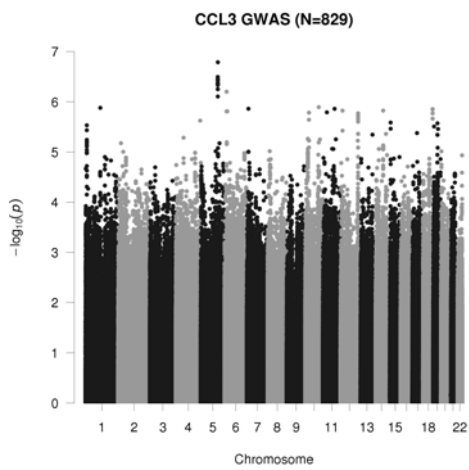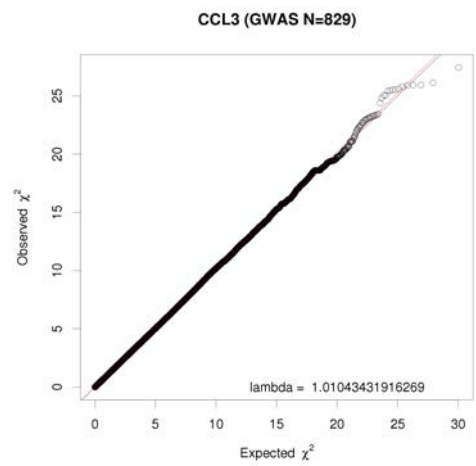

CCL4 GWAS (N=961)

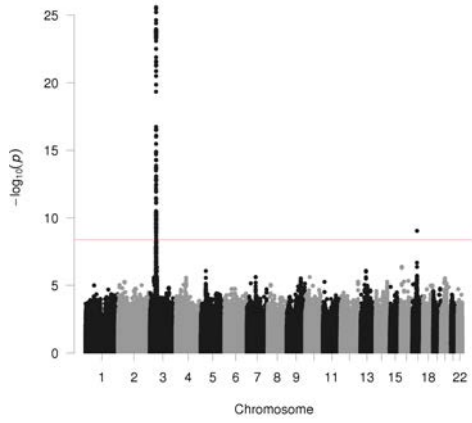

CCL4 (GWAS N=961)

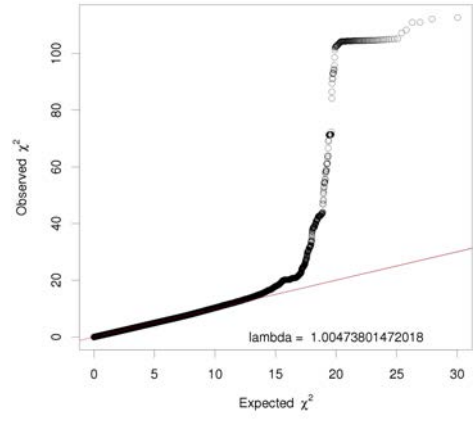

CCL9 GWAS (N=953)

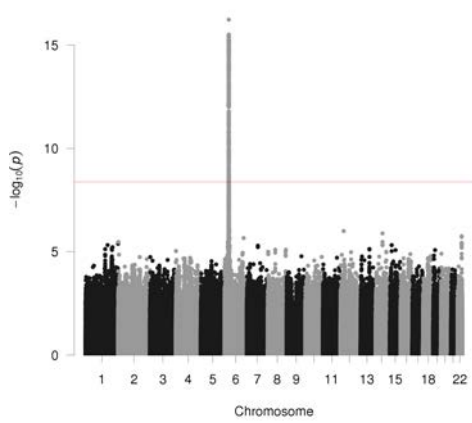

CCL9 (GWAS N=953)

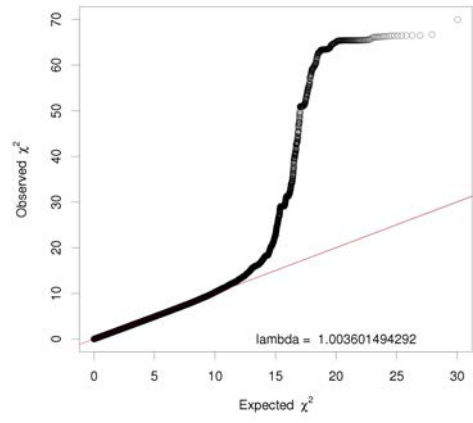

CCL20 GWAS (N=961)

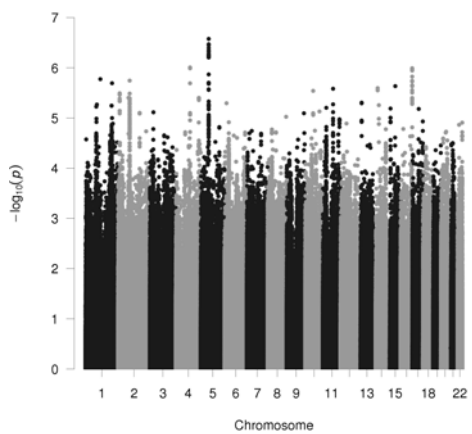

CCL20 (GWAS N=961)

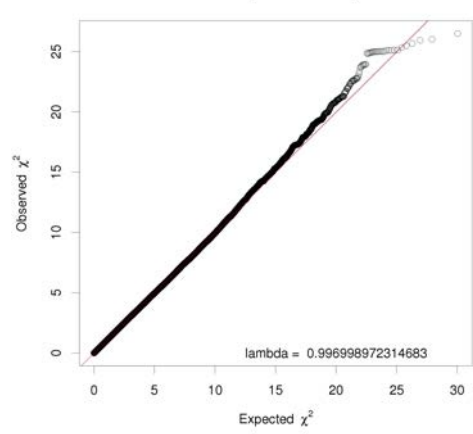

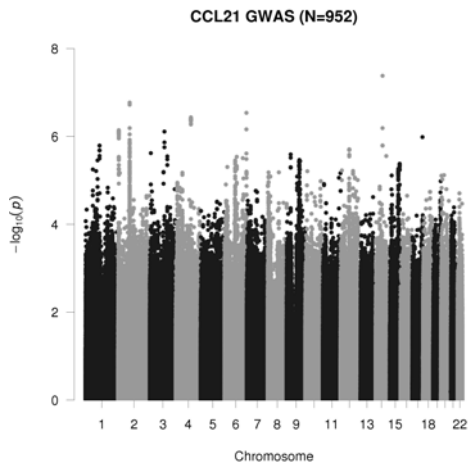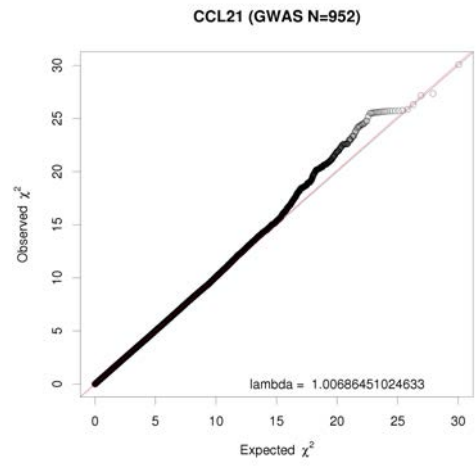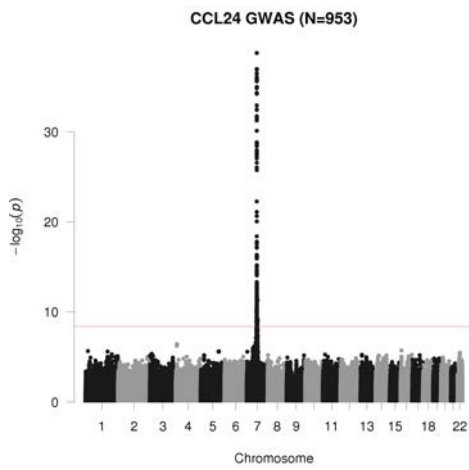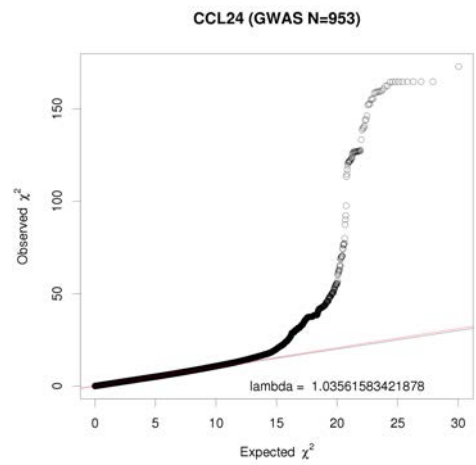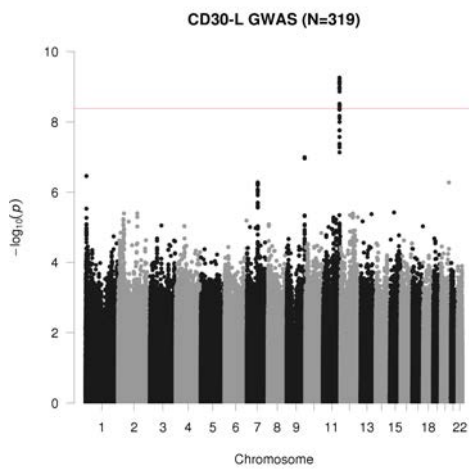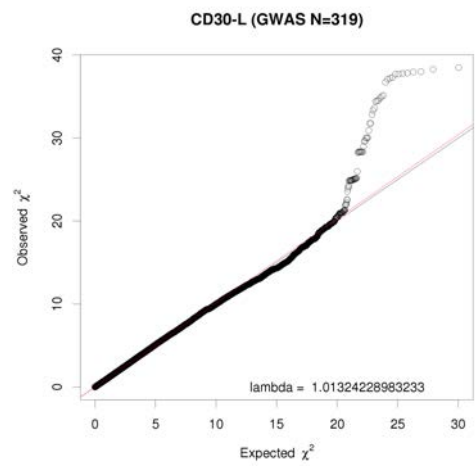

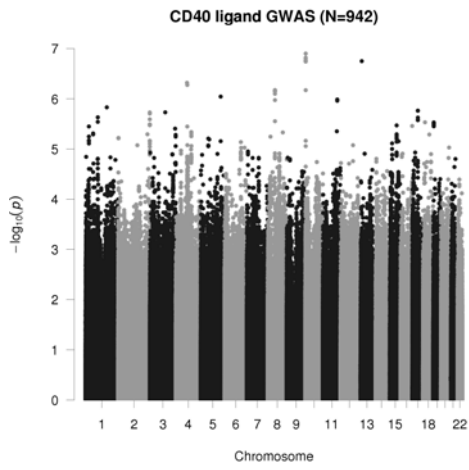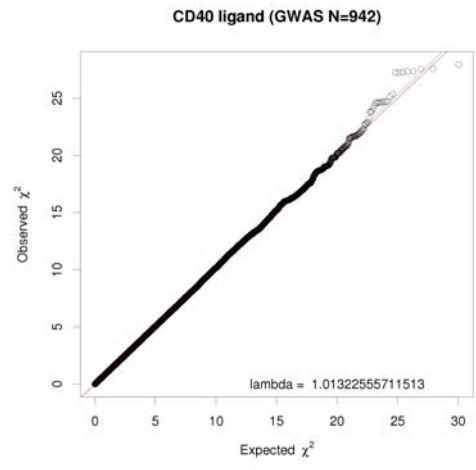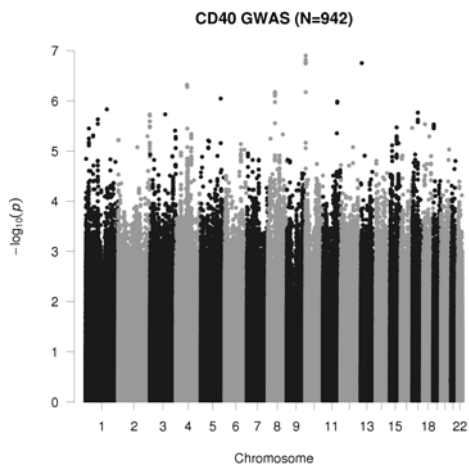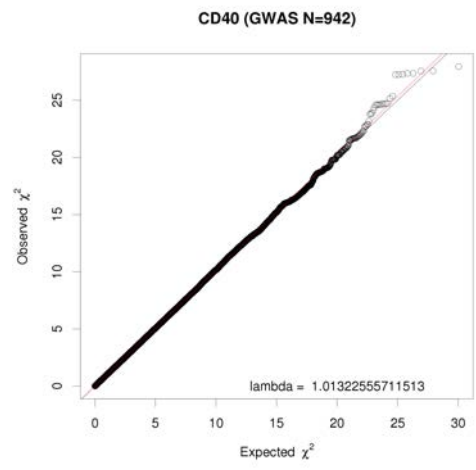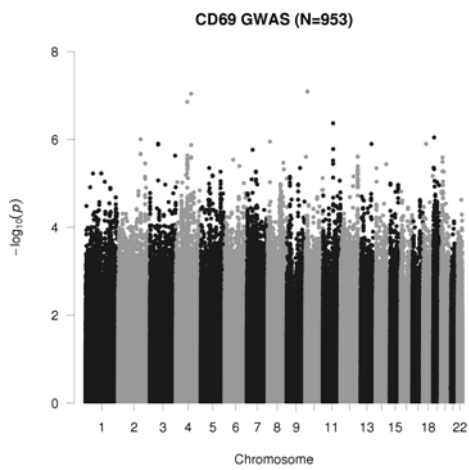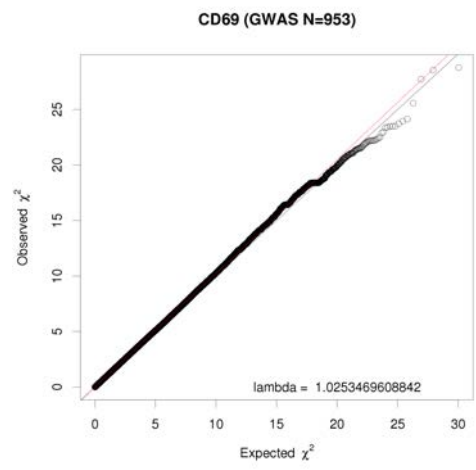

CHI3L1 GWAS (N=959)

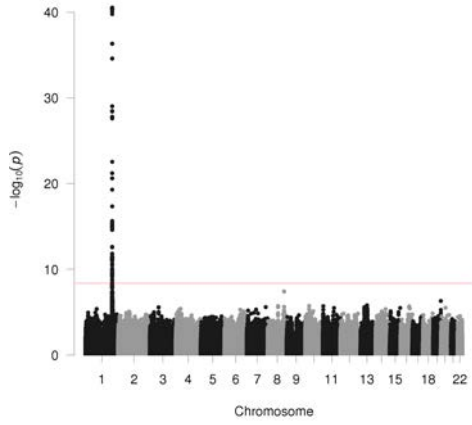

CHI3L1 (GWAS N=959)

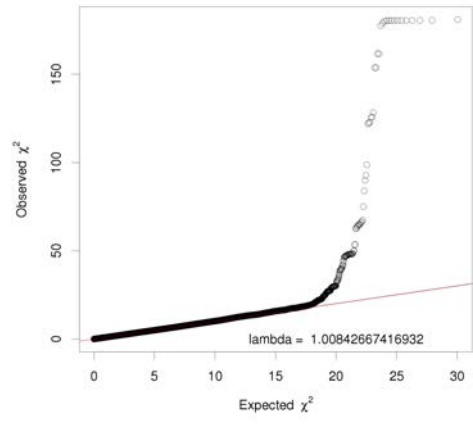

CSF-1 GWAS (N=953)

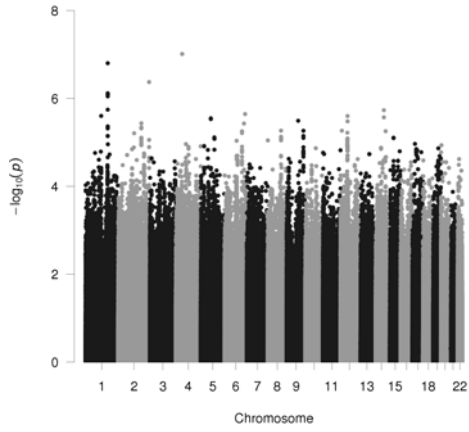

CSF-1 (GWAS N=953)

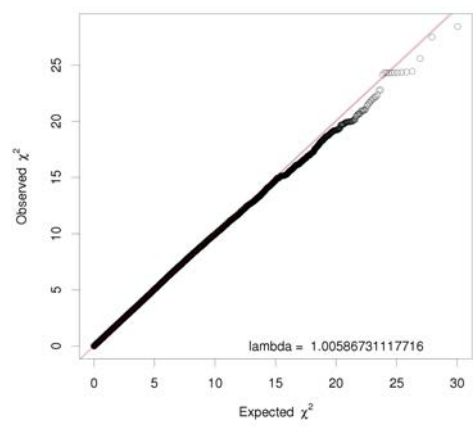

CSTB GWAS (N=961)

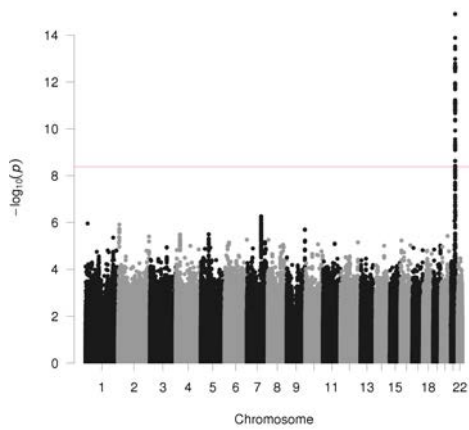

CSTB (GWAS N=961)

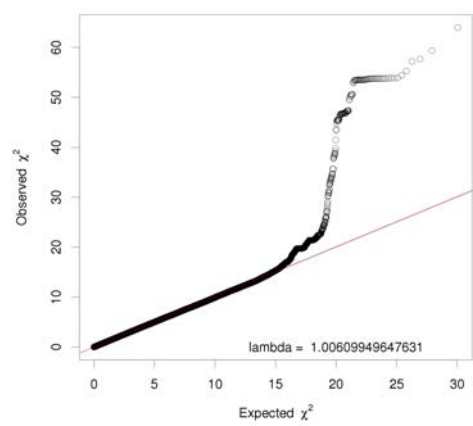

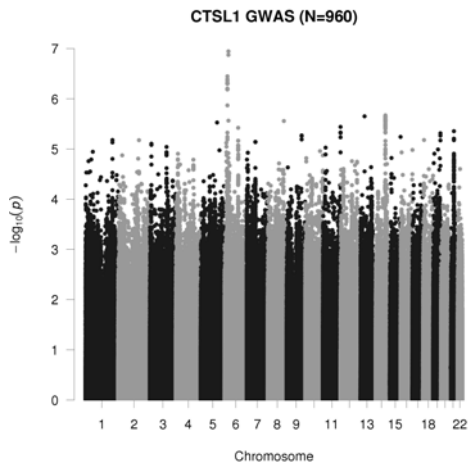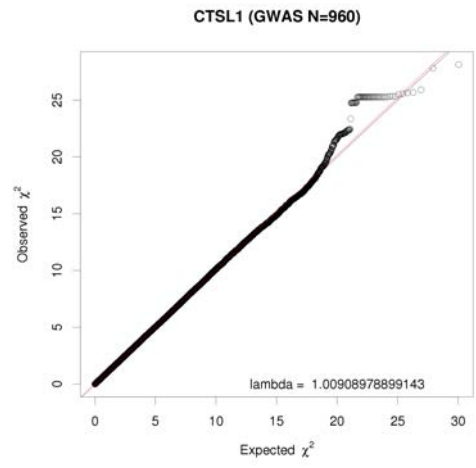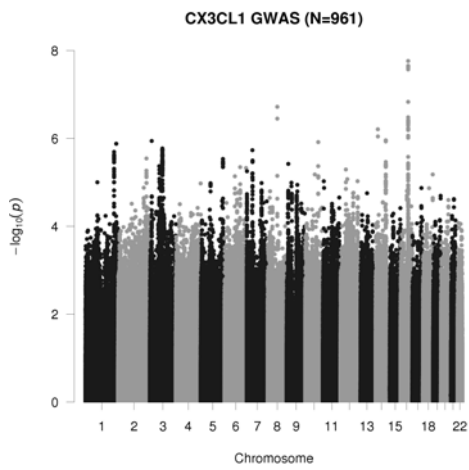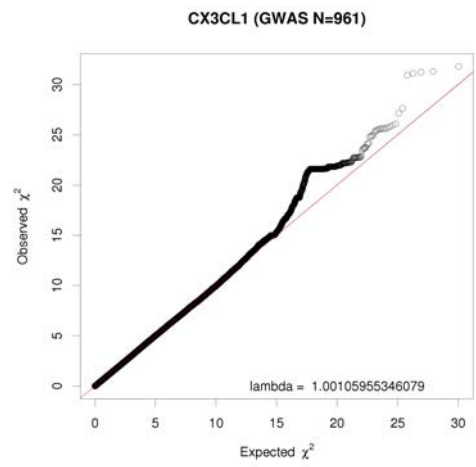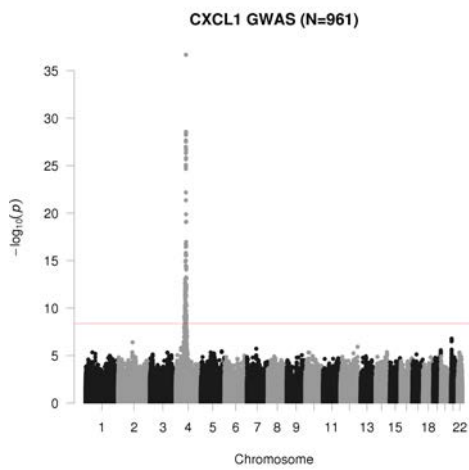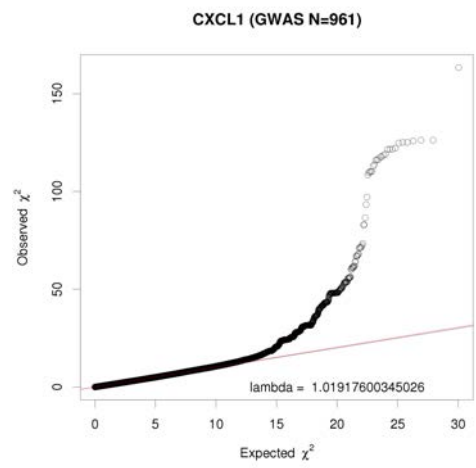



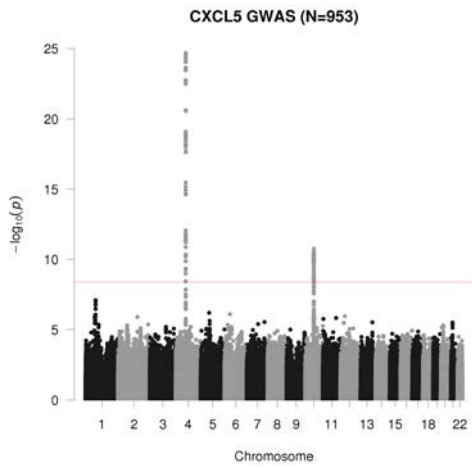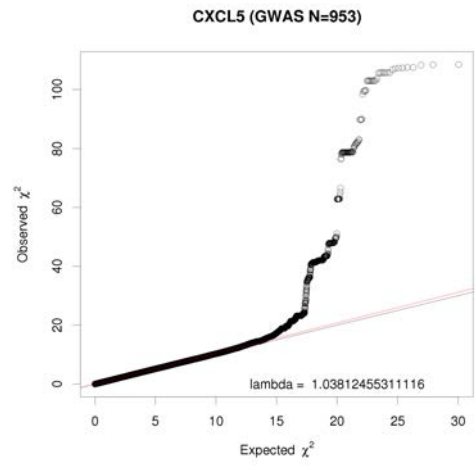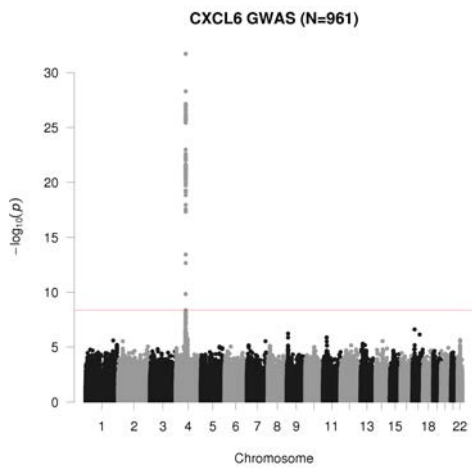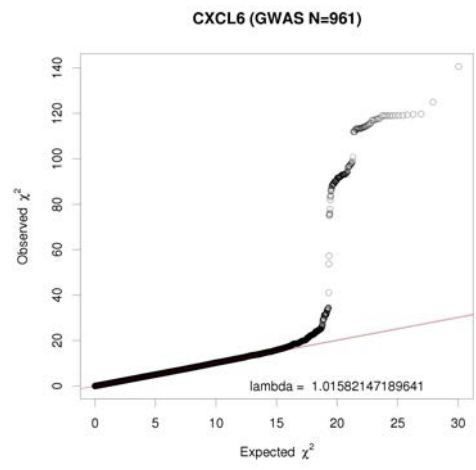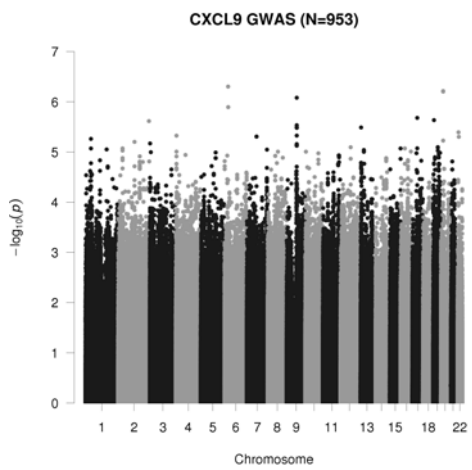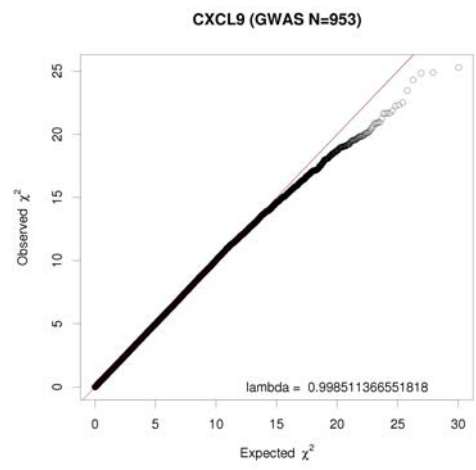

CXCL10 GWAS (N=953)

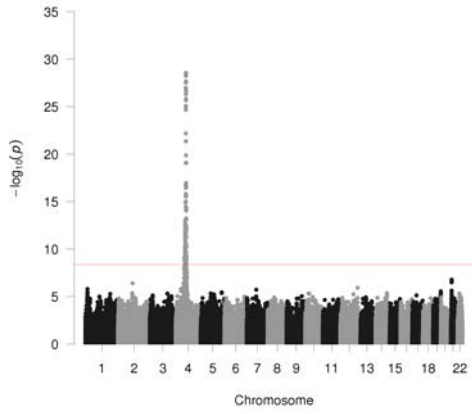

CXCL10 (GWAS N=953)

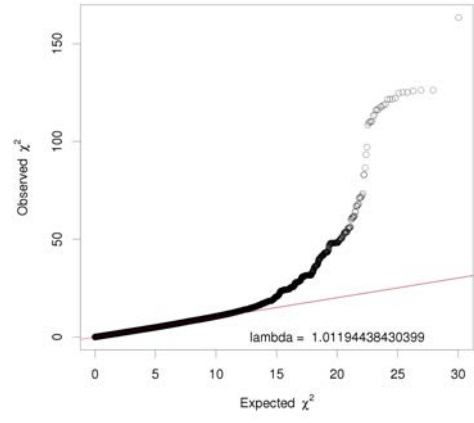

CXCL11 GWAS (N=953)

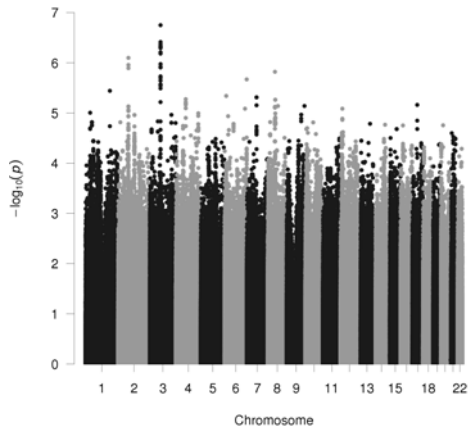

CXCL11 (GWAS N=953)

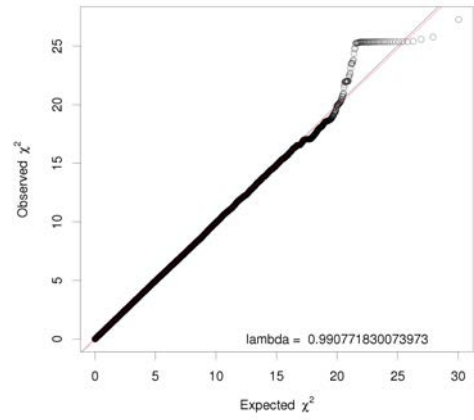

CXCL13 GWAS (N=953)

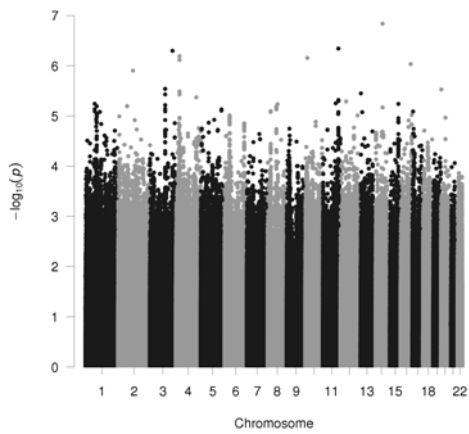

CXCL13 (GWAS N=953)

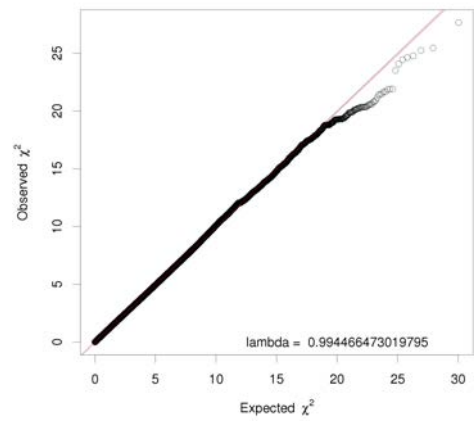

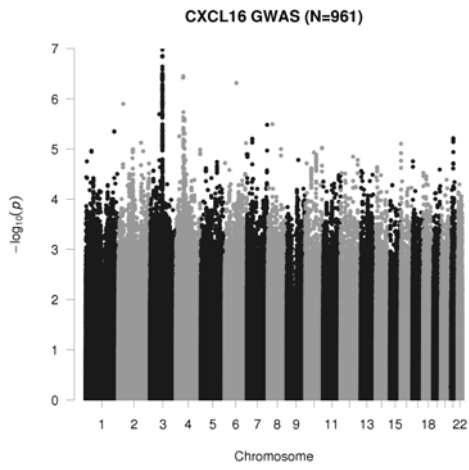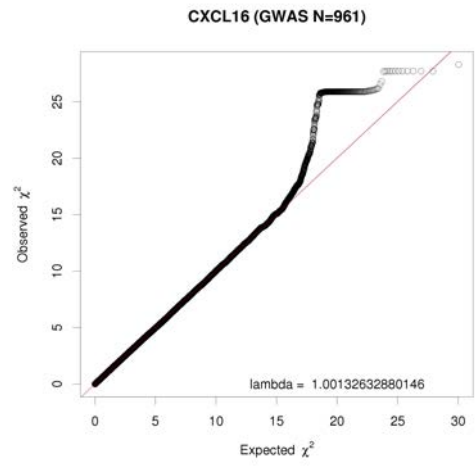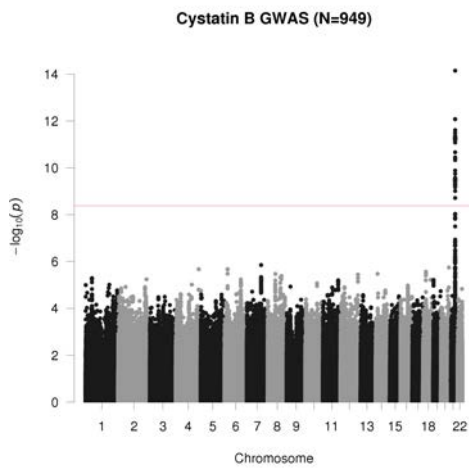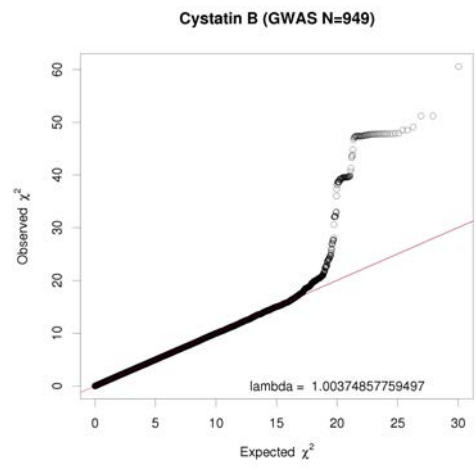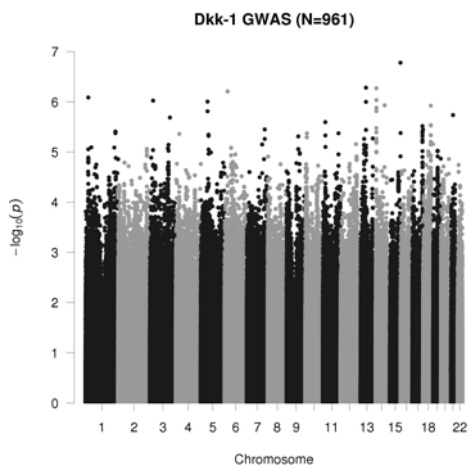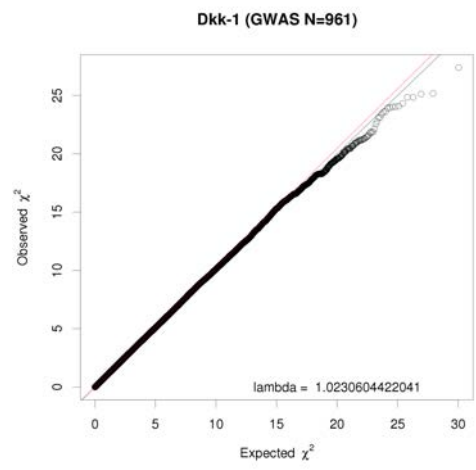

E-selectin GWAS (N=953)

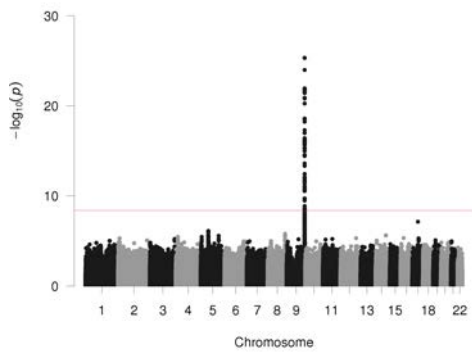

E-selectin (GWAS N=953)

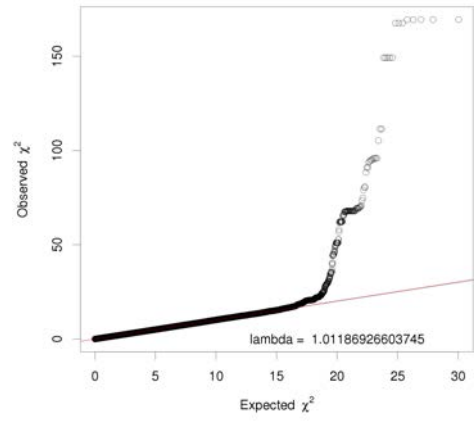

ECP GWAS (N=961)

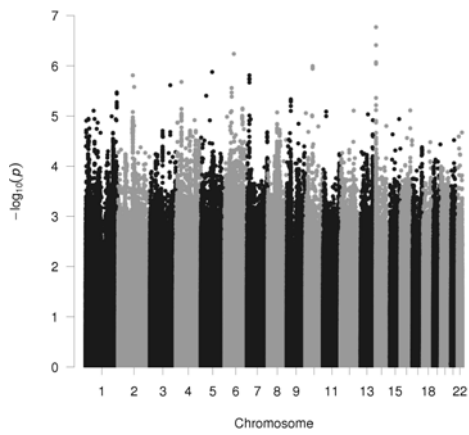

ECP (GWAS N=961)

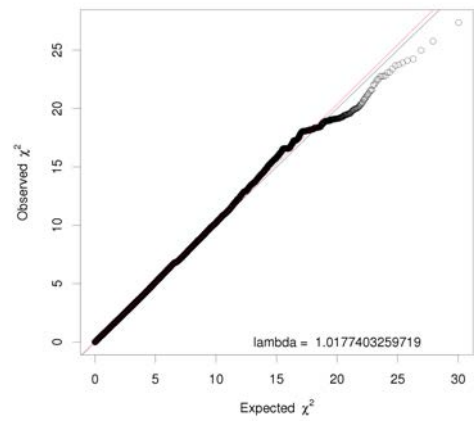

EGF GWAS (N=953)

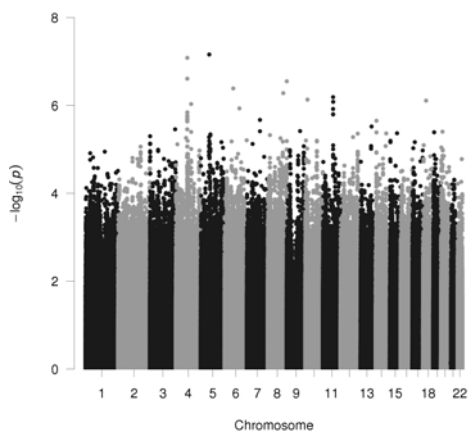

EGF (GWAS N=953)

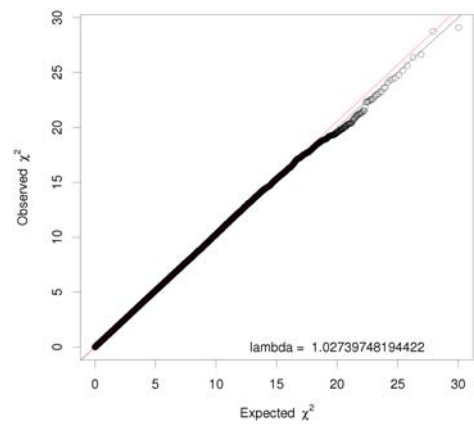

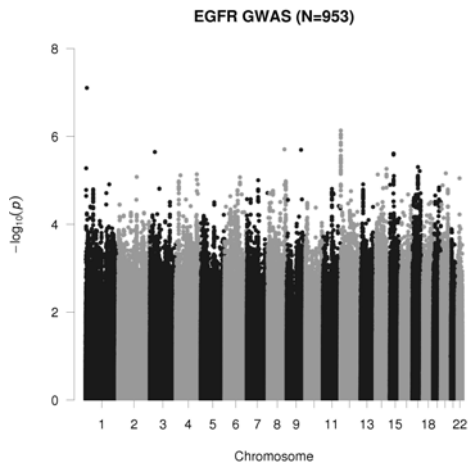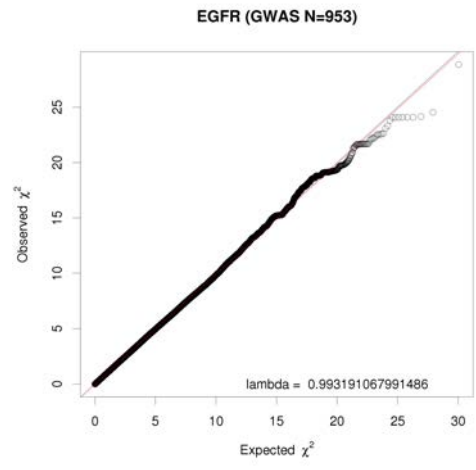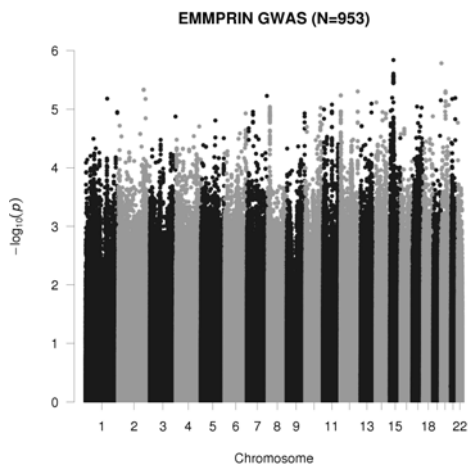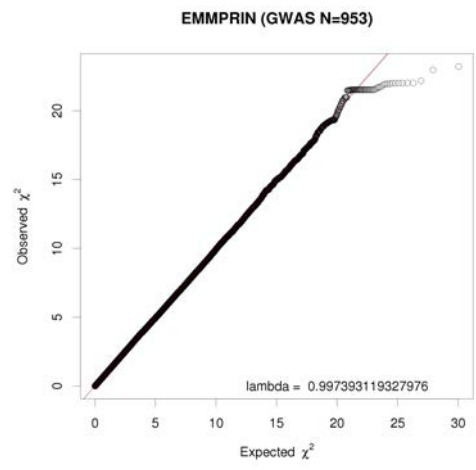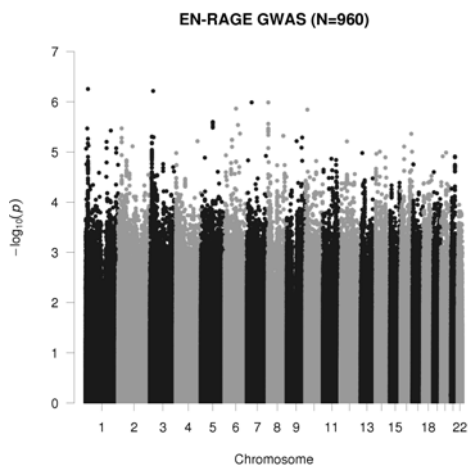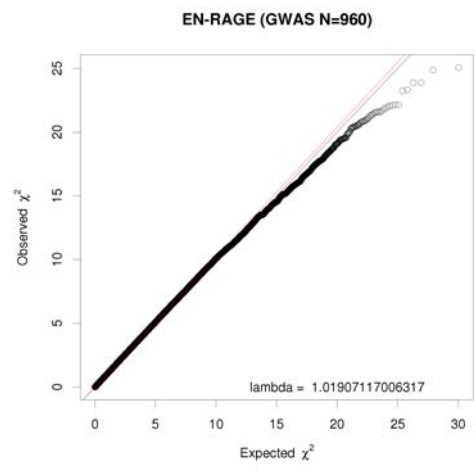

Ep-CAM GWAS (N=953)

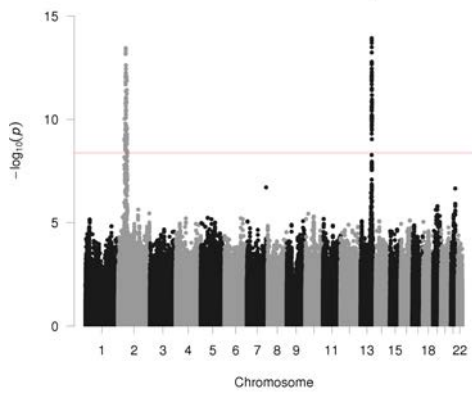

Ep-CAM (GWAS N=953)

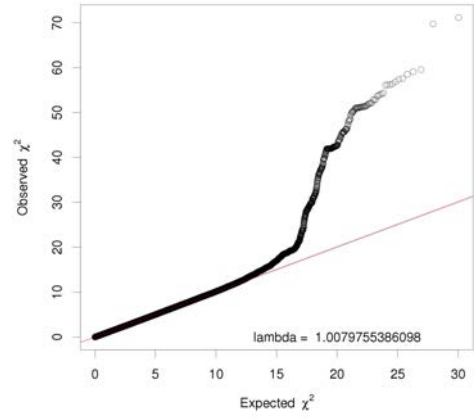

ErbB2 Her2 GWAS (N=953)

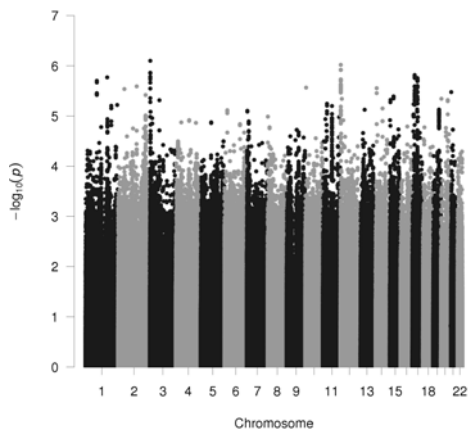

ErbB2 Her2 (GWAS N=953)

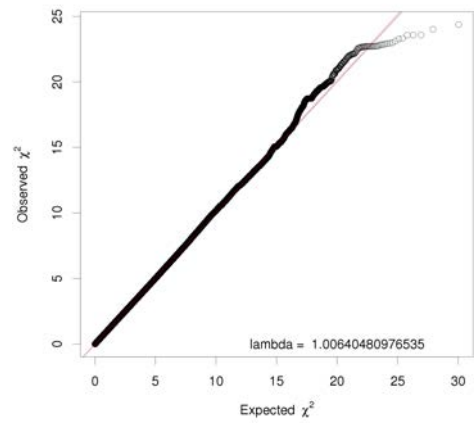

ErbB3 Her3 GWAS (N=953)

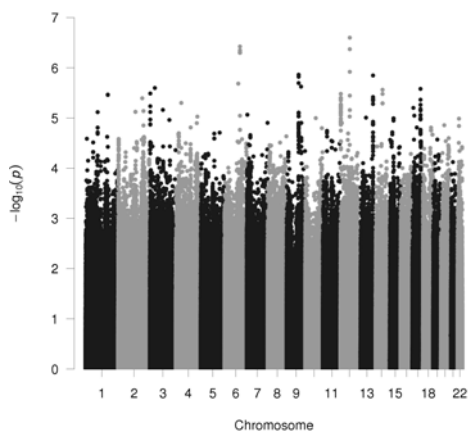

ErbB3 Her3 (GWAS N=953)

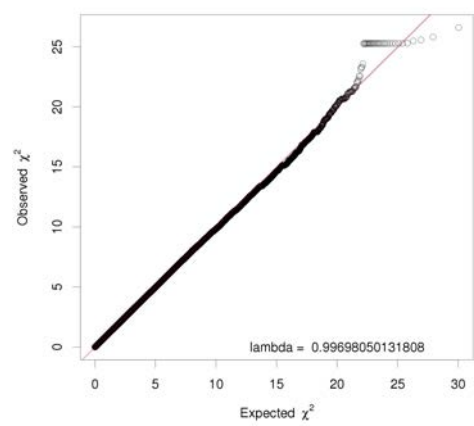

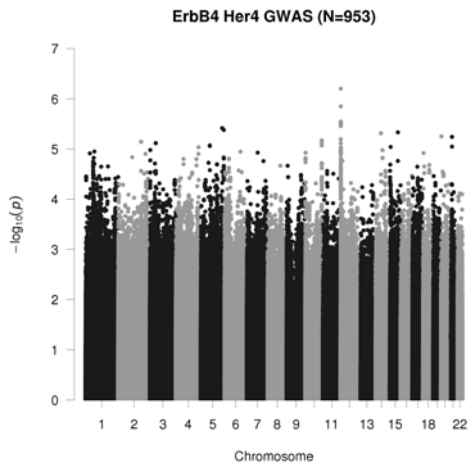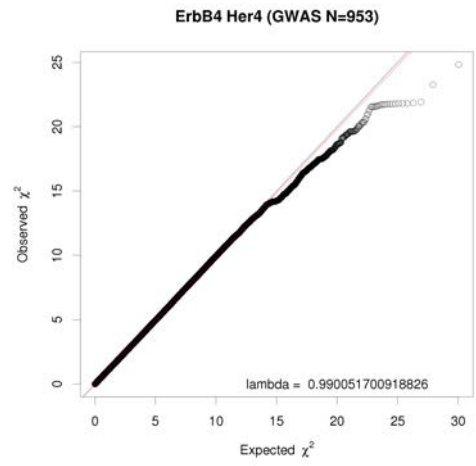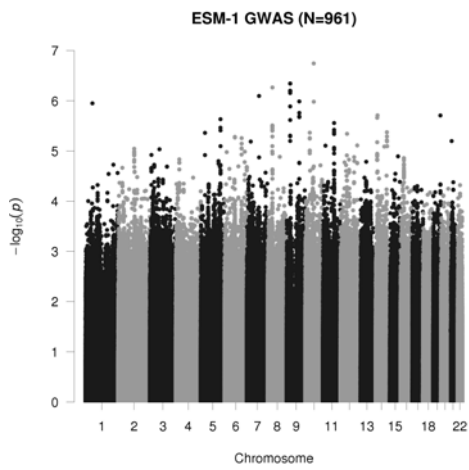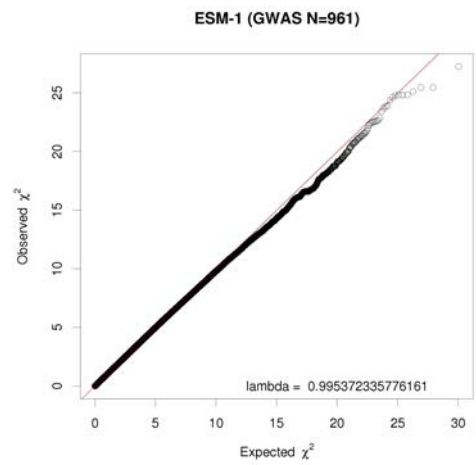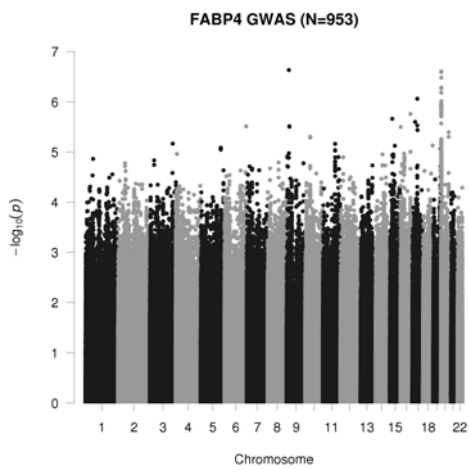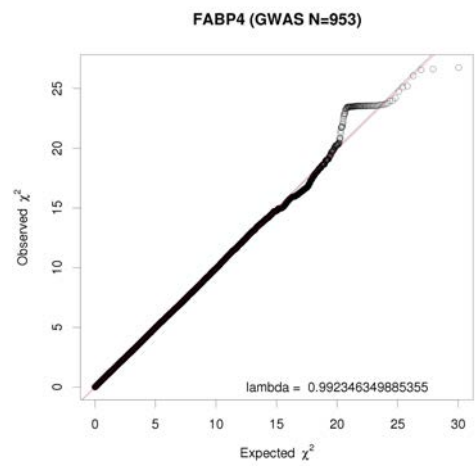

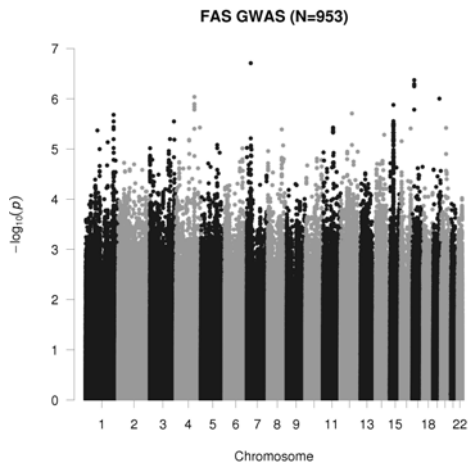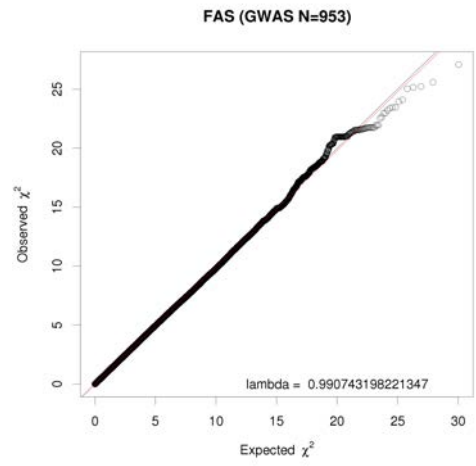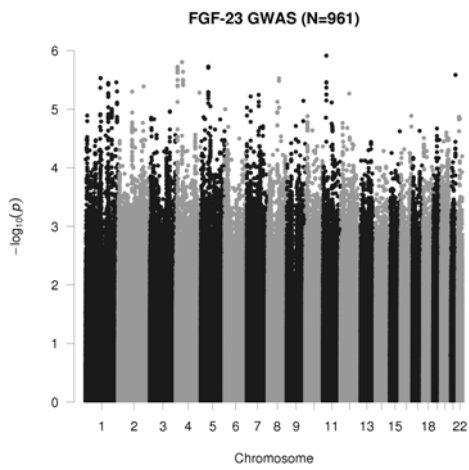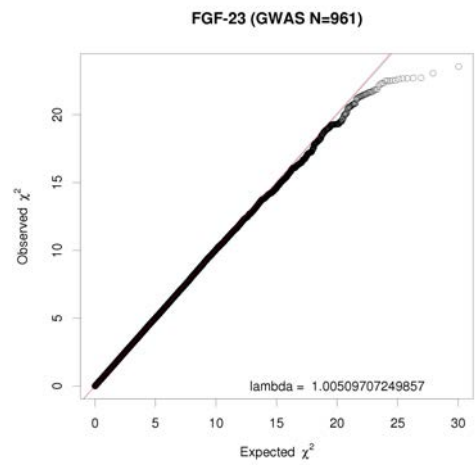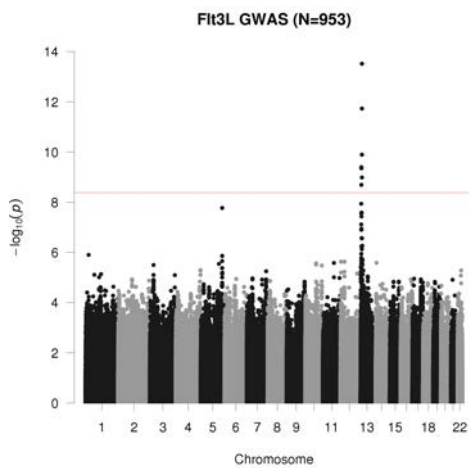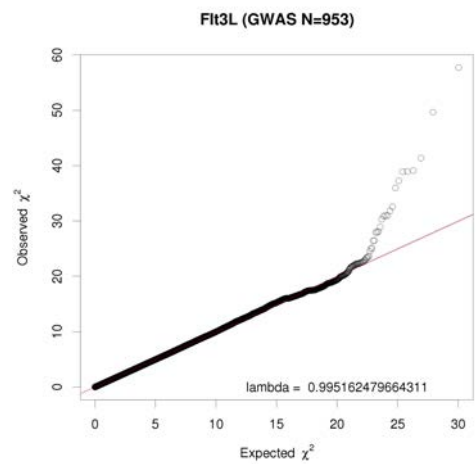



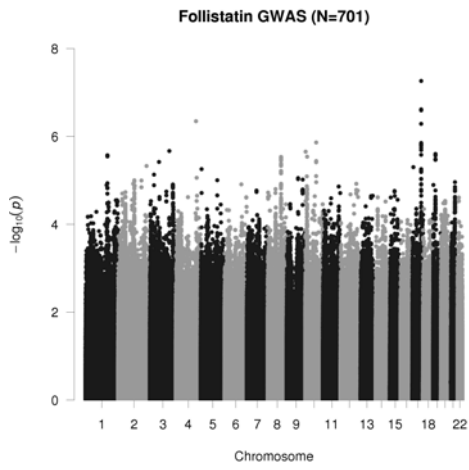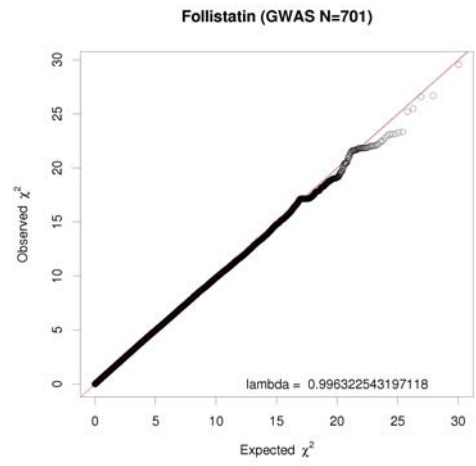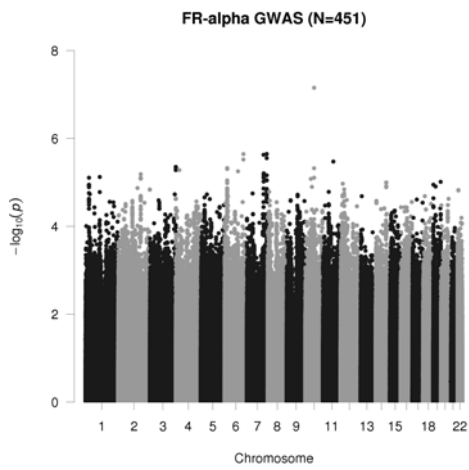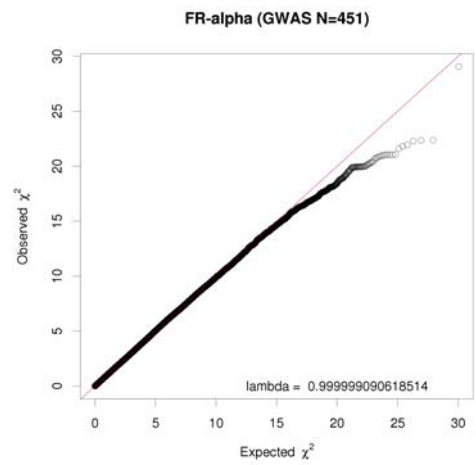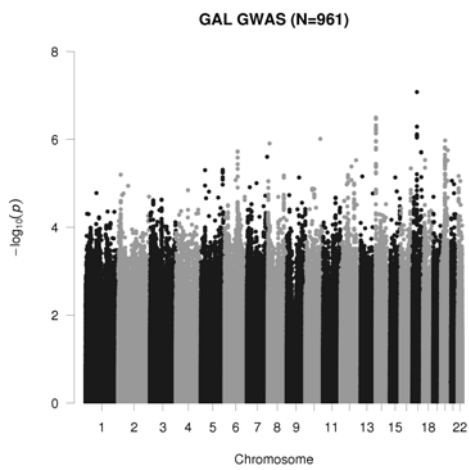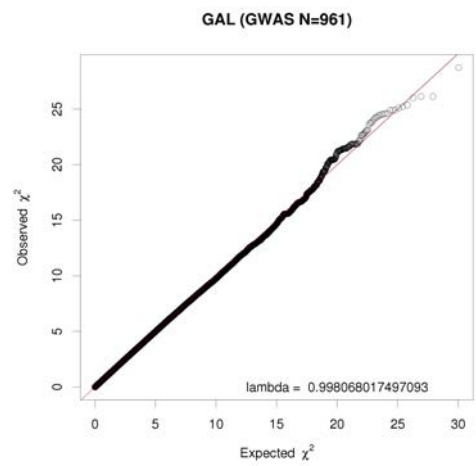

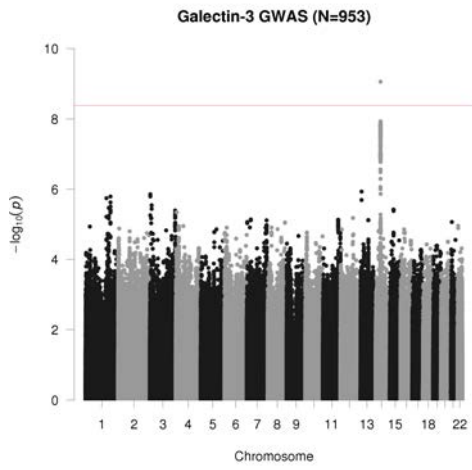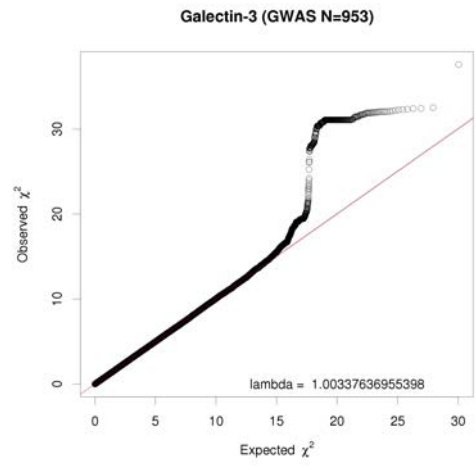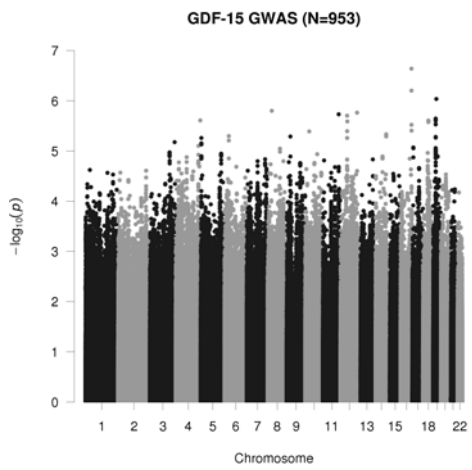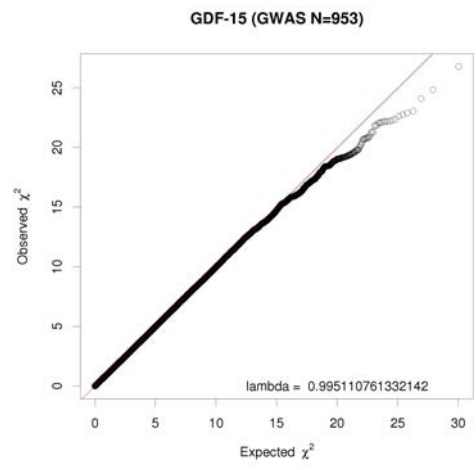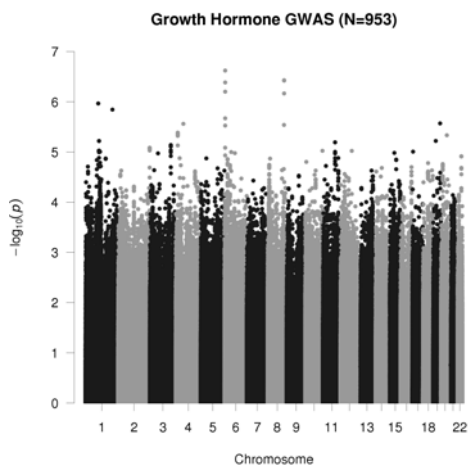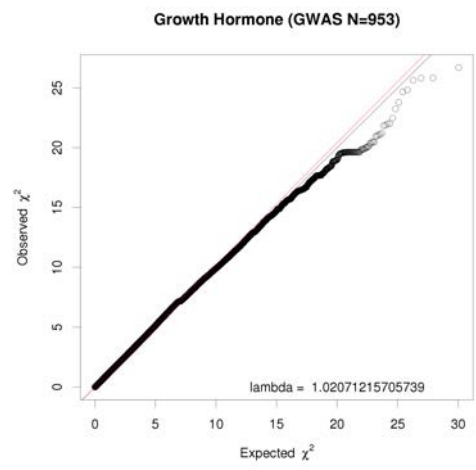

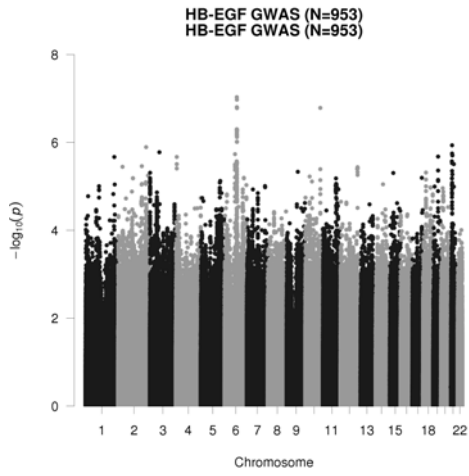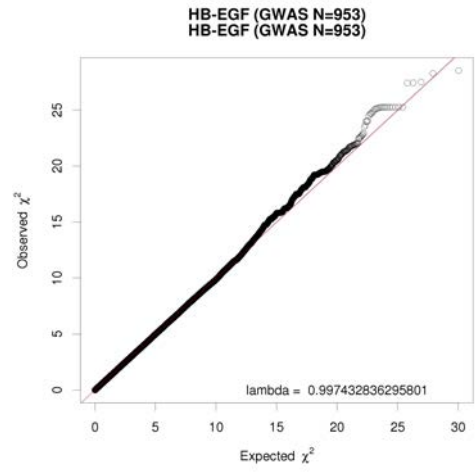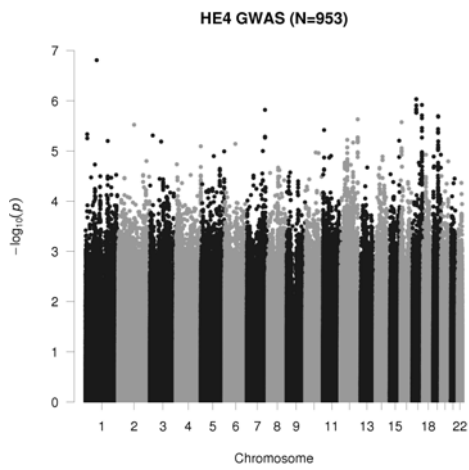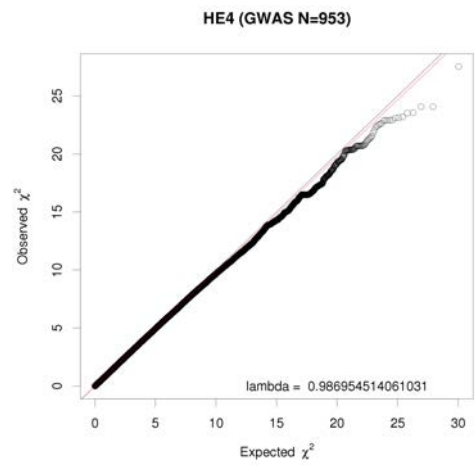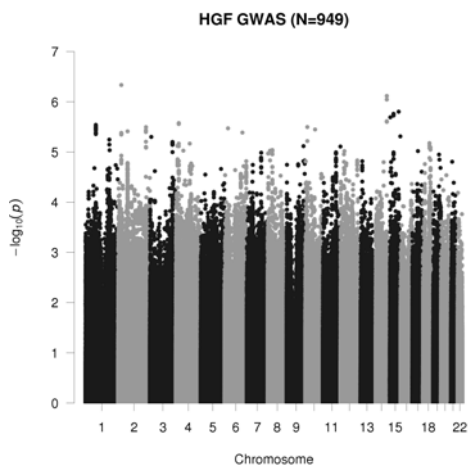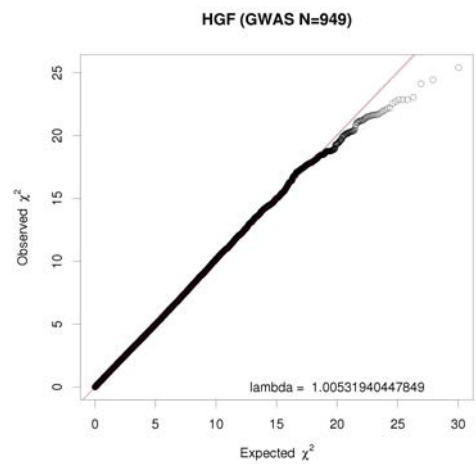

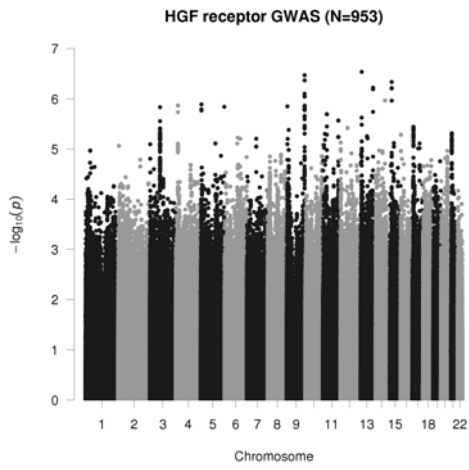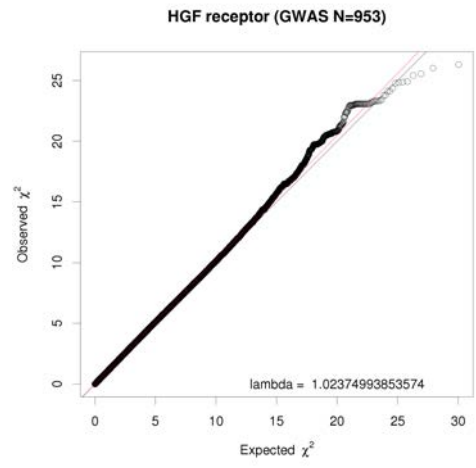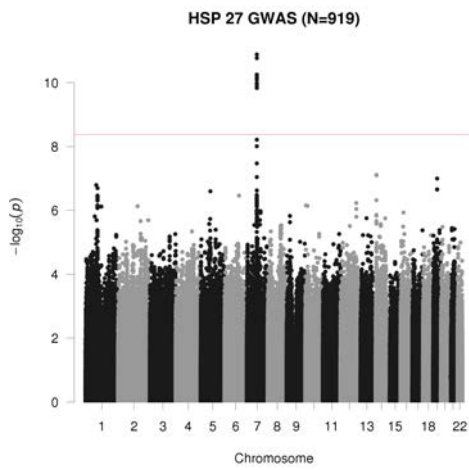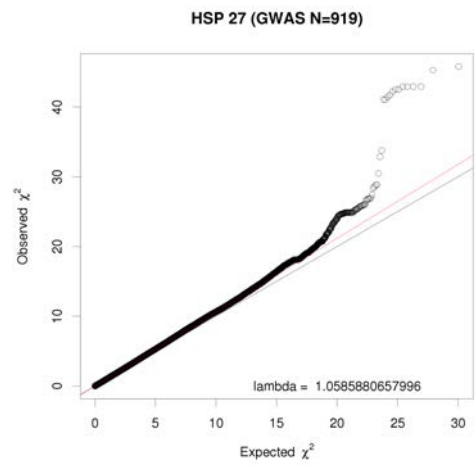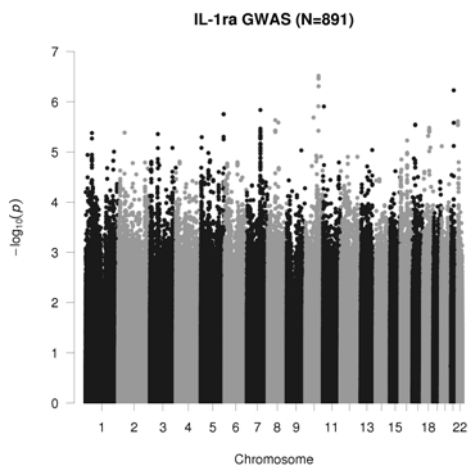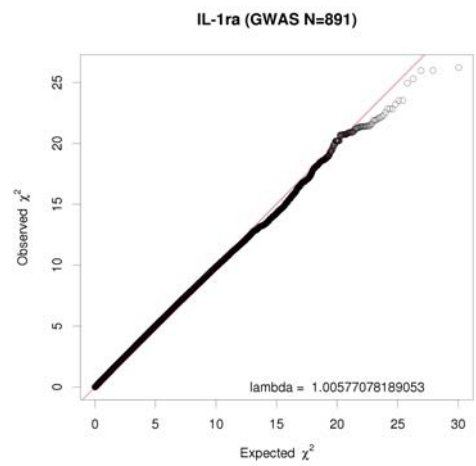

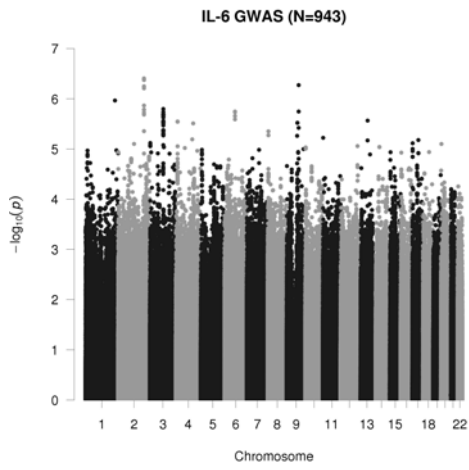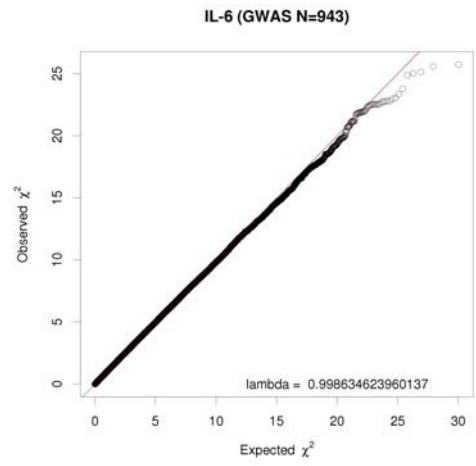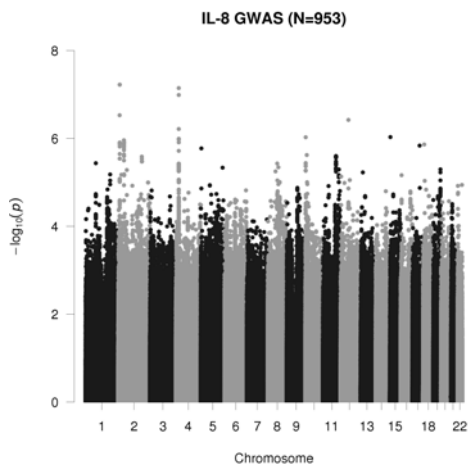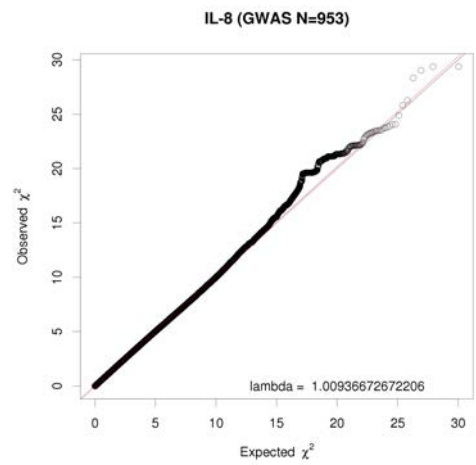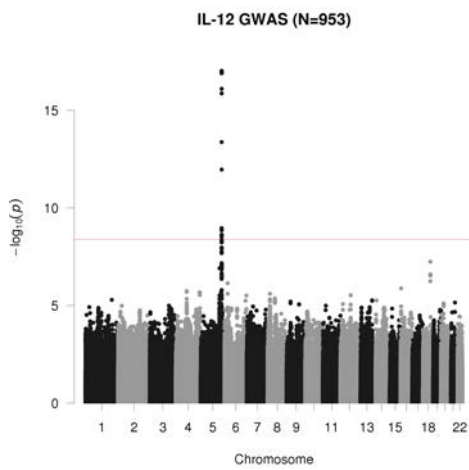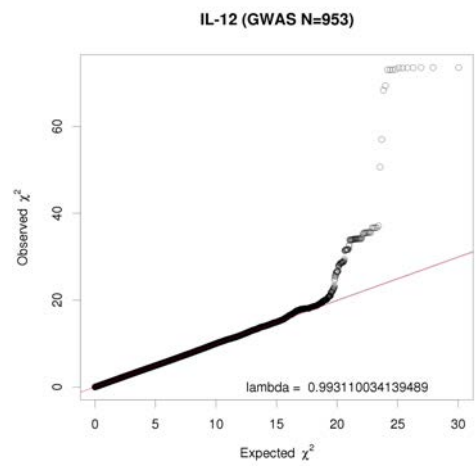

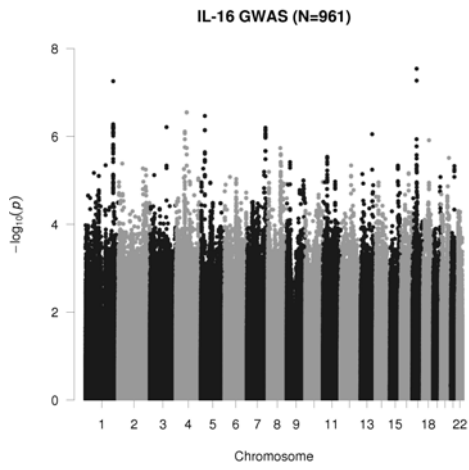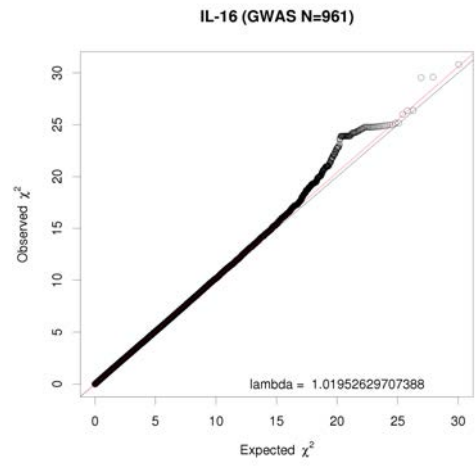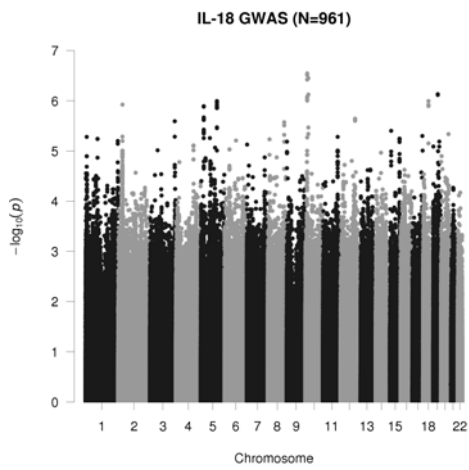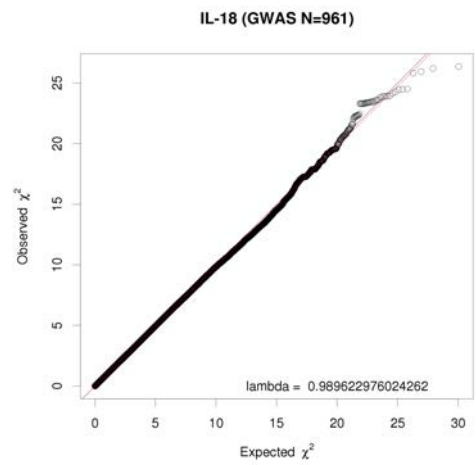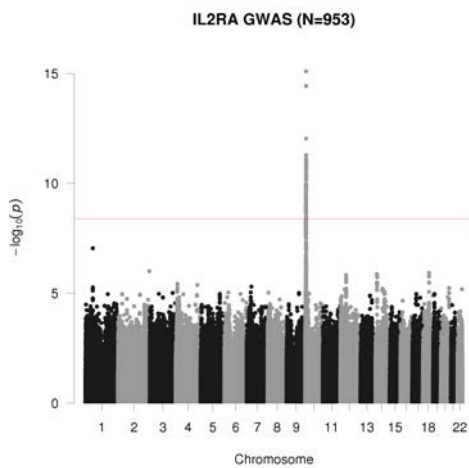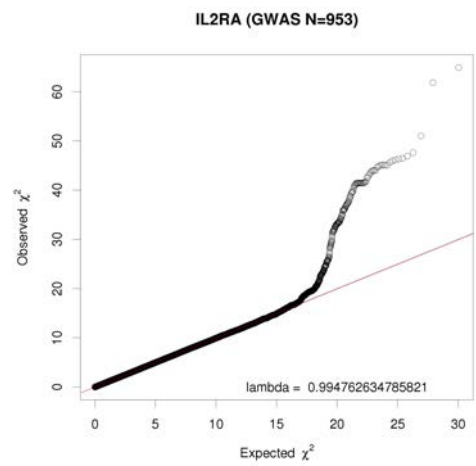

IL6RA GWAS (N=953)

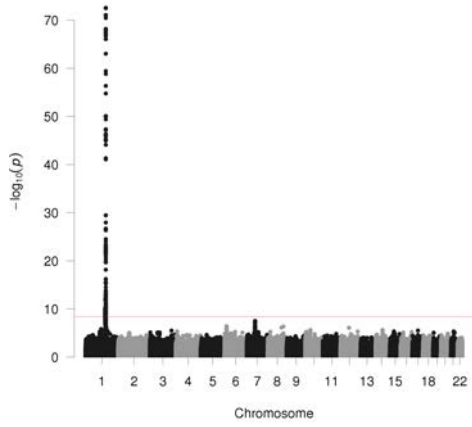

IL6RA (GWAS N=953)

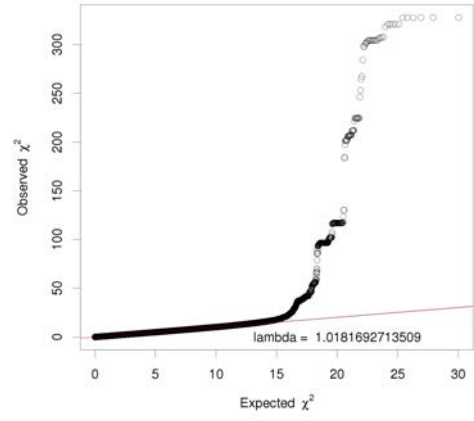

IL17RB GWAS (N=609)

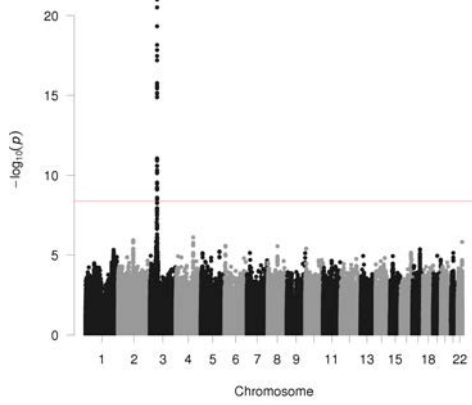

IL17RB (GWAS N=609)

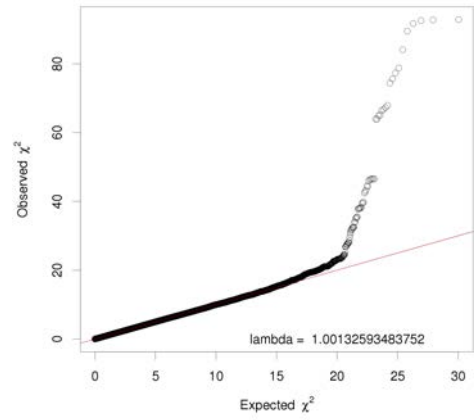

IL27-A GWAS (N=961)

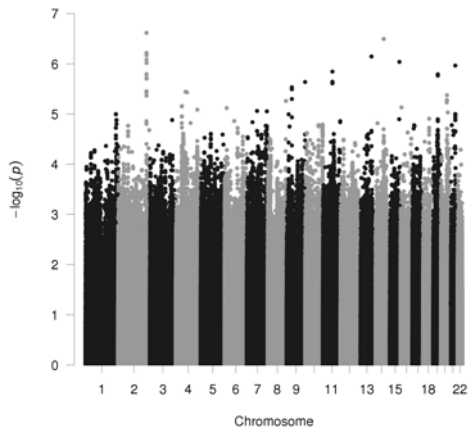

IL27-A (GWAS N=961)

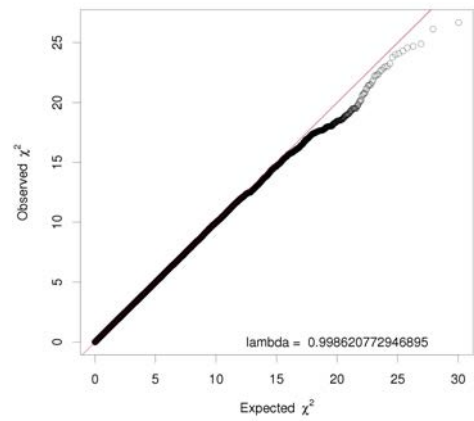

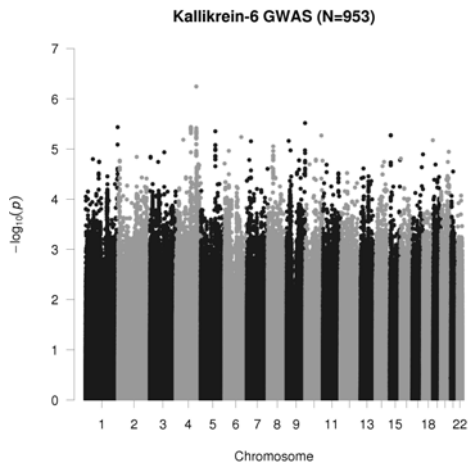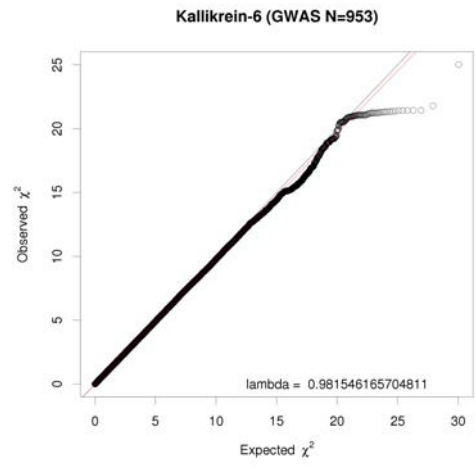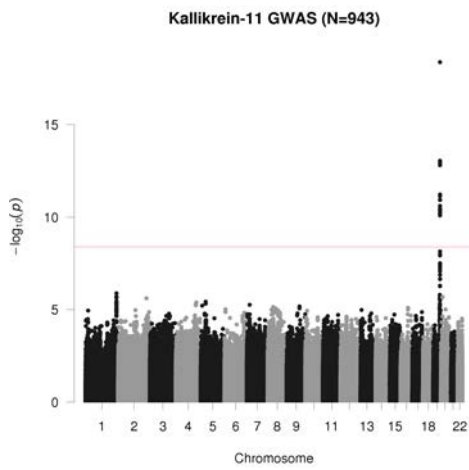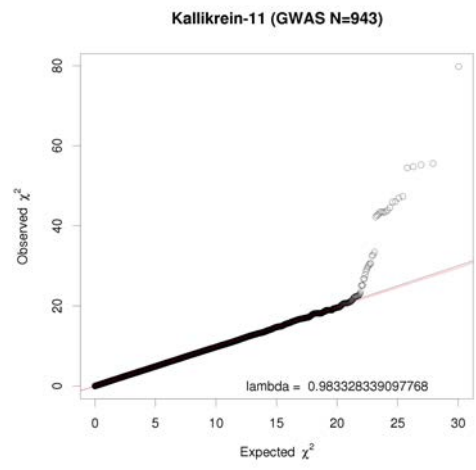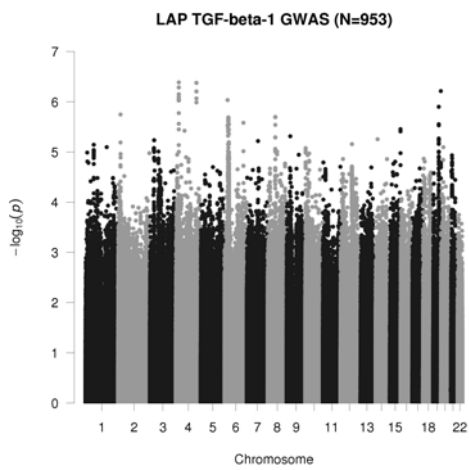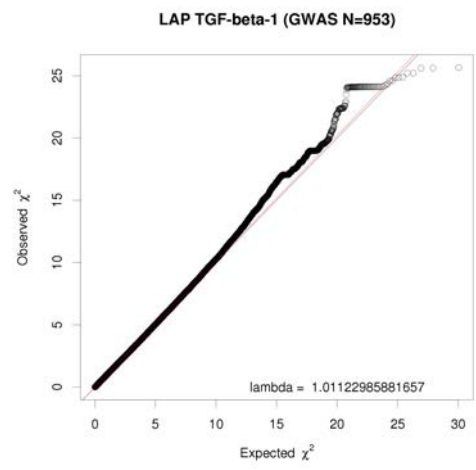



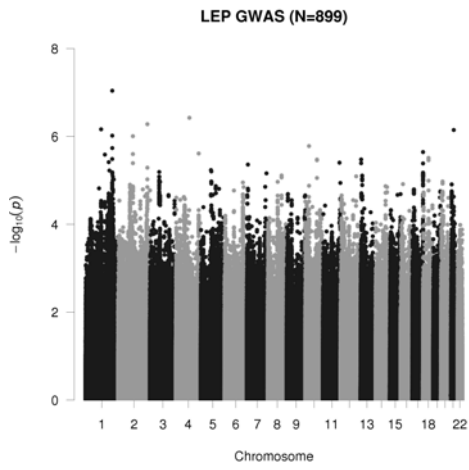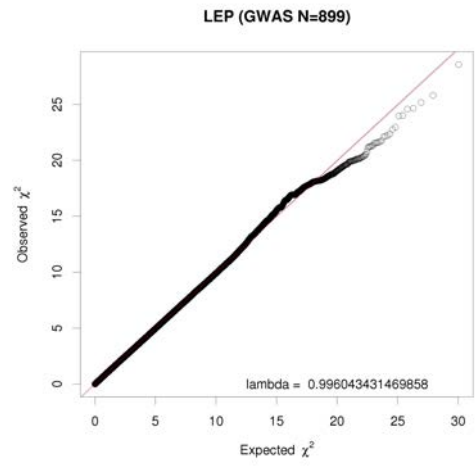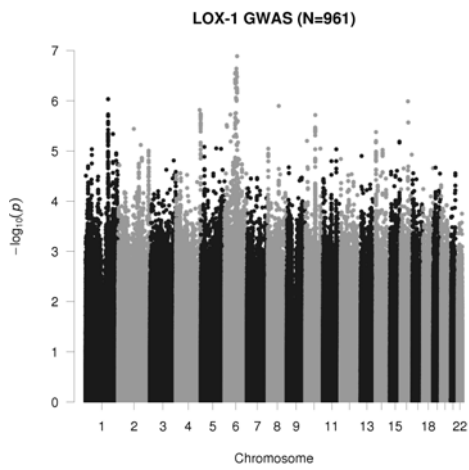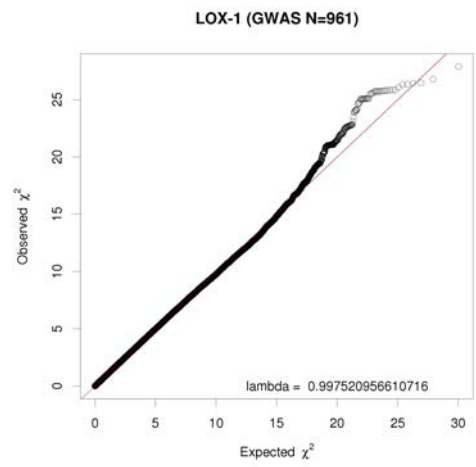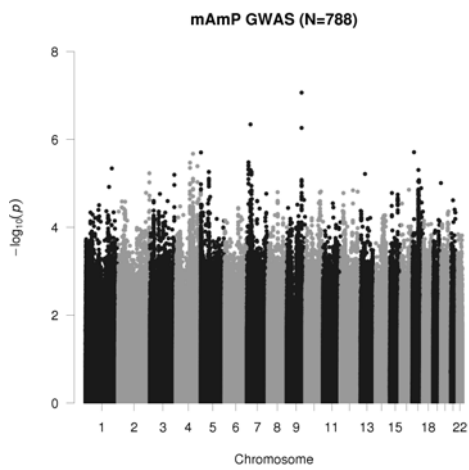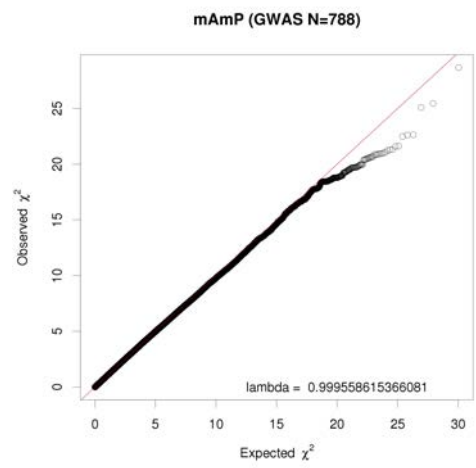

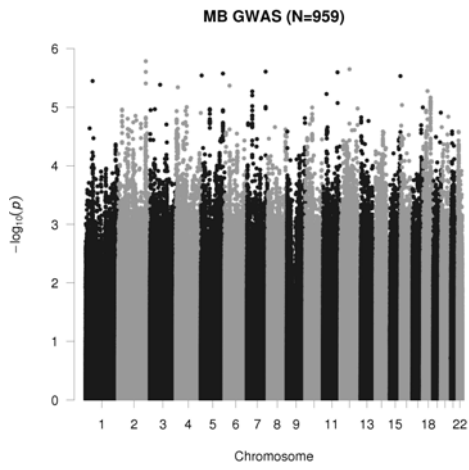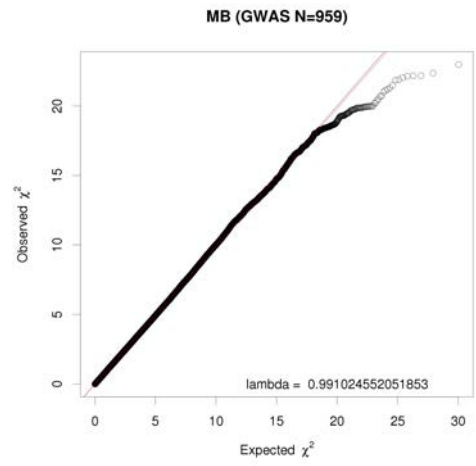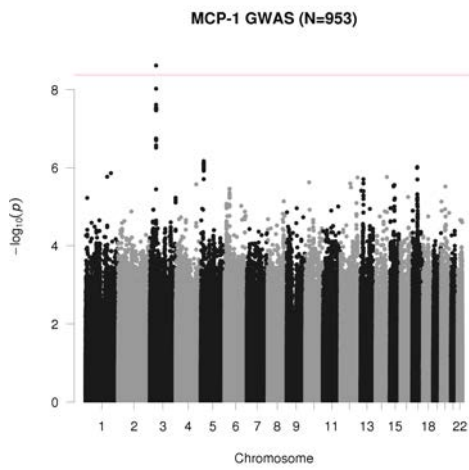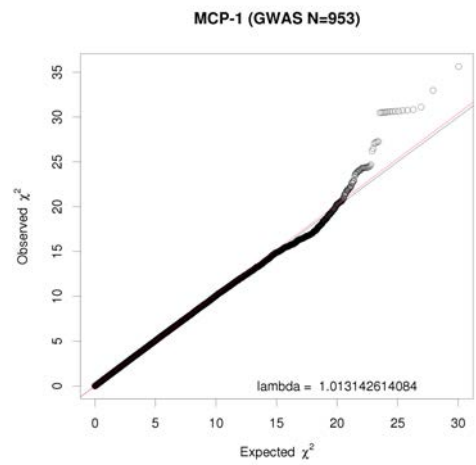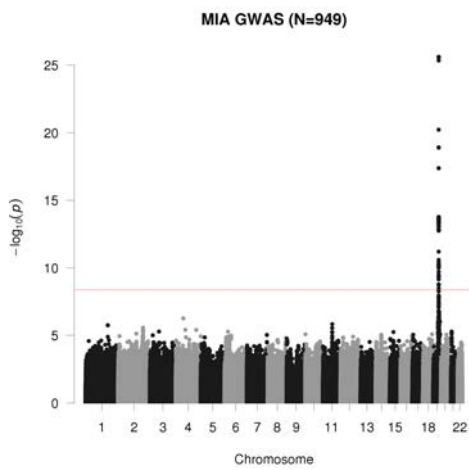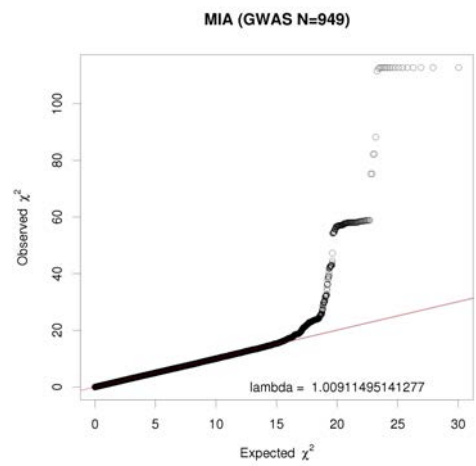

MIC-A GWAS (N=530)

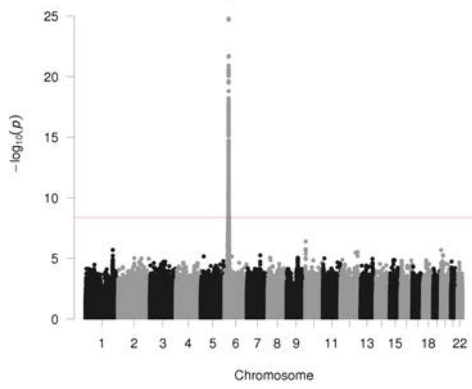

MIC-A (GWAS N=530)

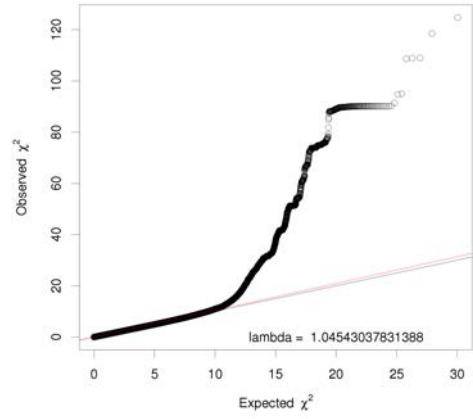

Midkine GWAS (N=953)

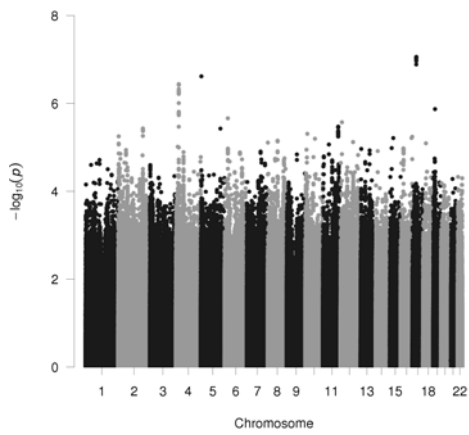

Midkine (GWAS N=953)

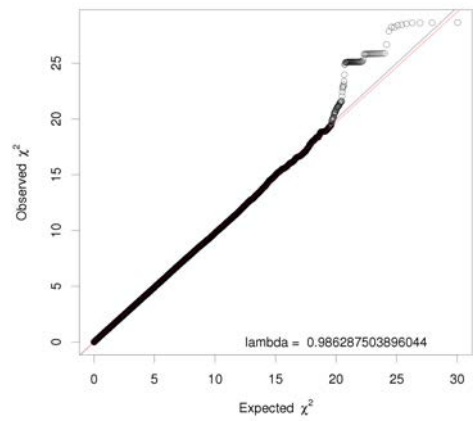

MMP-1 GWAS (N=931)

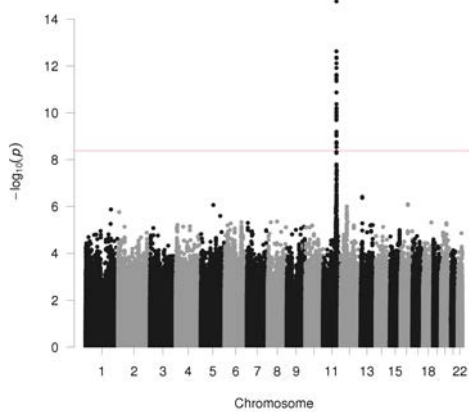

MMP-1 (GWAS N=931)

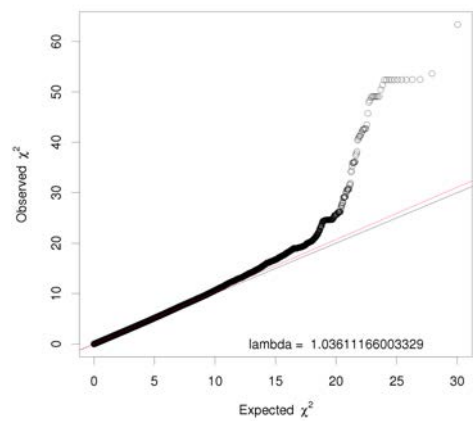

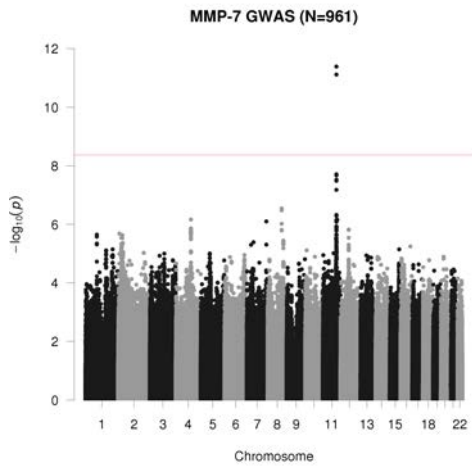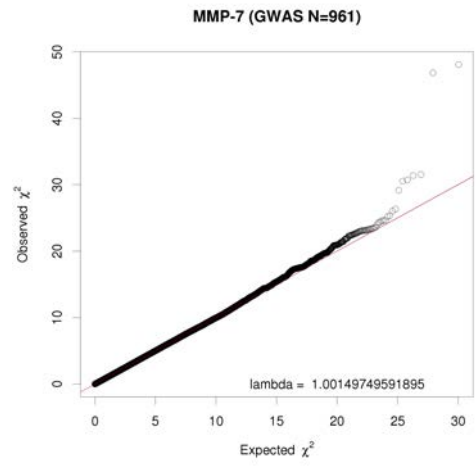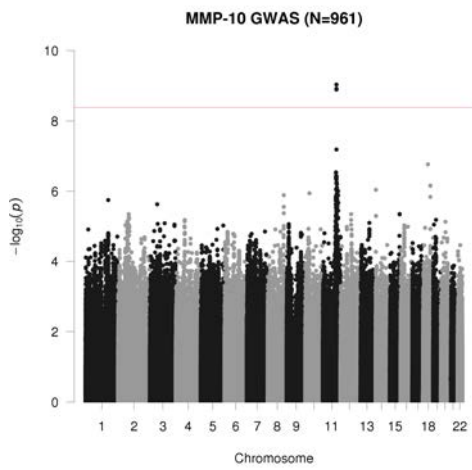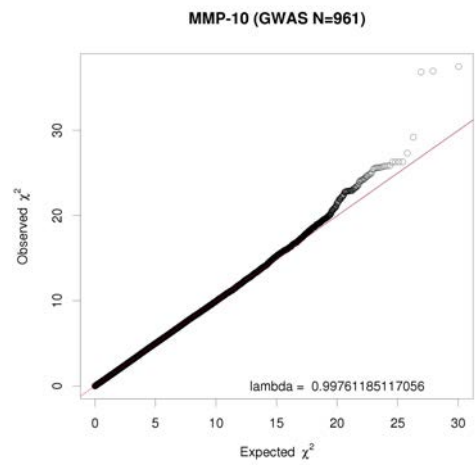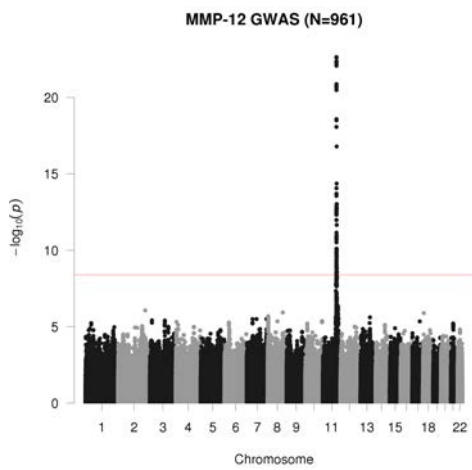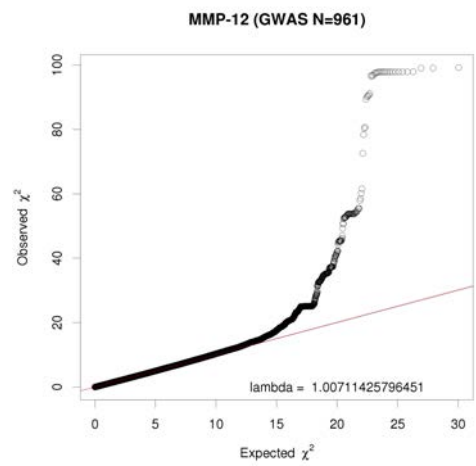

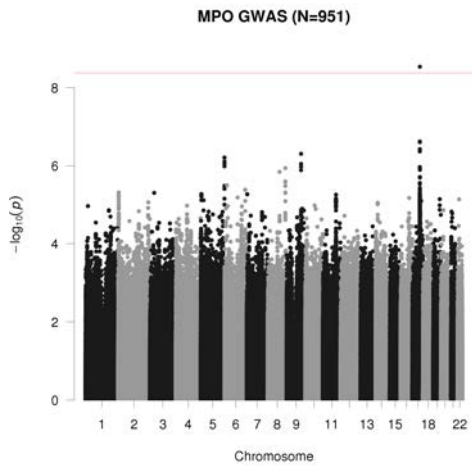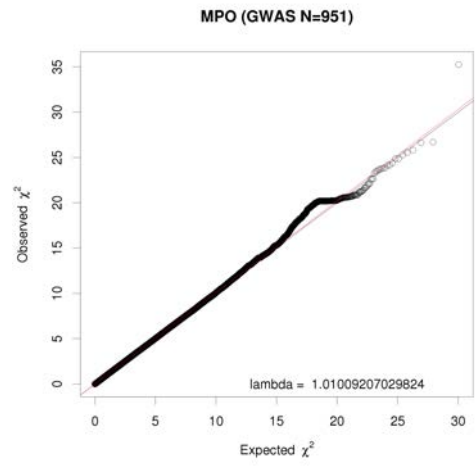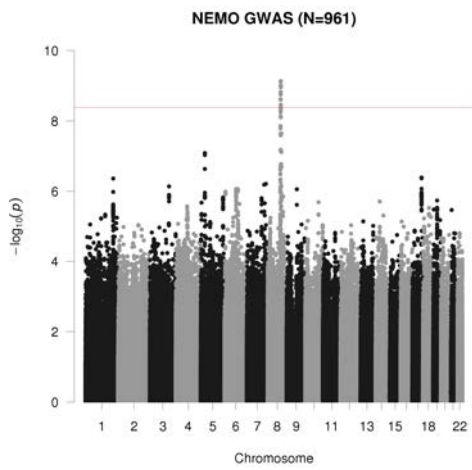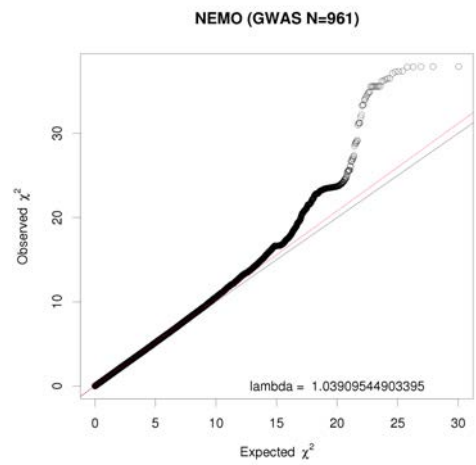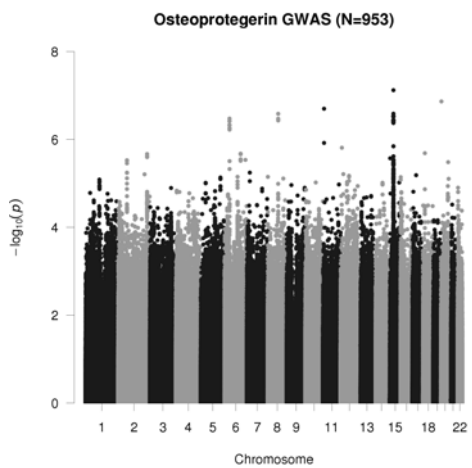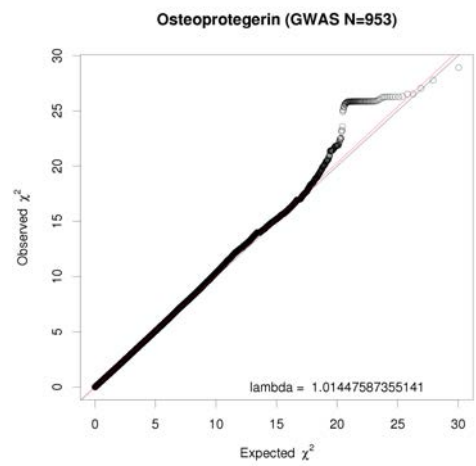

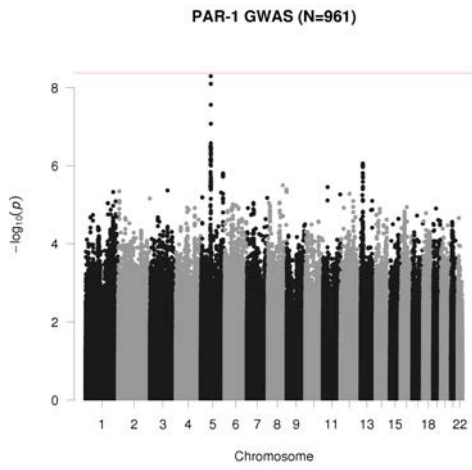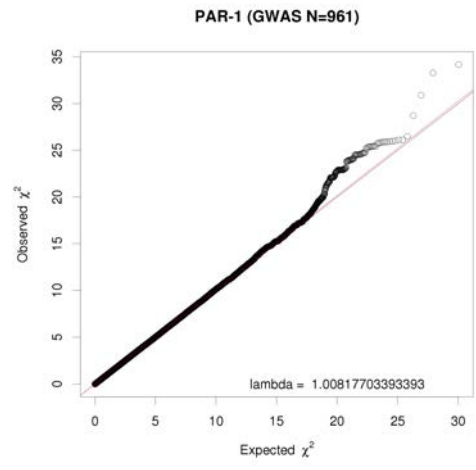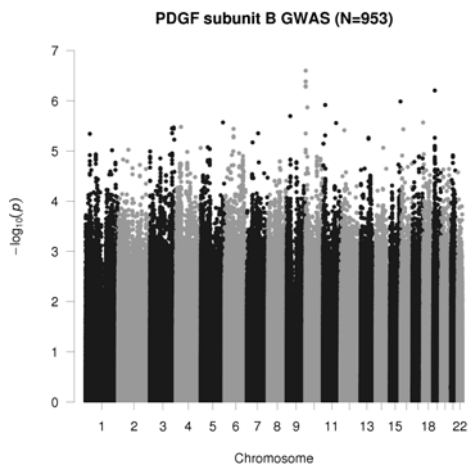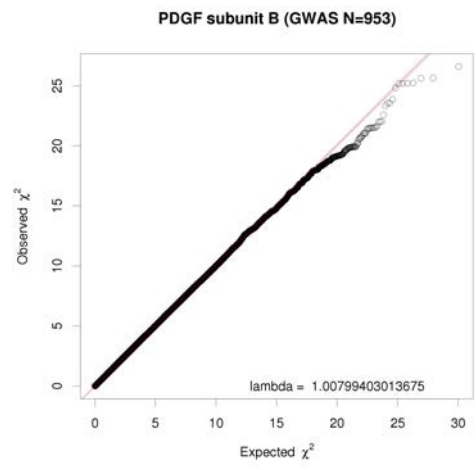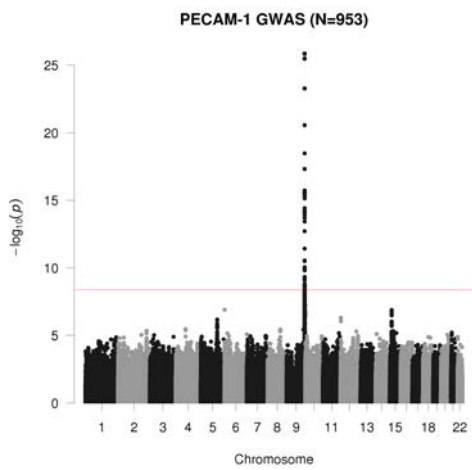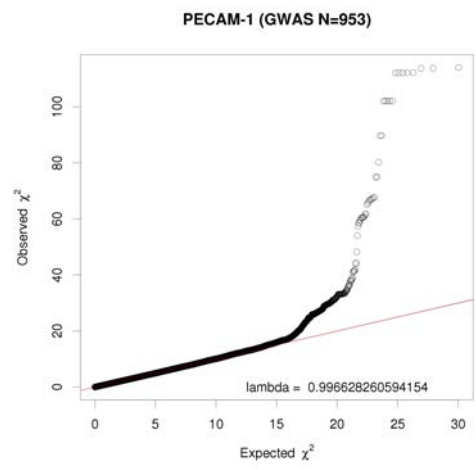

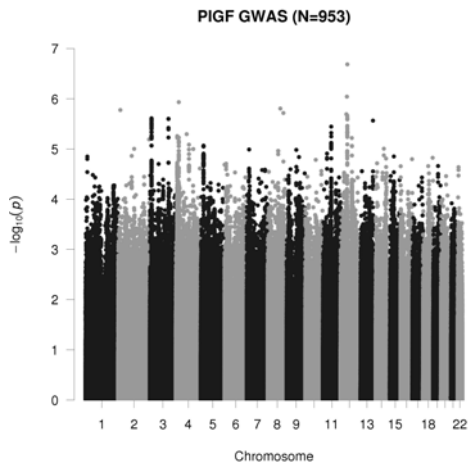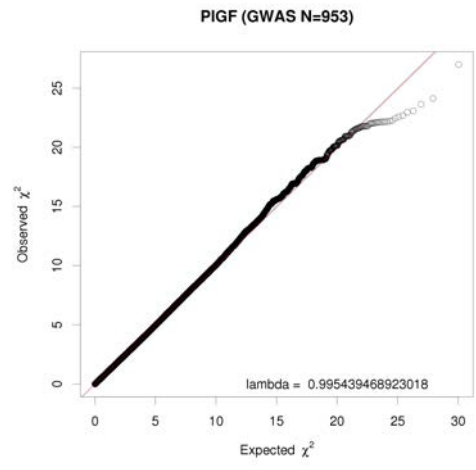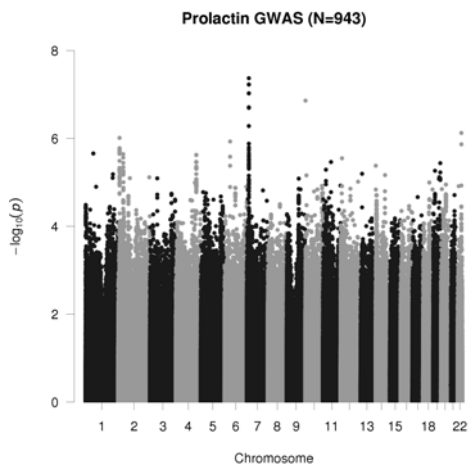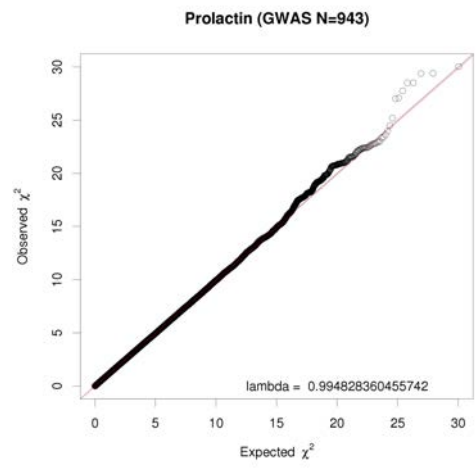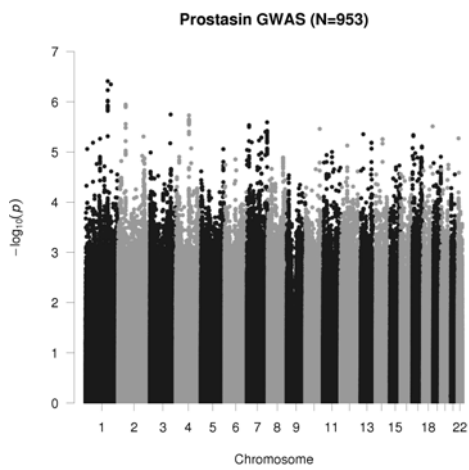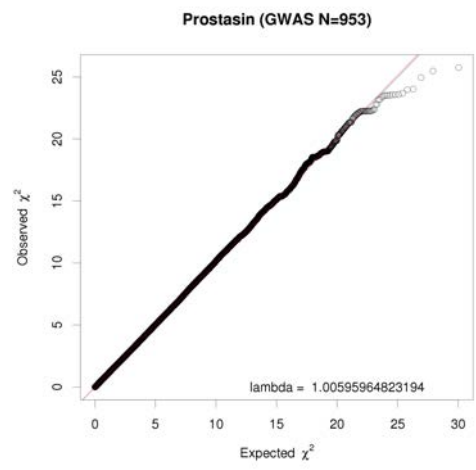

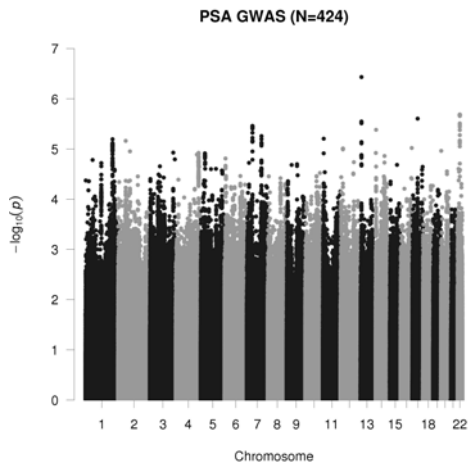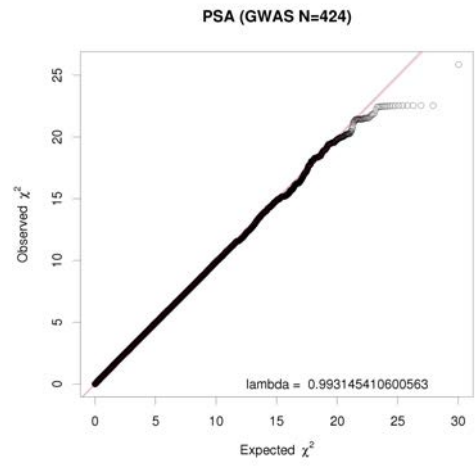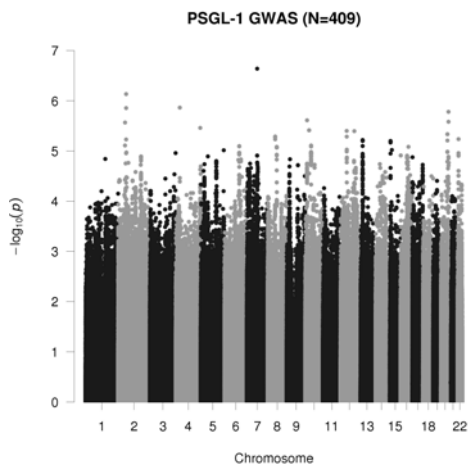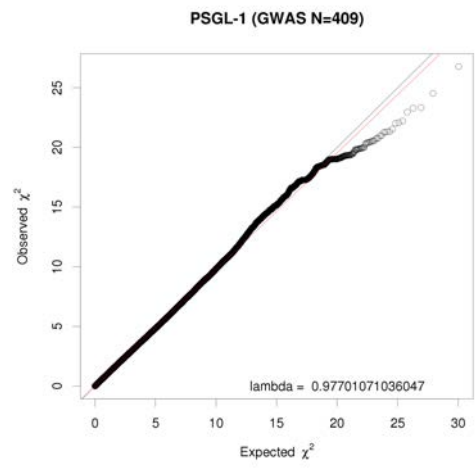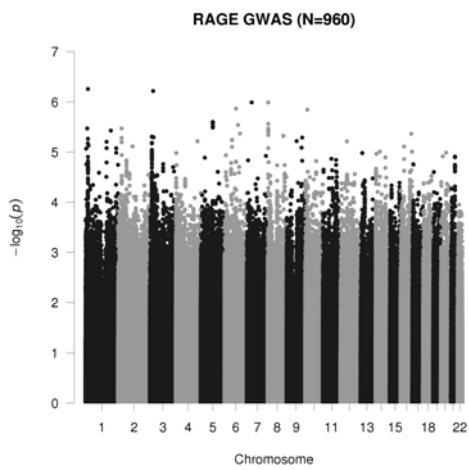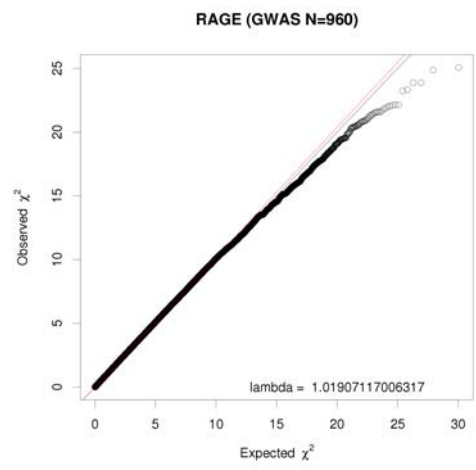



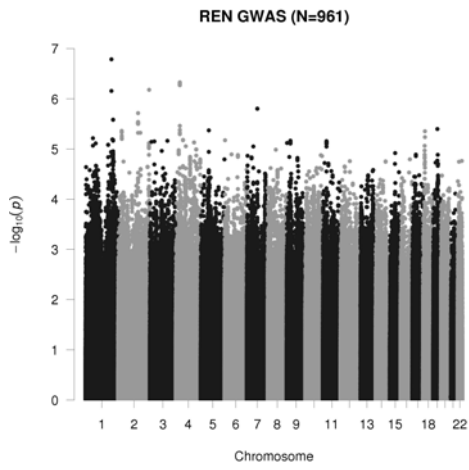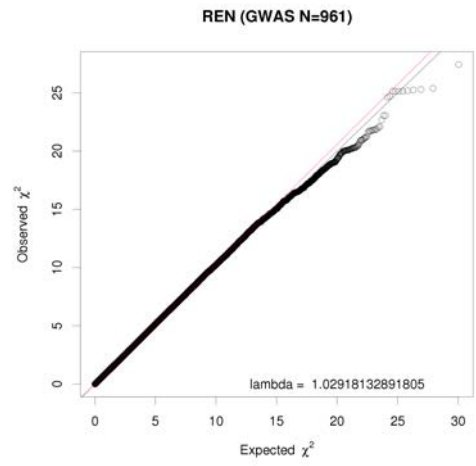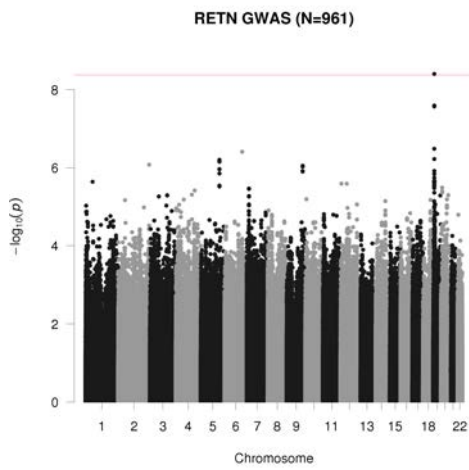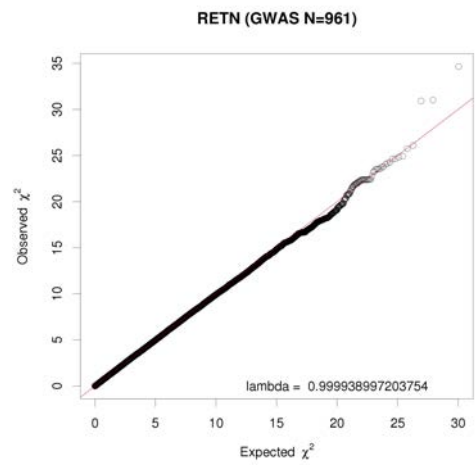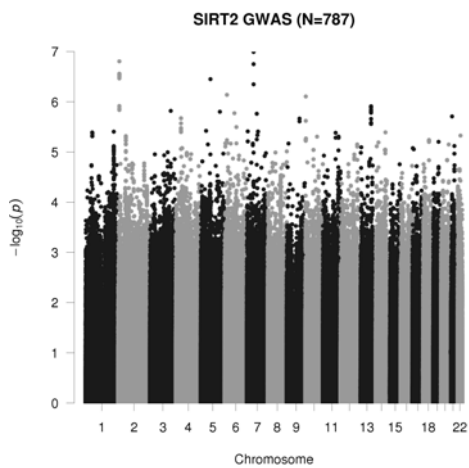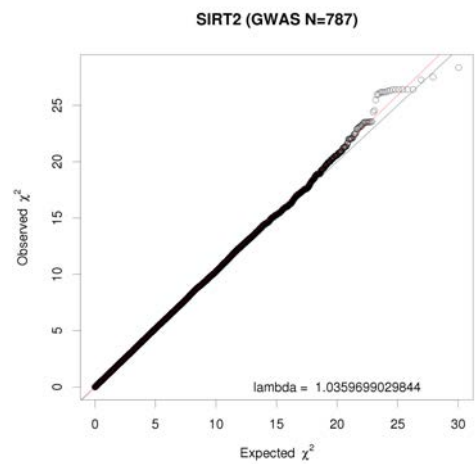

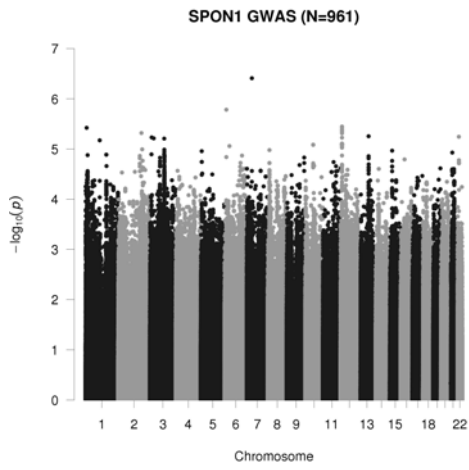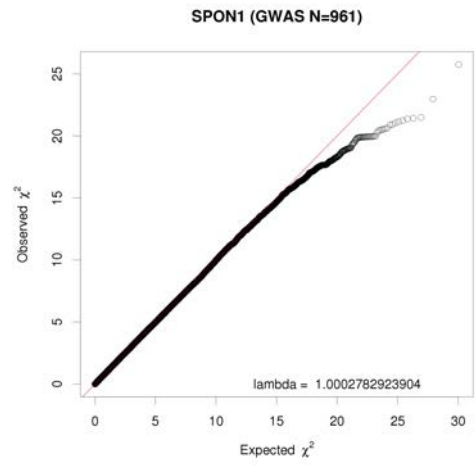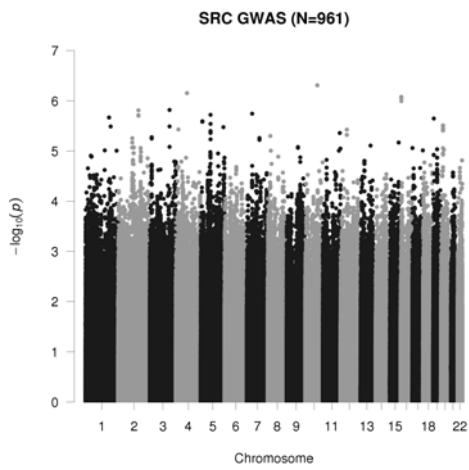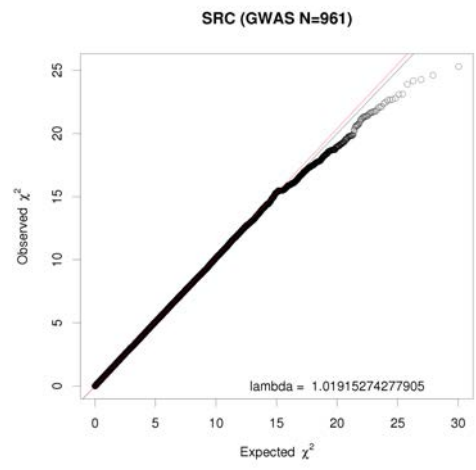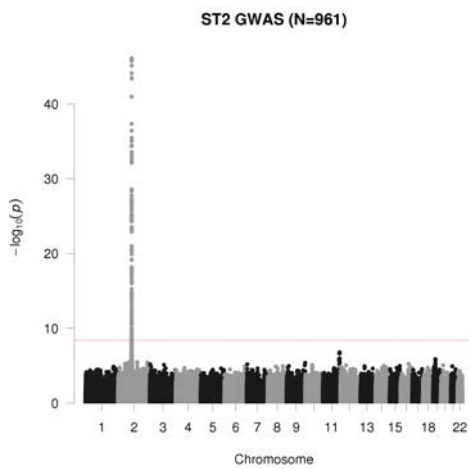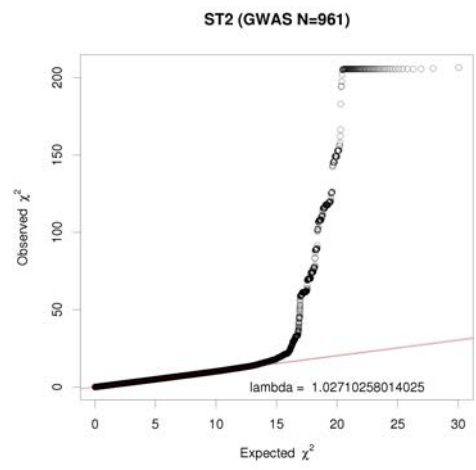

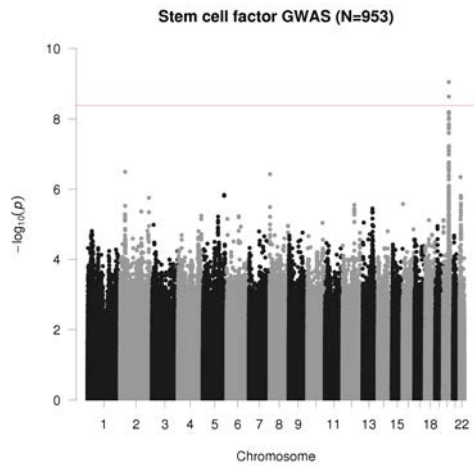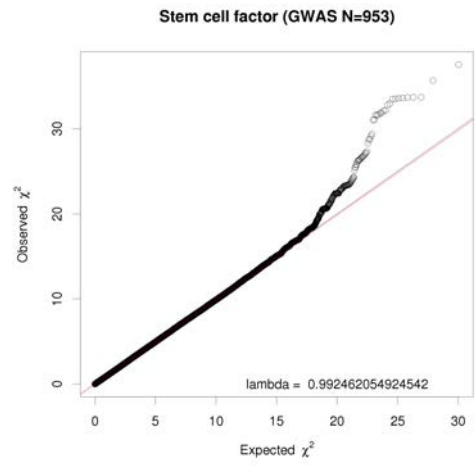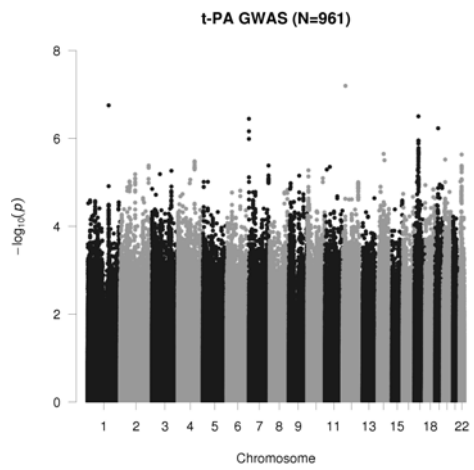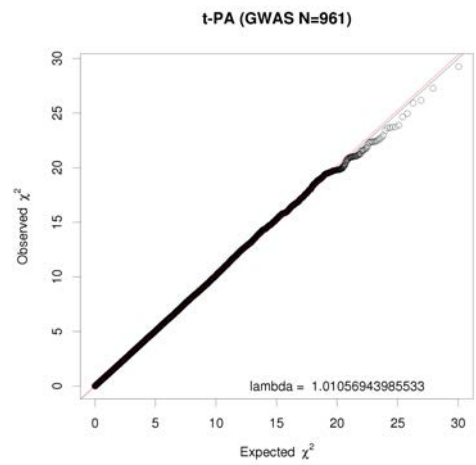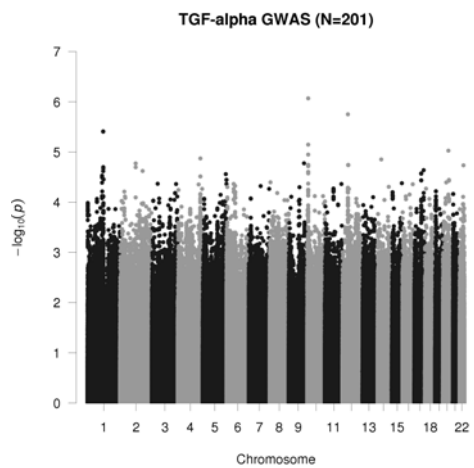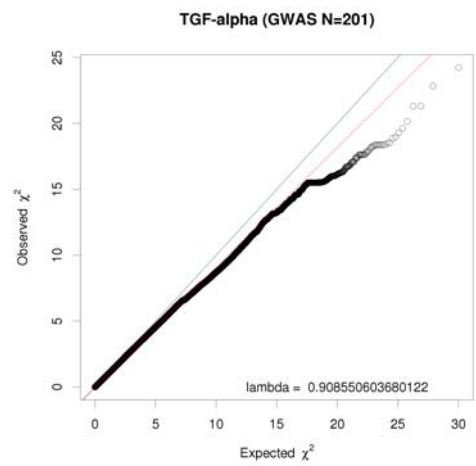

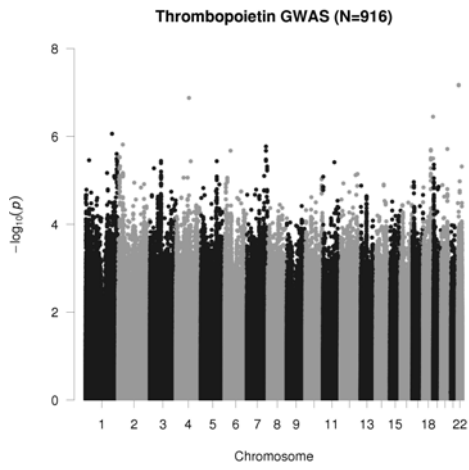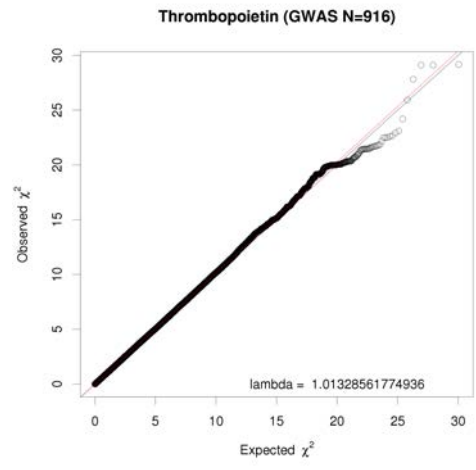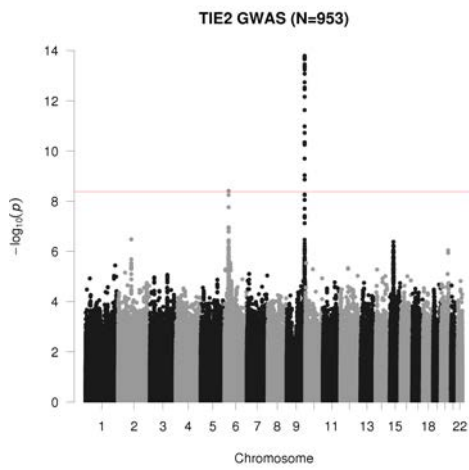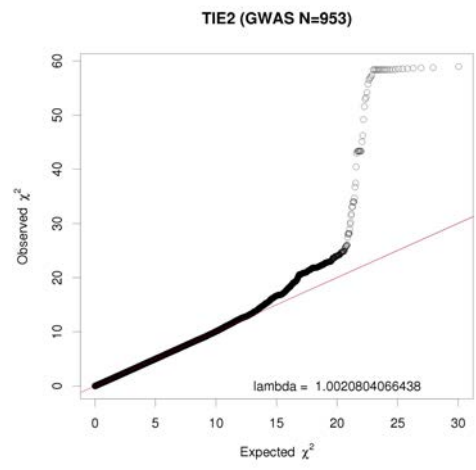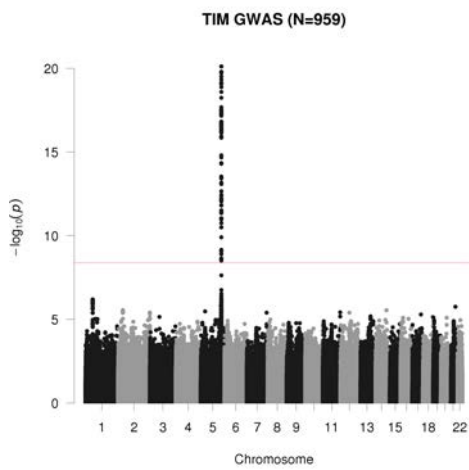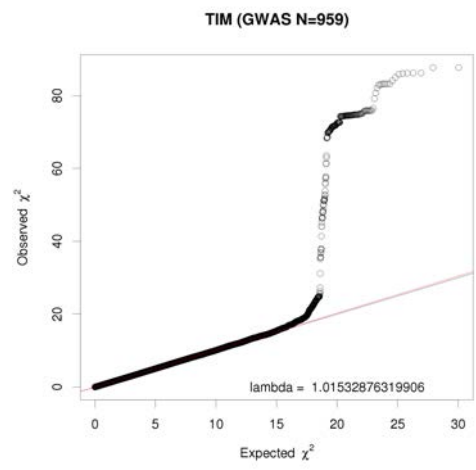

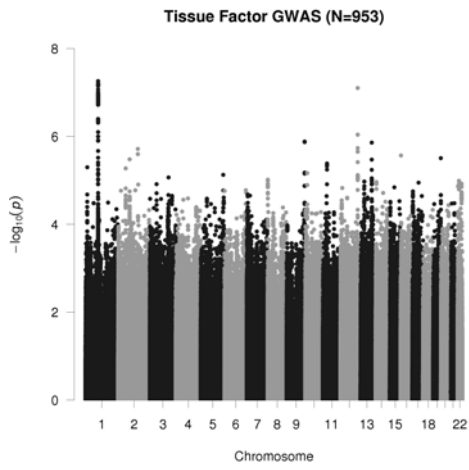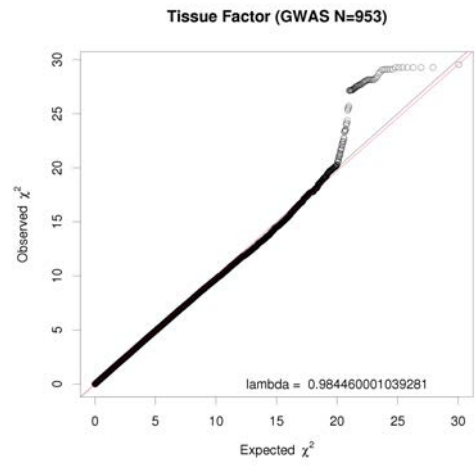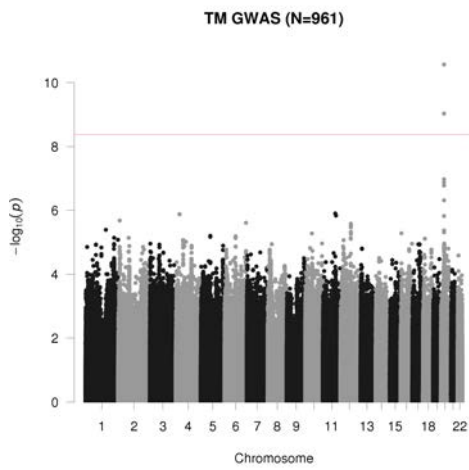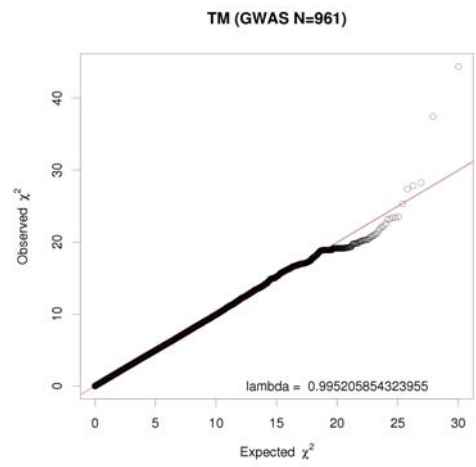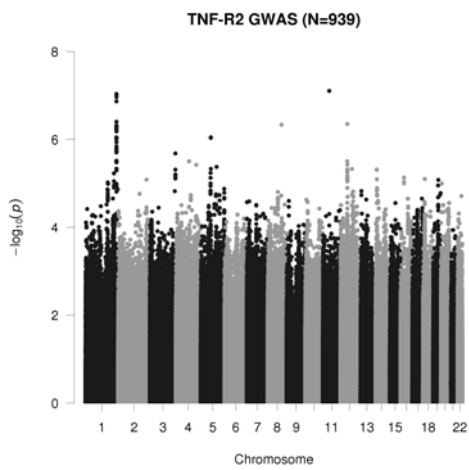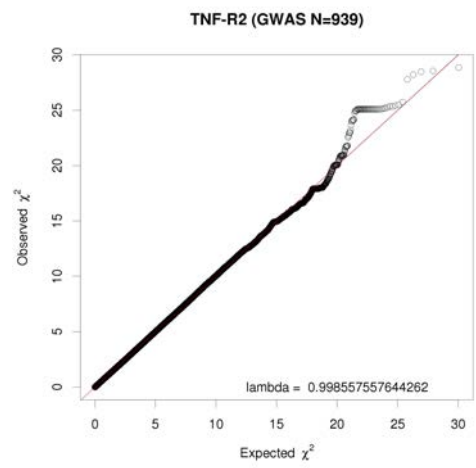

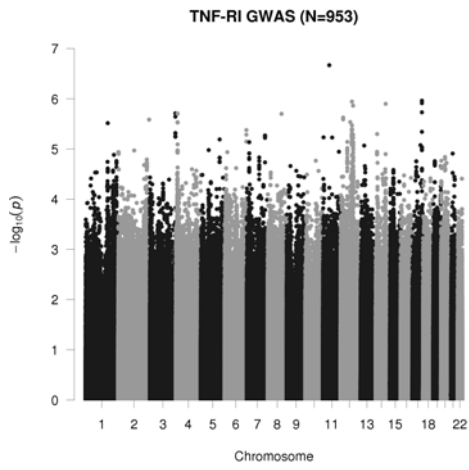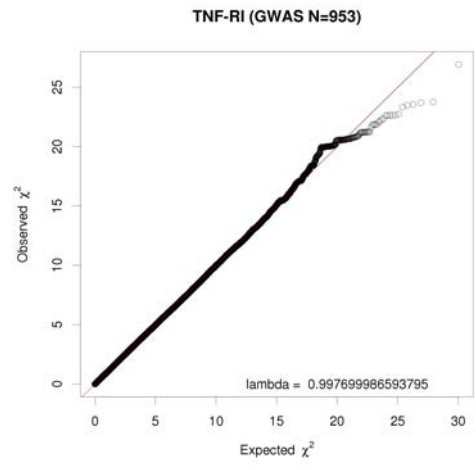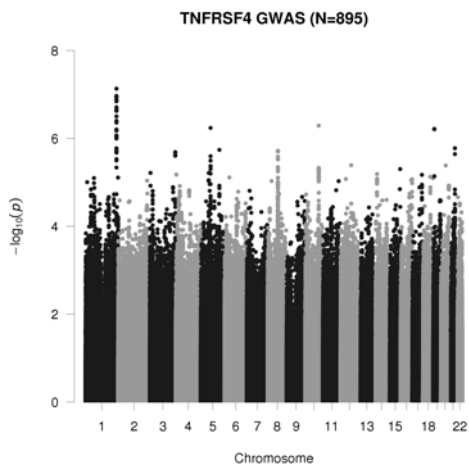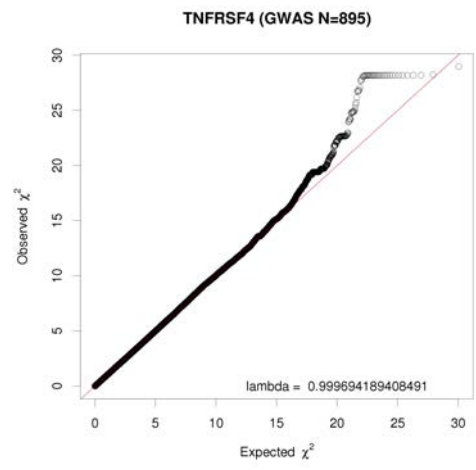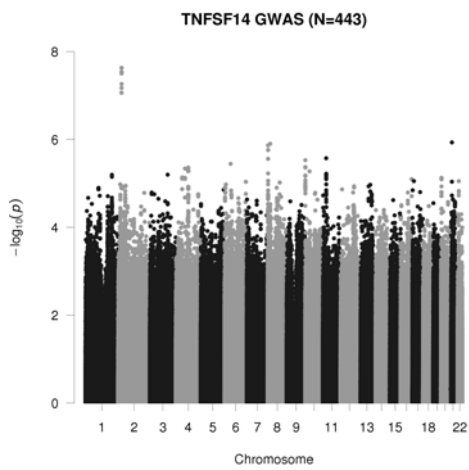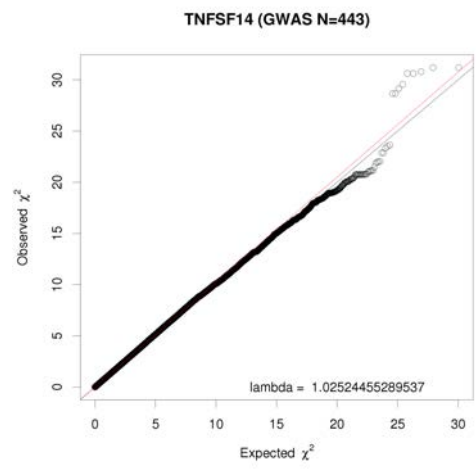

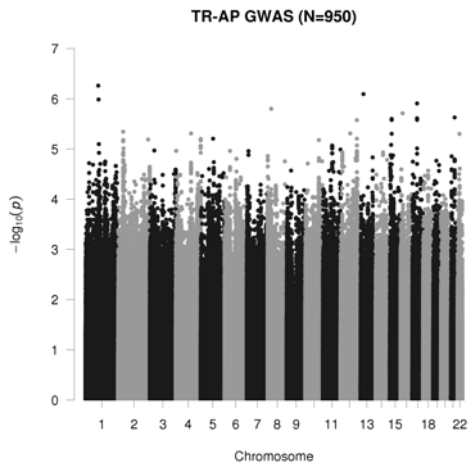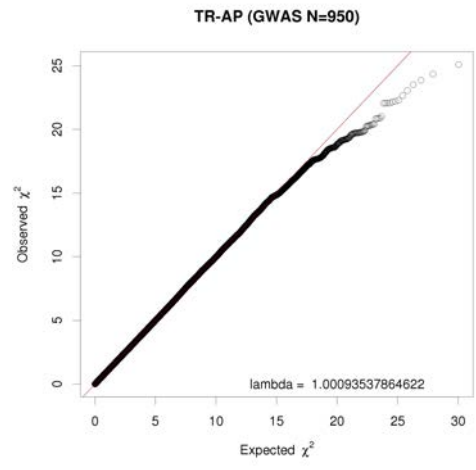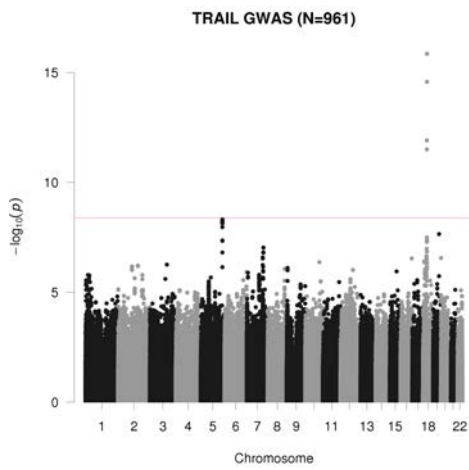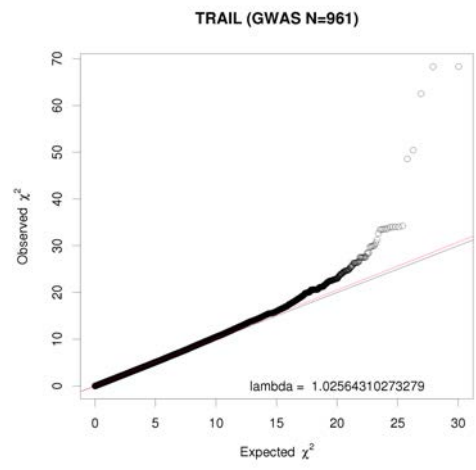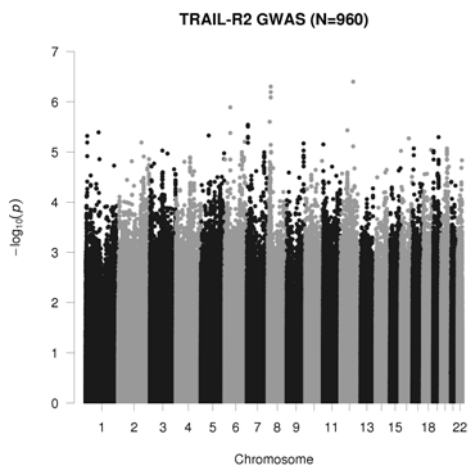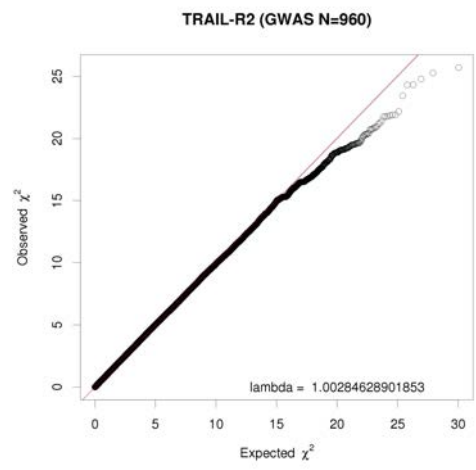

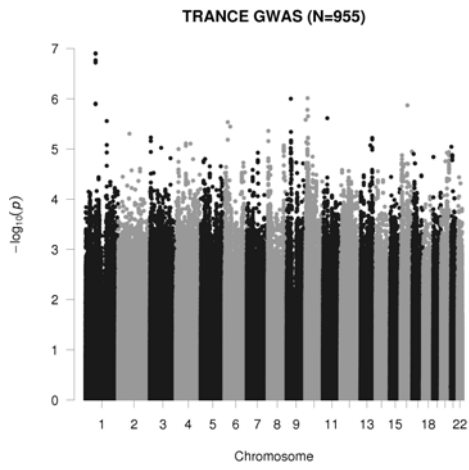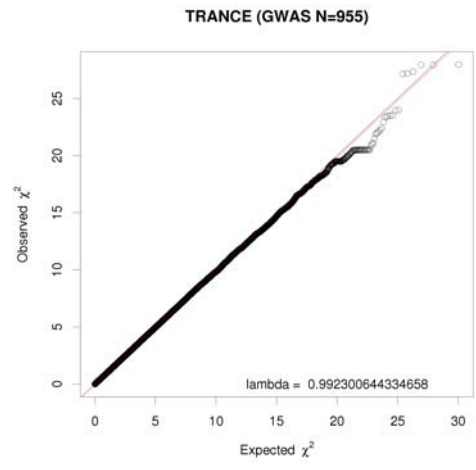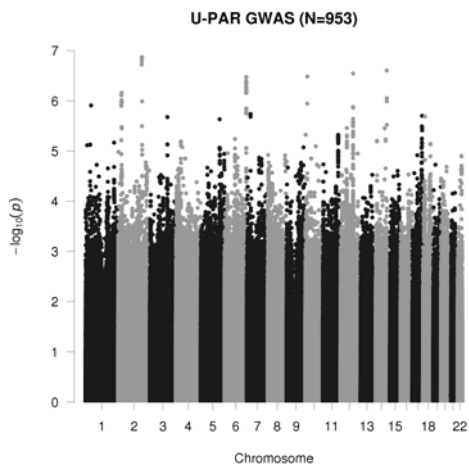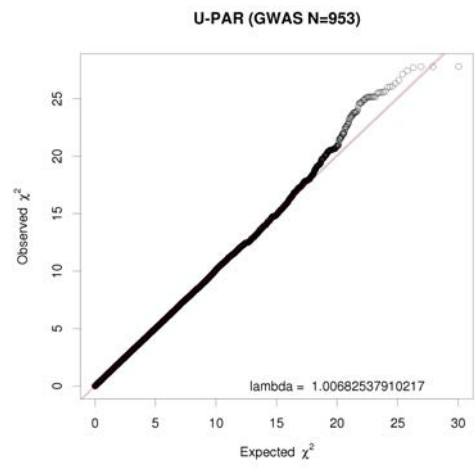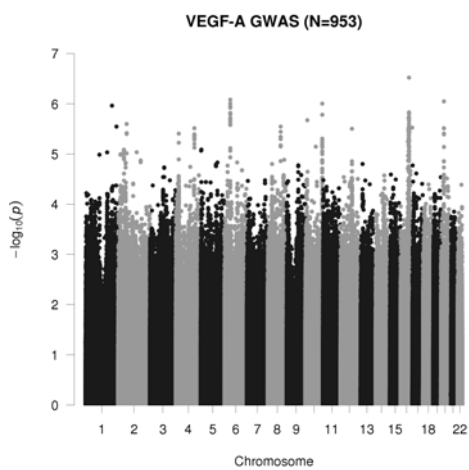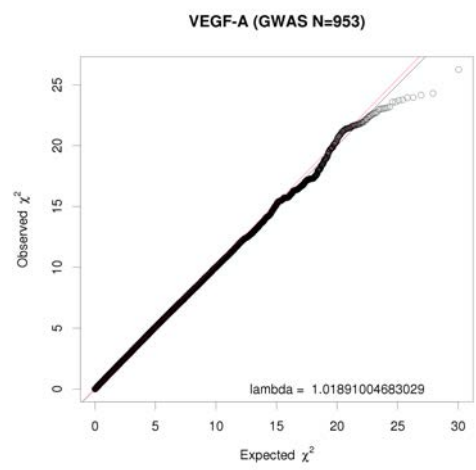



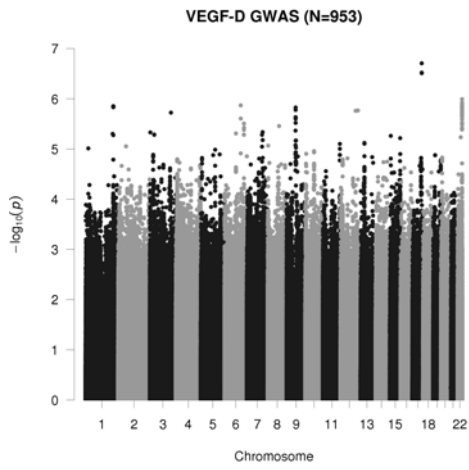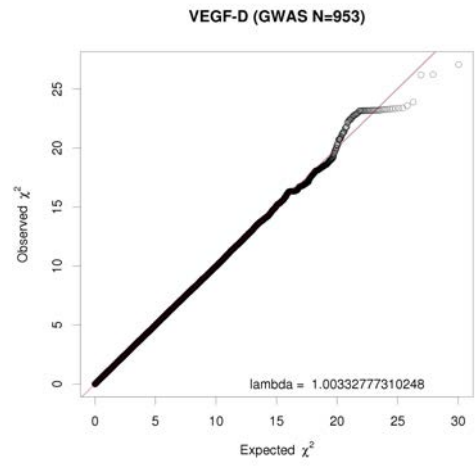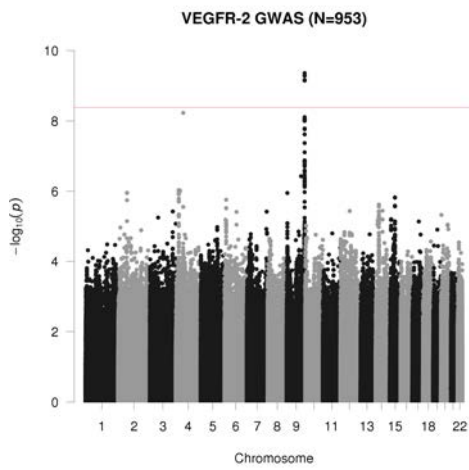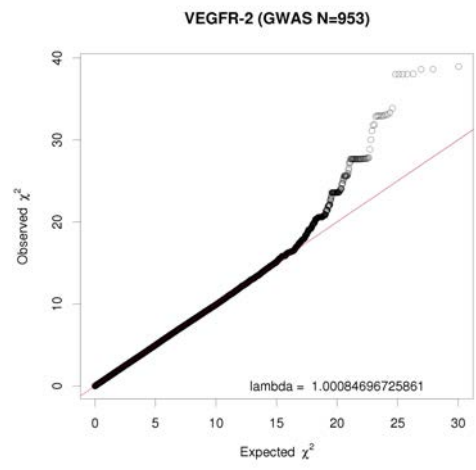

Supplement: pgen.1007005.s002.pdf [file pgen.1007005.s002.pdf]
