# Supplementary material for: The relative contribution of DNA methylation and genetic variants on protein biomarkers for human diseases
Source: PubMed Central journal article supplement (PMC5617224; doi:10.1371/journal.pgen.1007005), 2017-09-15

**Supplemental Fig S3. Manhattan plots and QQ plots for EWAS results for all analyzed biomarkers.**

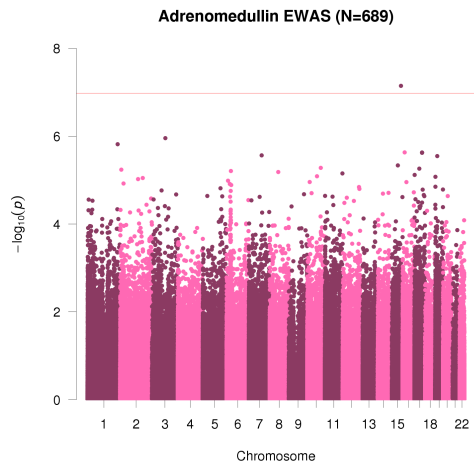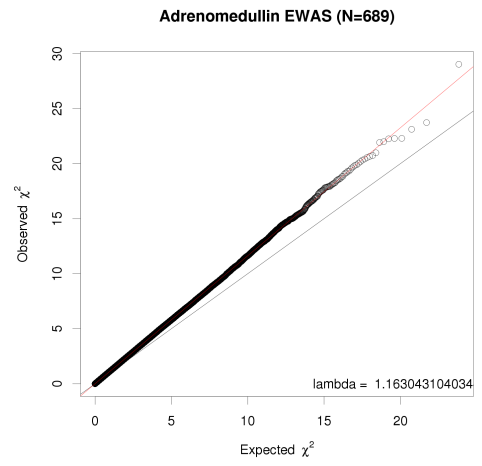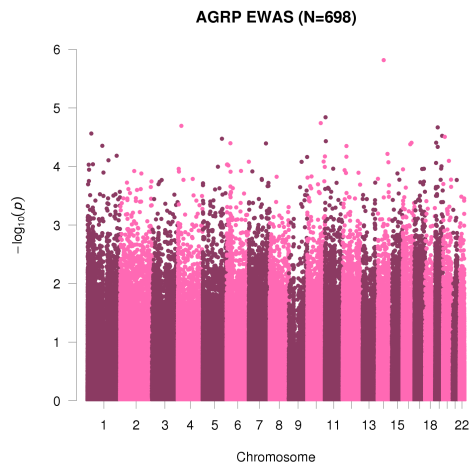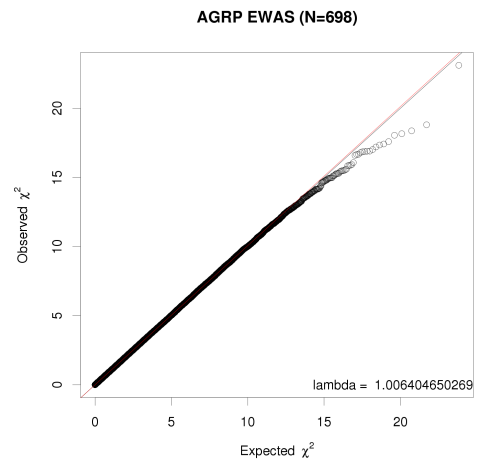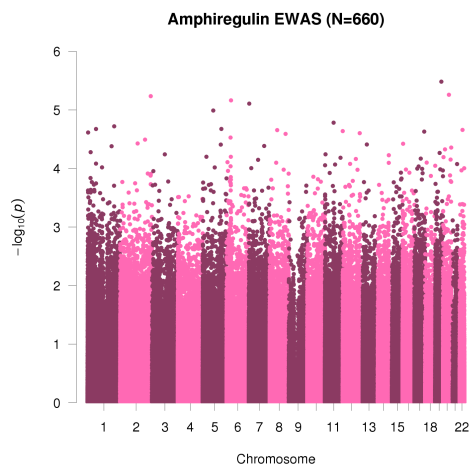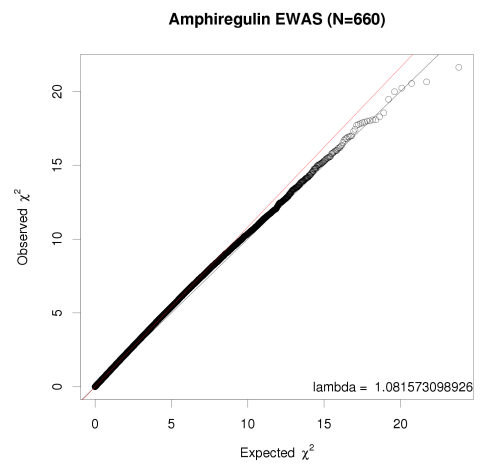

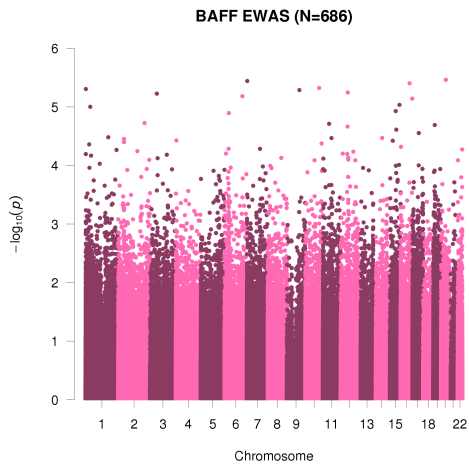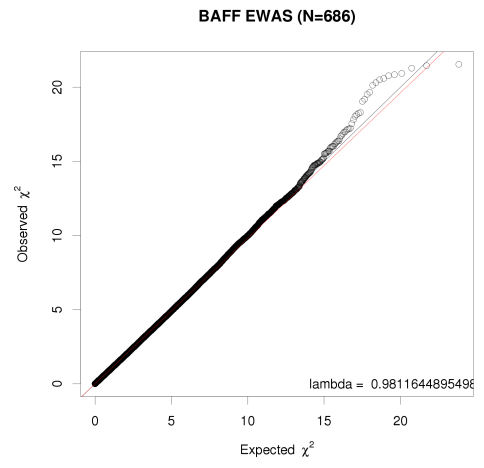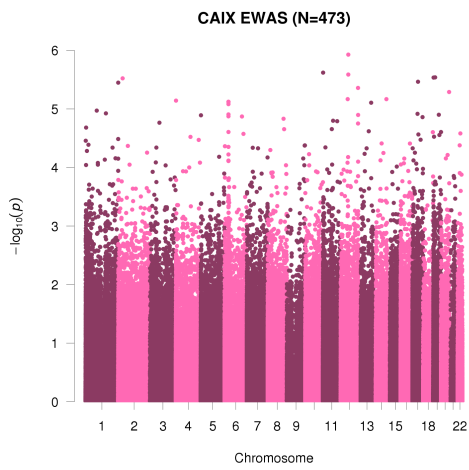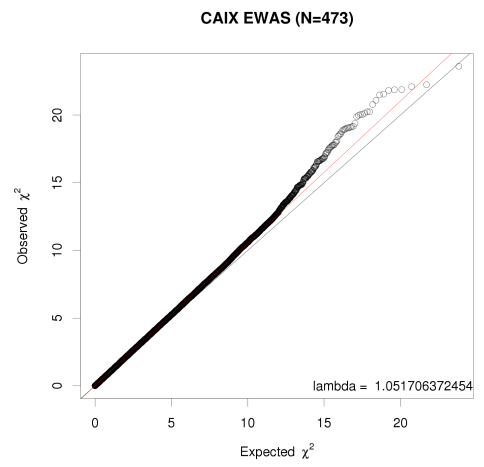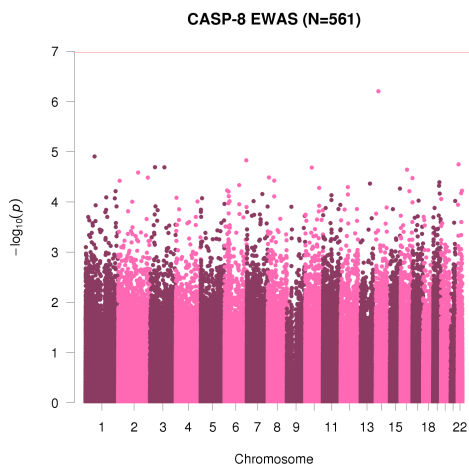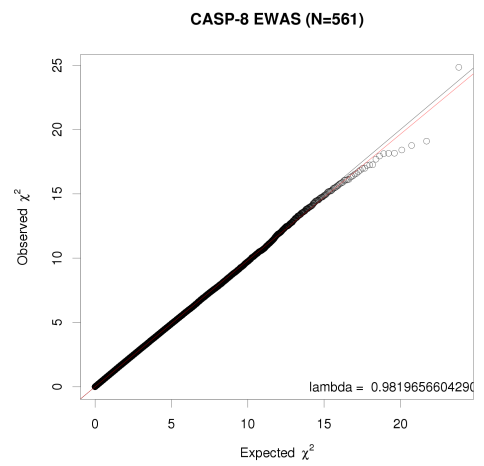

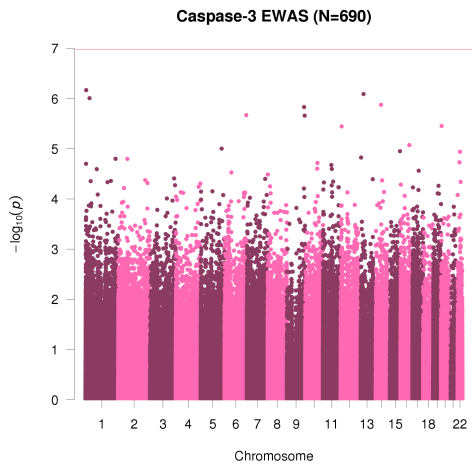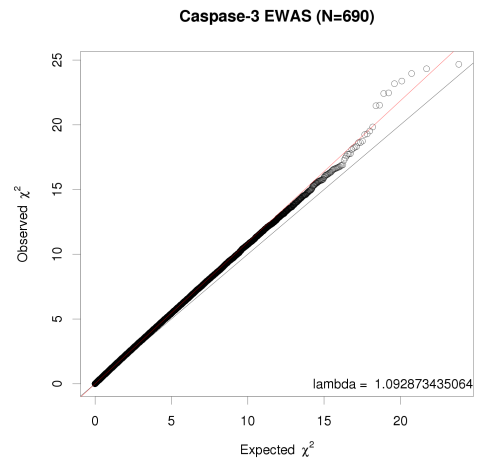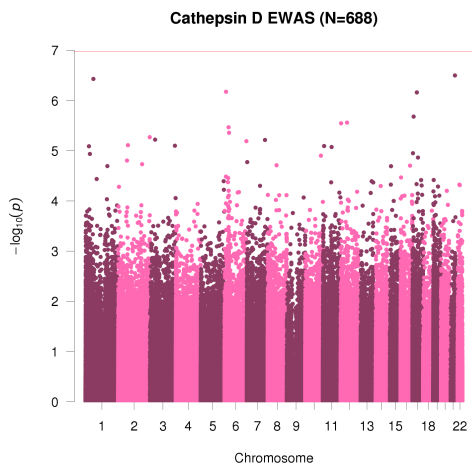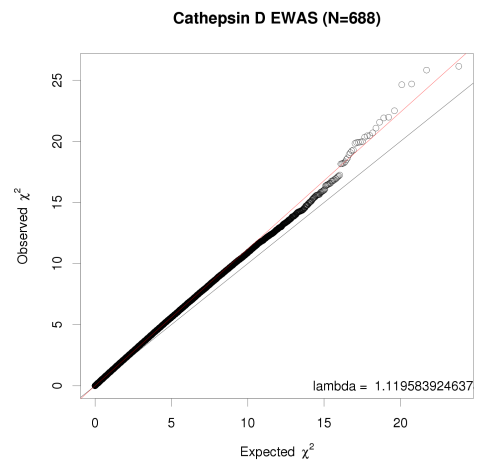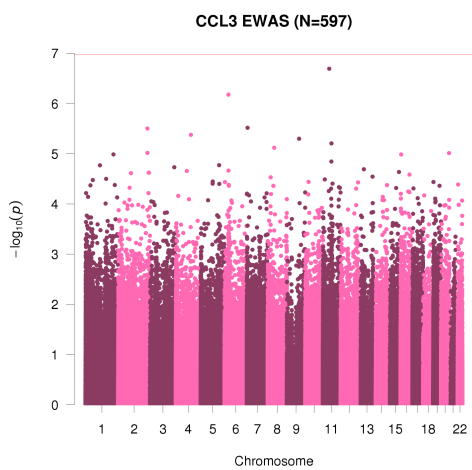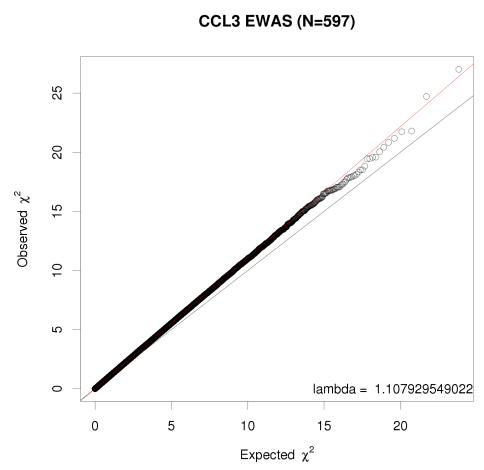

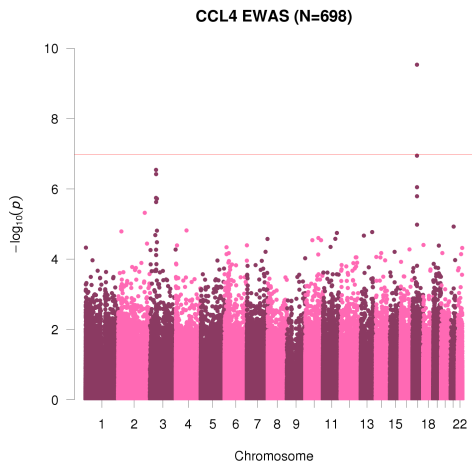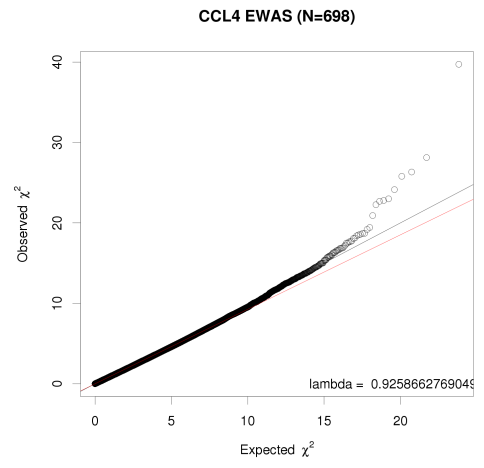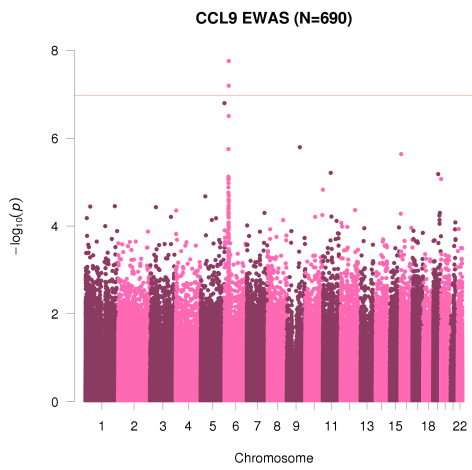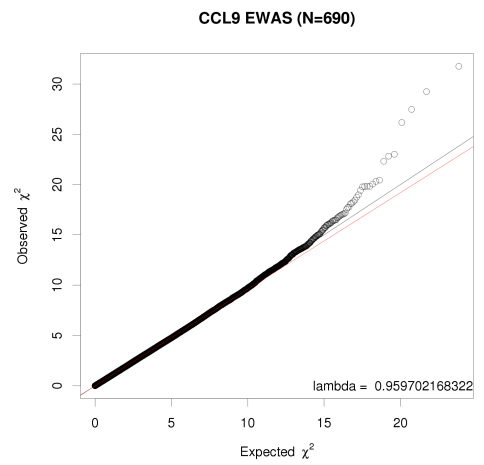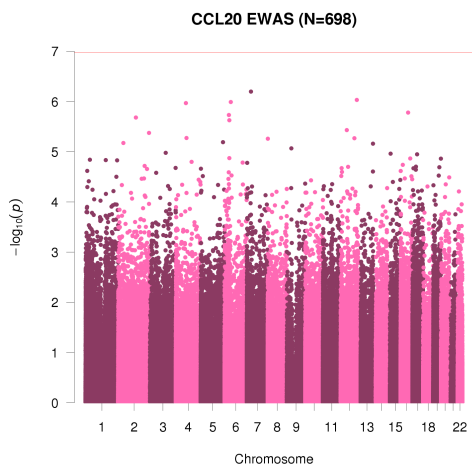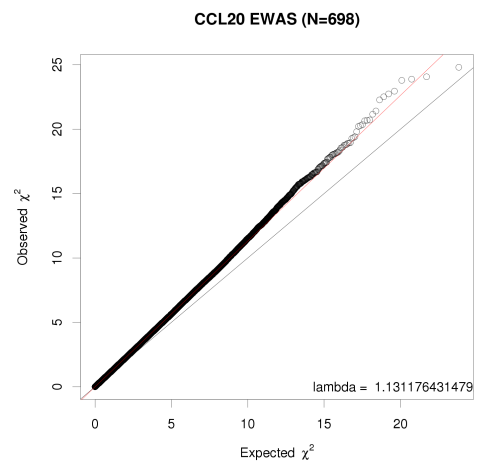

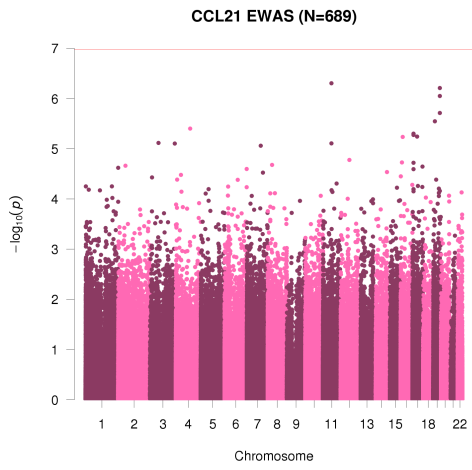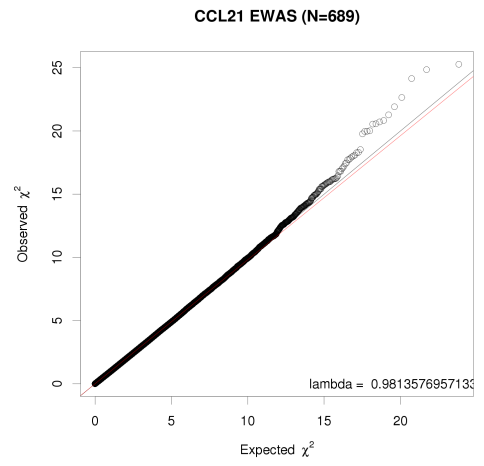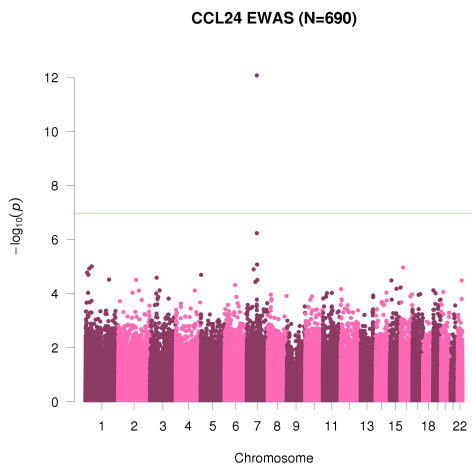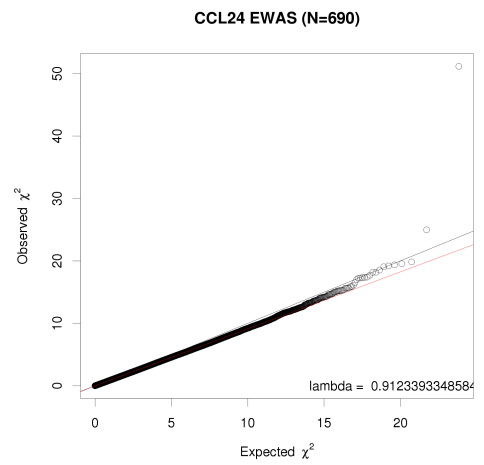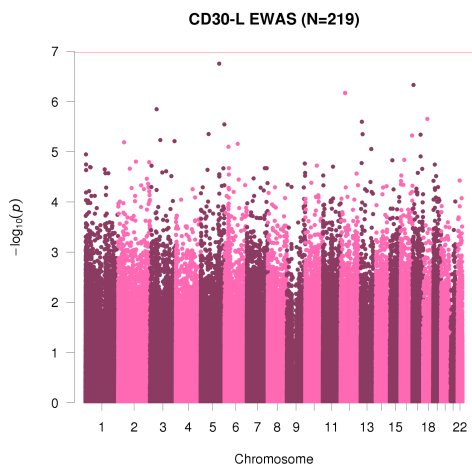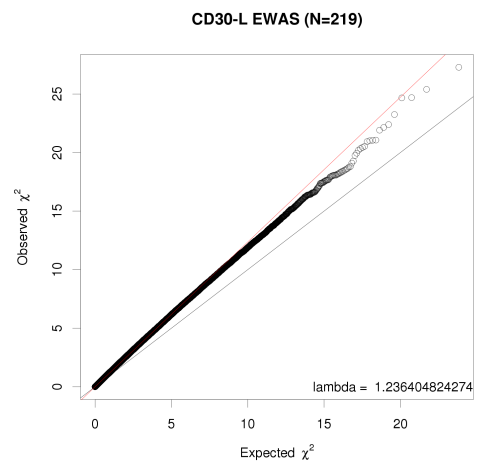

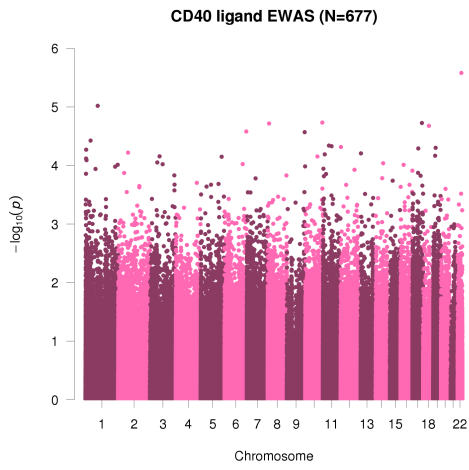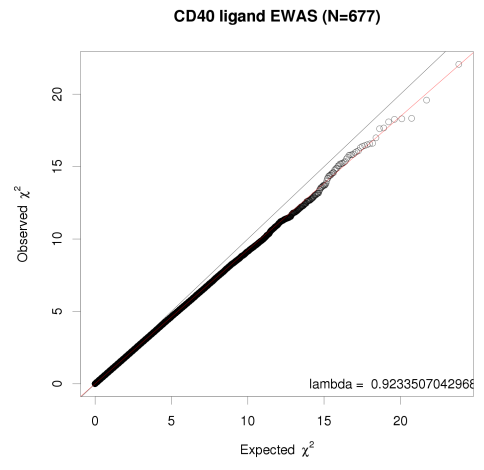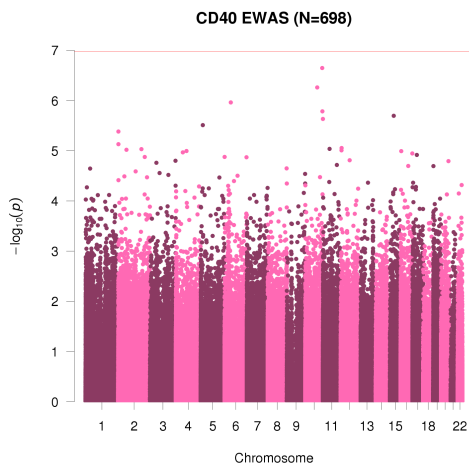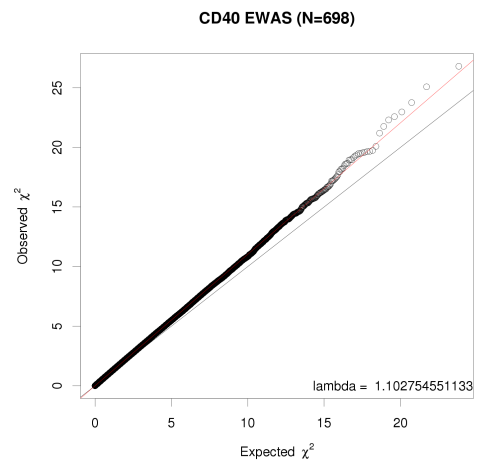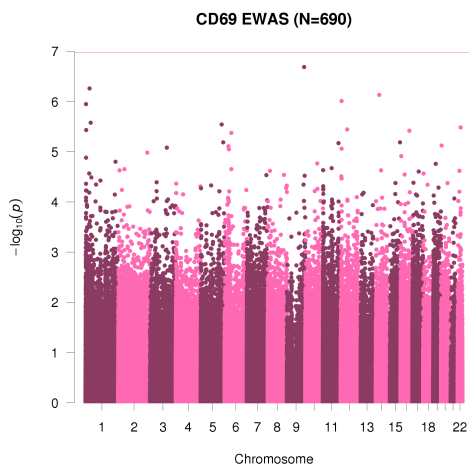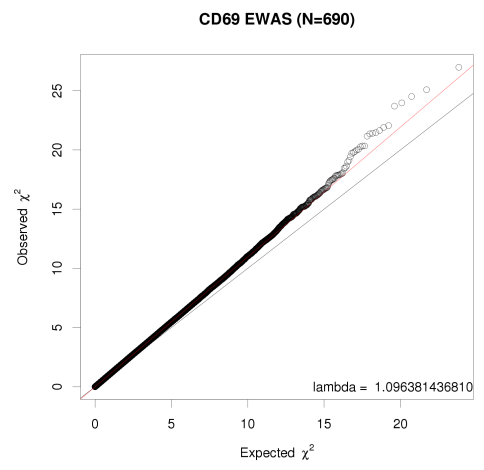

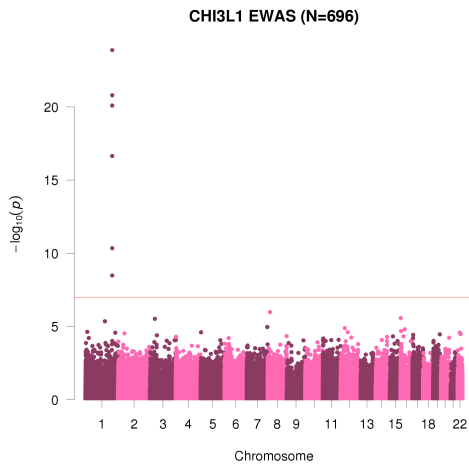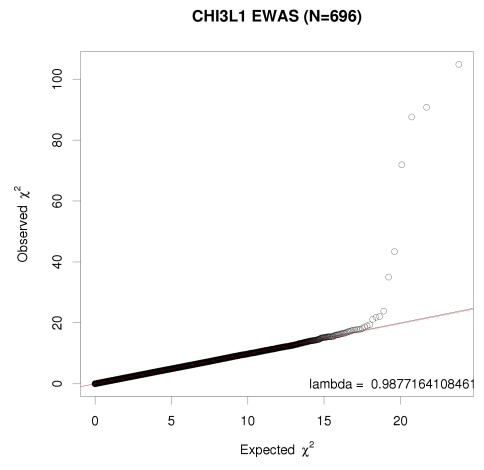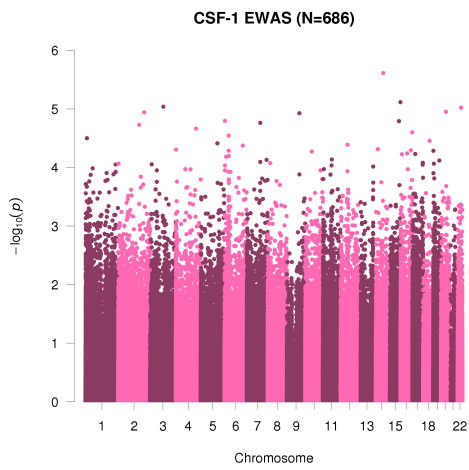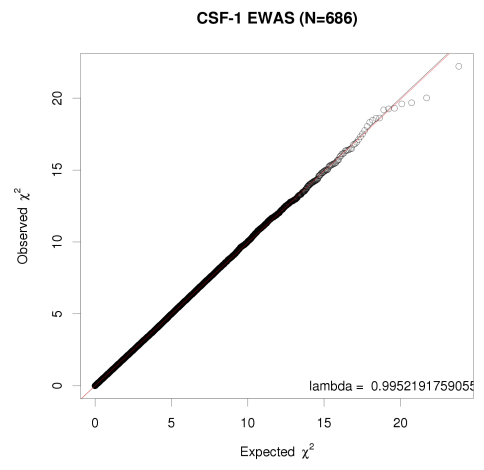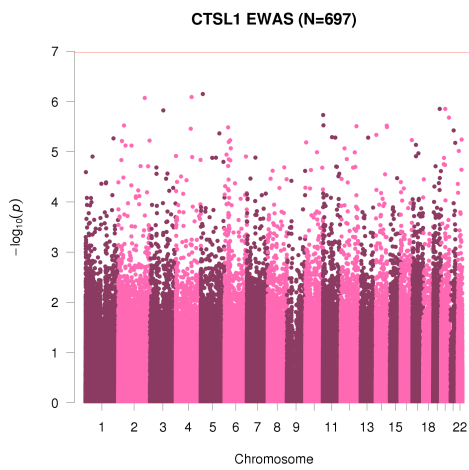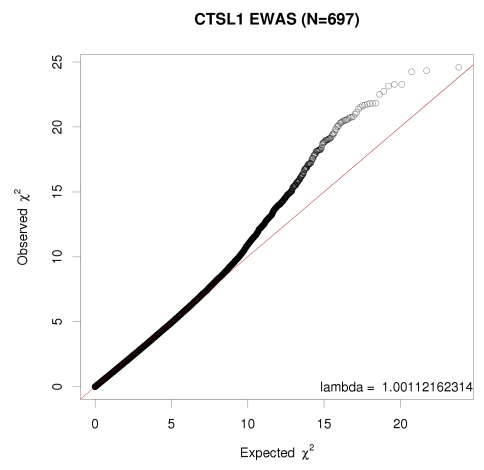

CX3CL1 EWAS (N=698)

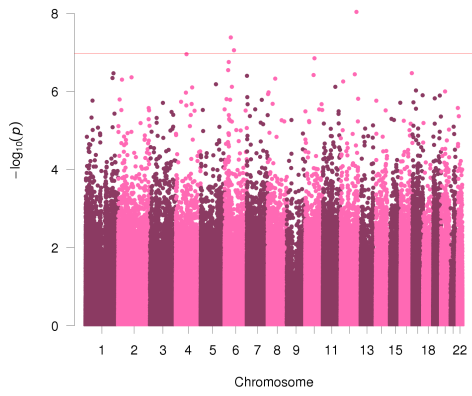

CX3CL1 EWAS (N=698)

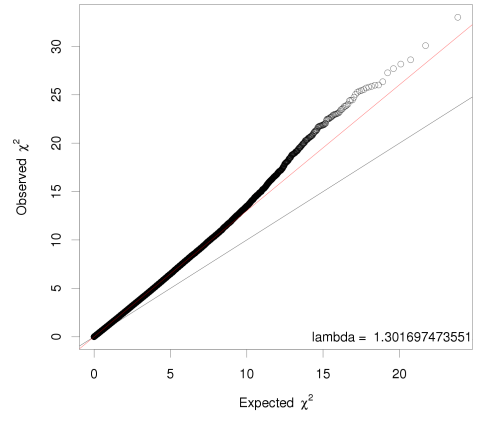

CXCL1 EWAS (N=698)

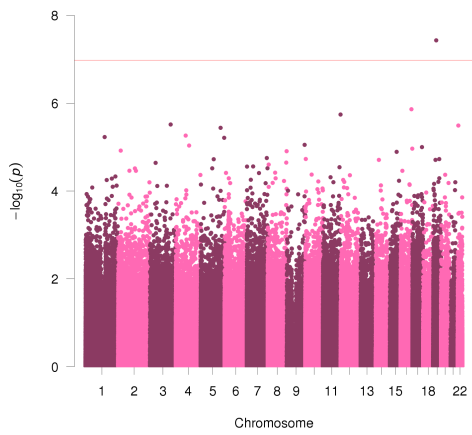

CXCL1 EWAS (N=698)

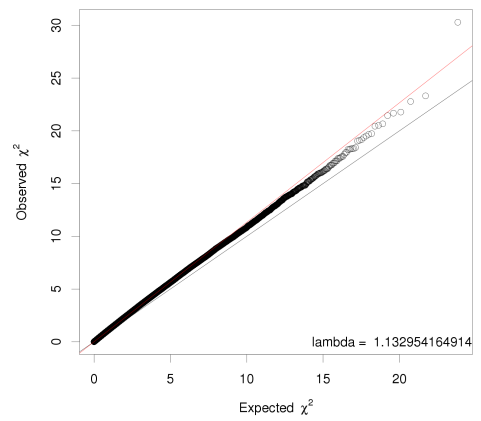

CXCL5 EWAS (N=690)

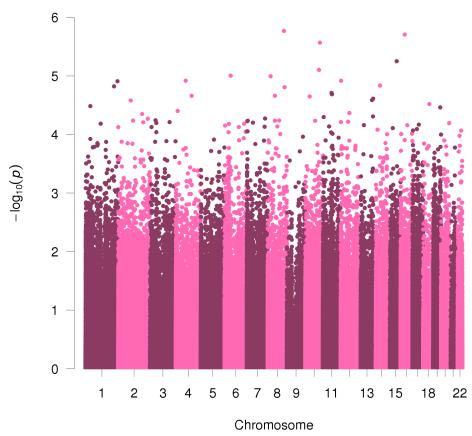

CXCL5 EWAS (N=690)

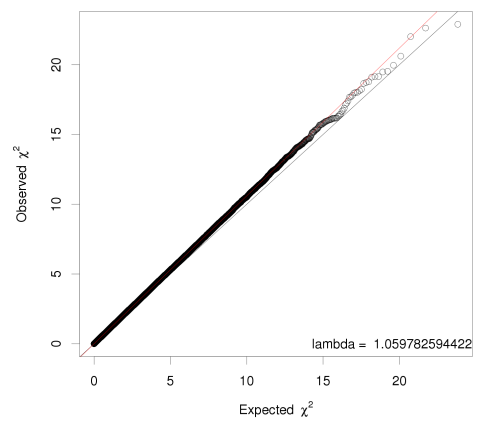



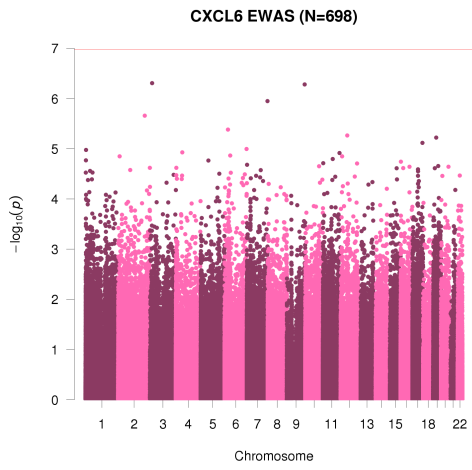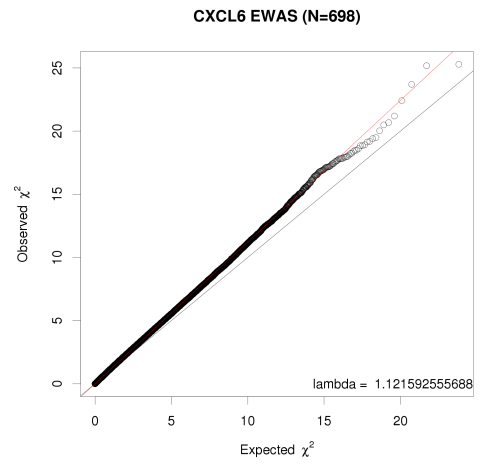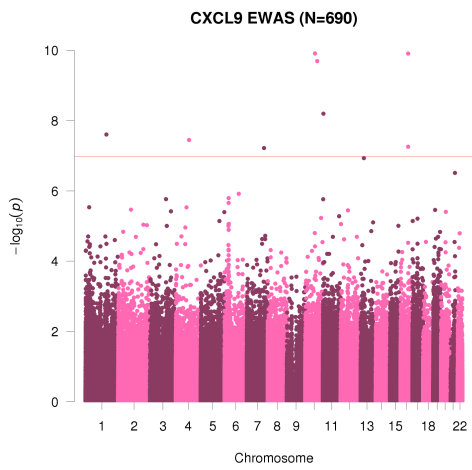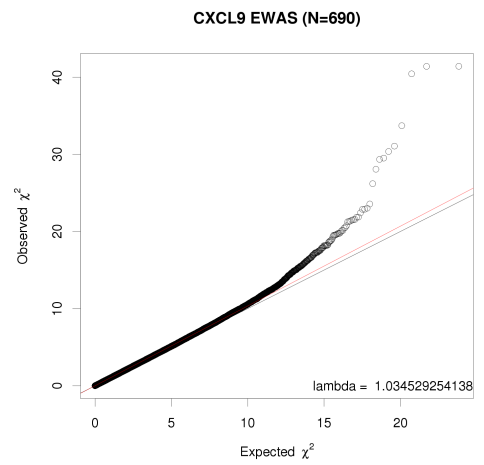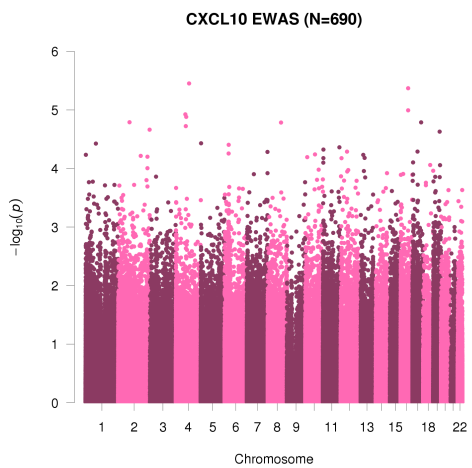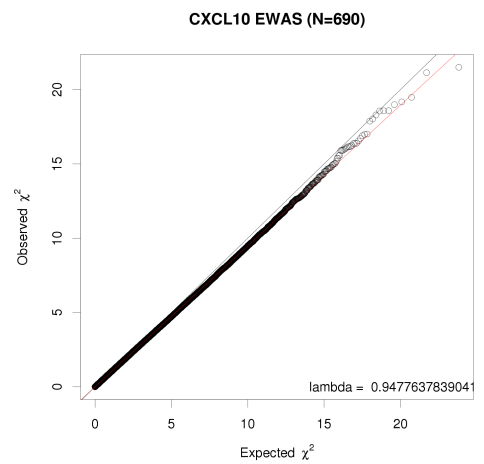

CXCL11 EWAS (N=690)

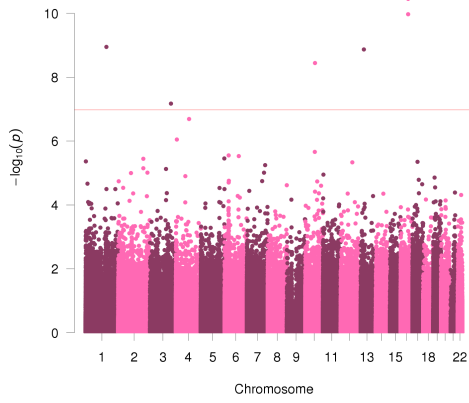

CXCL11 EWAS (N=690)

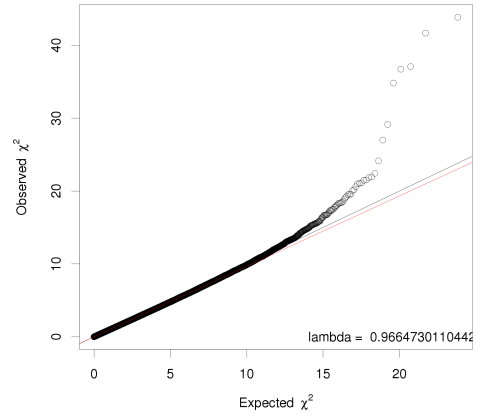

CXCL13 EWAS (N=690)

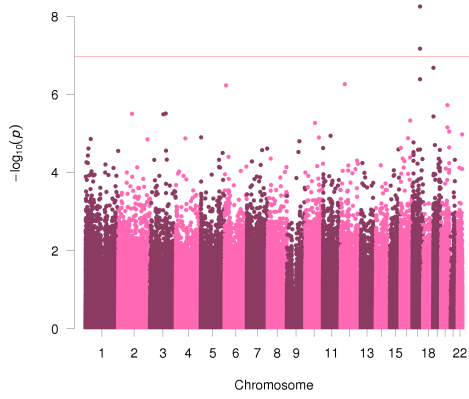

CXCL13 EWAS (N=690)

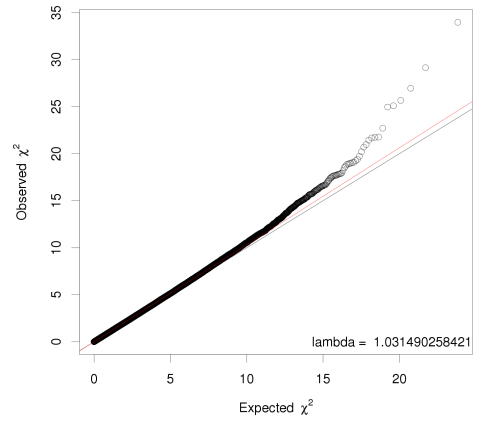

CXCL16 EWAS (N=698)

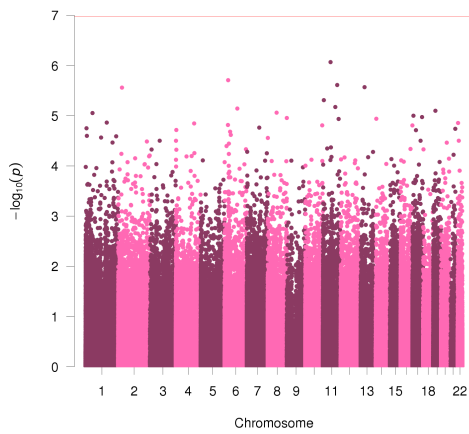

CXCL16 EWAS (N=698)

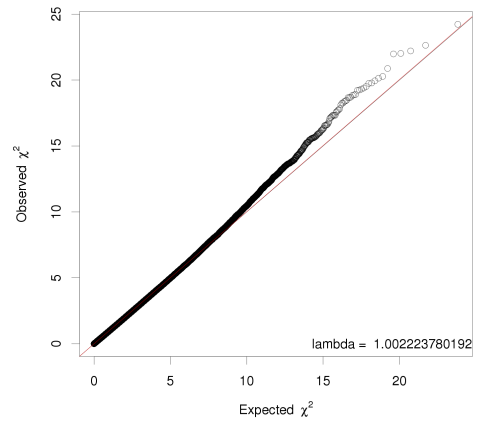

Cystatin B EWAS (N=682)

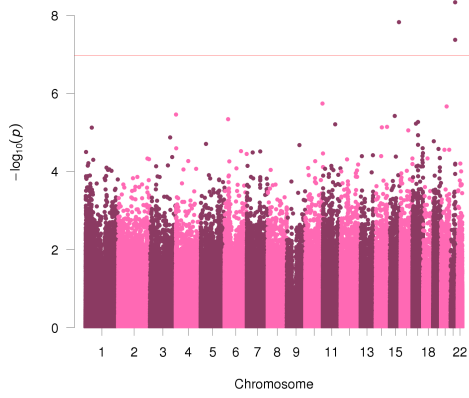

Cystatin B EWAS (N=682)

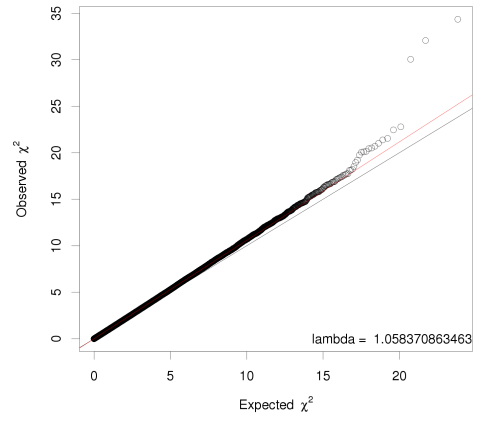

Dkk-1 EWAS (N=698)

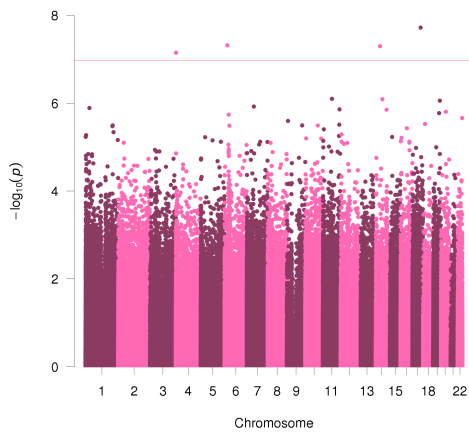

Dkk-1 EWAS (N=698)

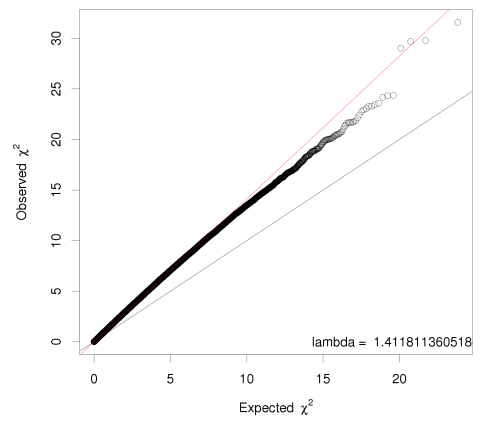

E-selectin EWAS (N=690)

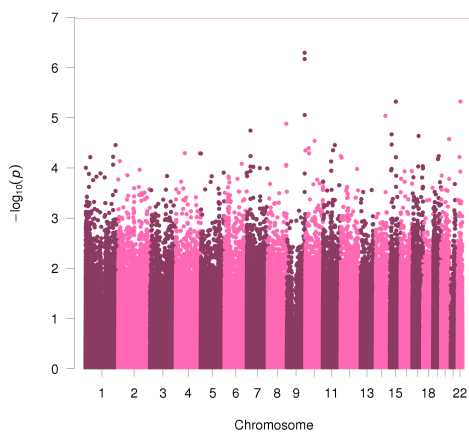

E-selectin EWAS (N=690)

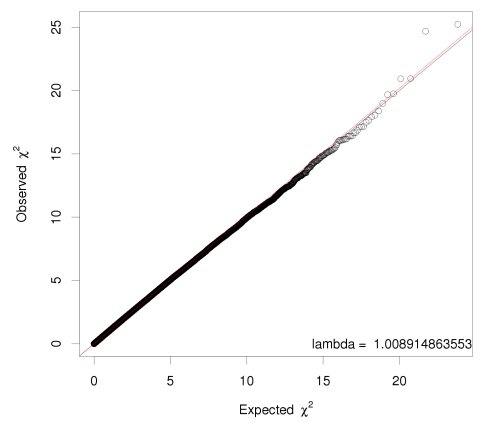

ECP EWAS (N=698)

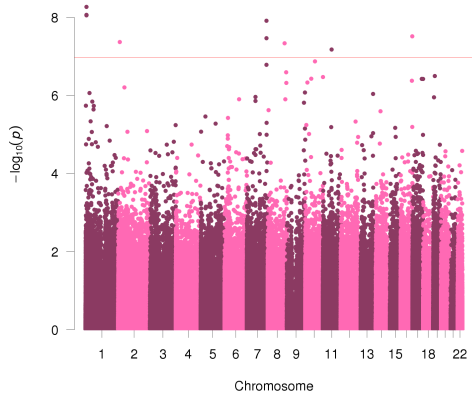

ECP EWAS (N=698)

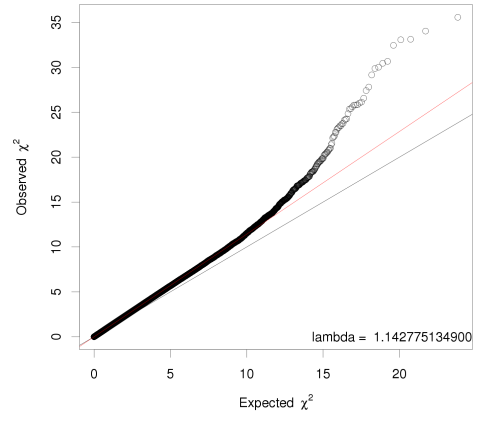

EGF EWAS (N=690)

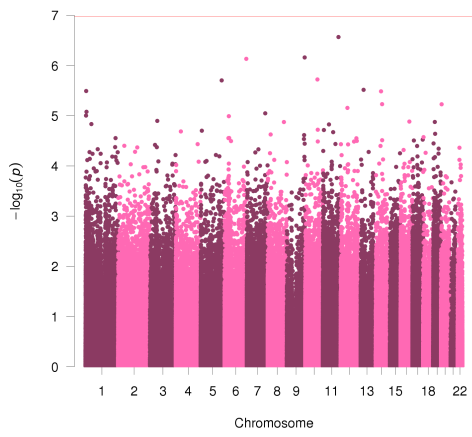

EGF EWAS (N=690)

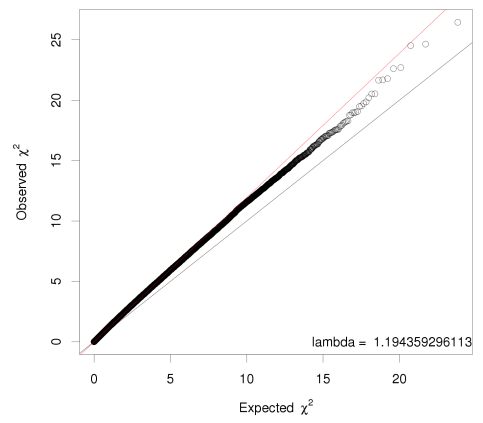

EGFR EWAS (N=688)

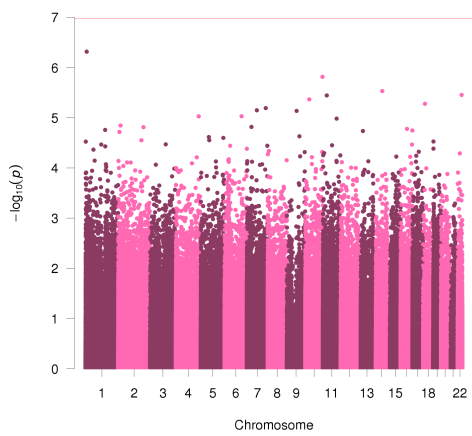

EGFR EWAS (N=688)

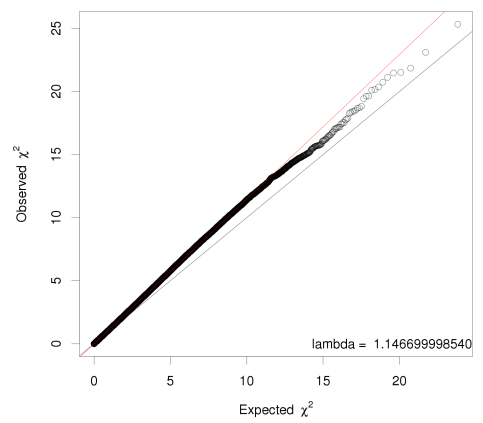

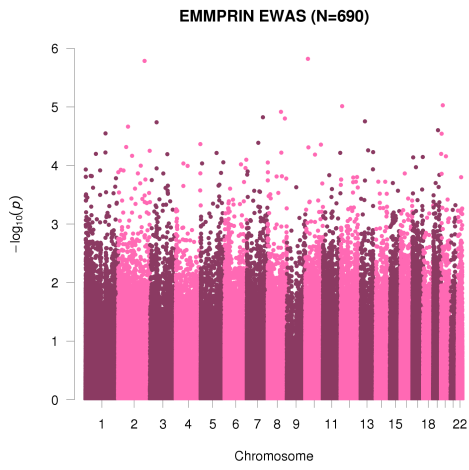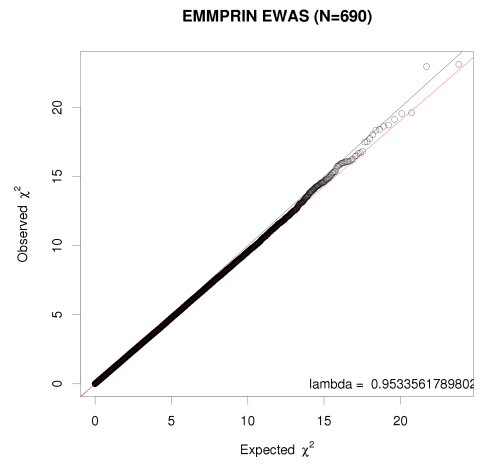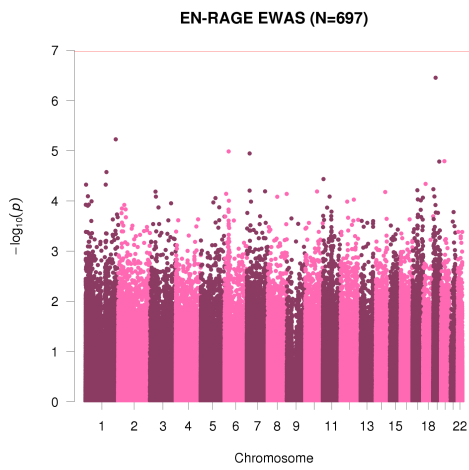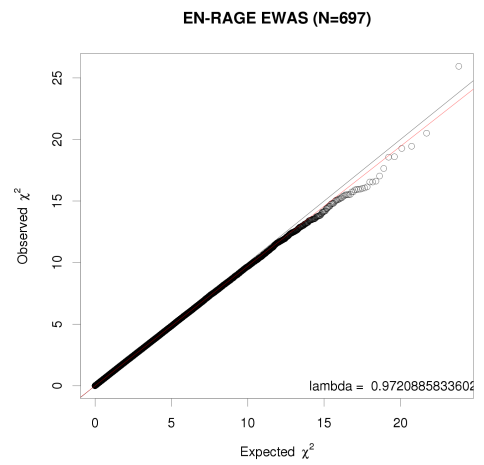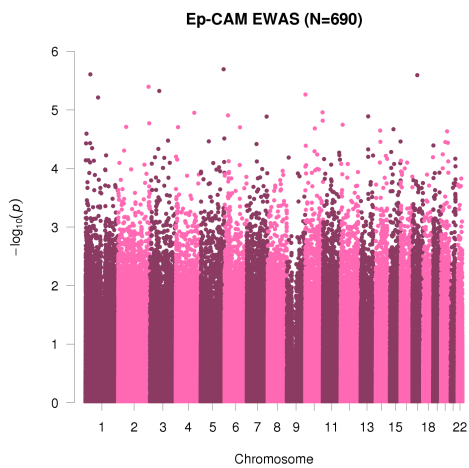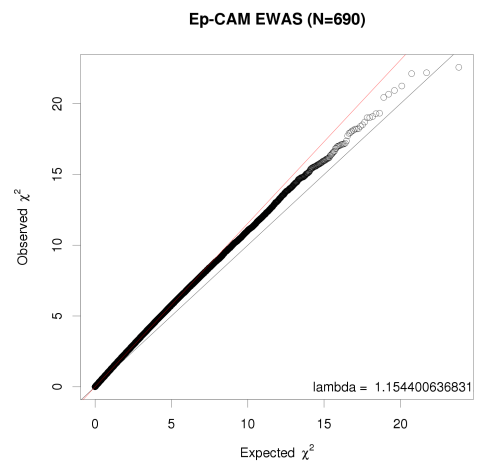

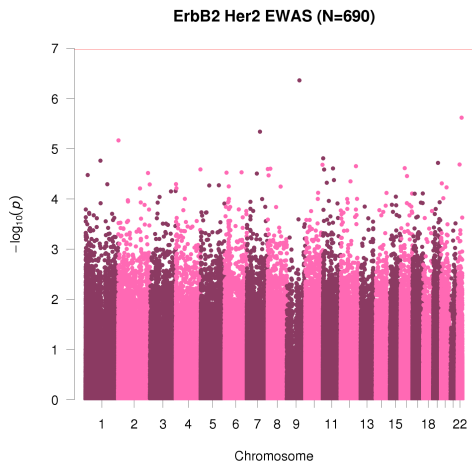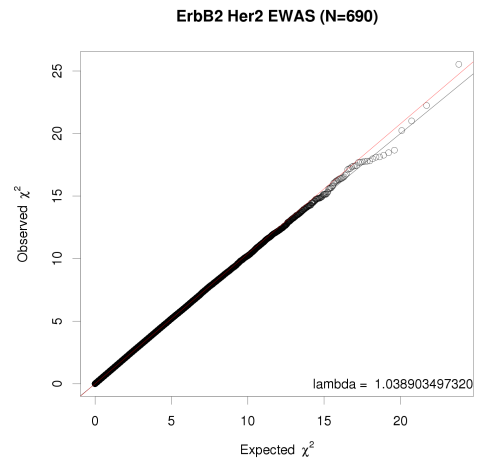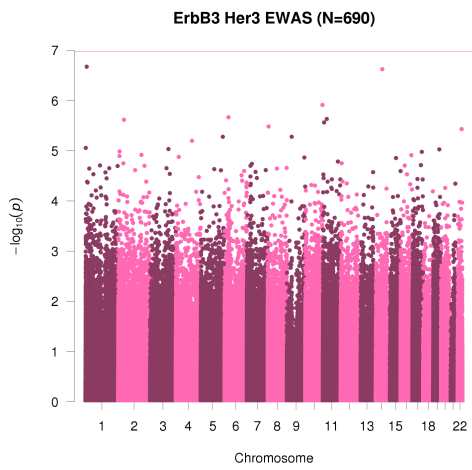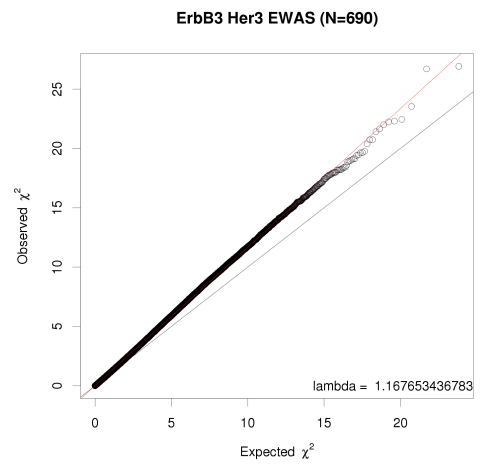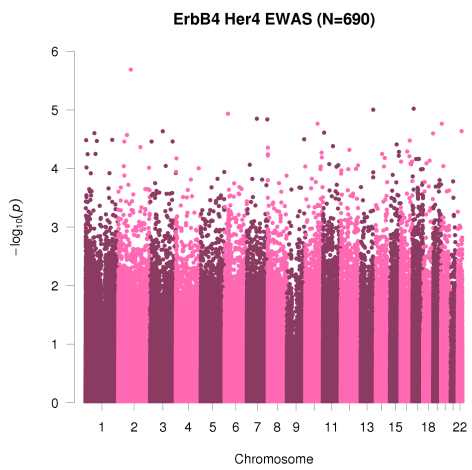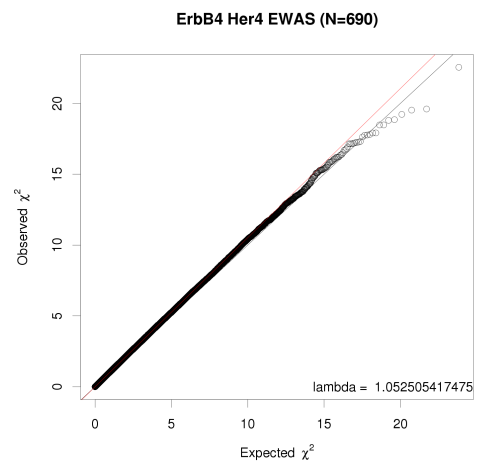

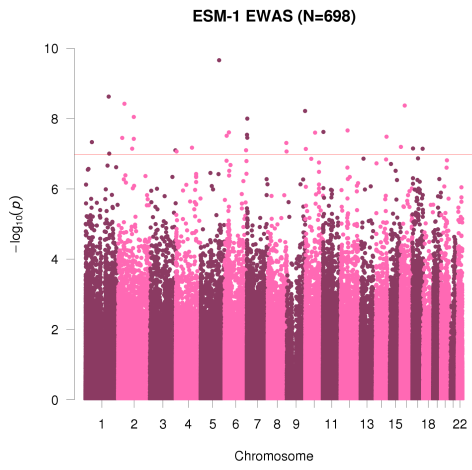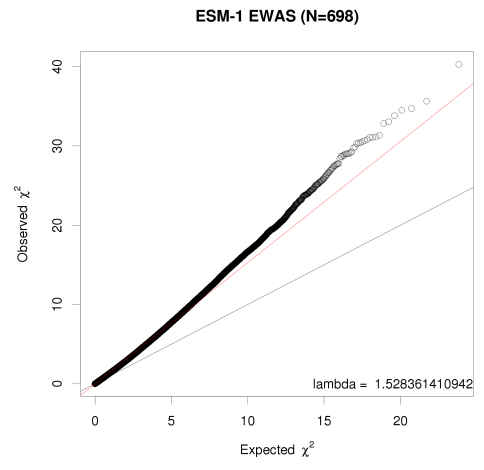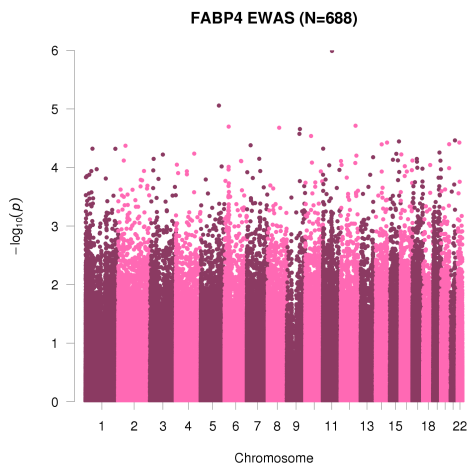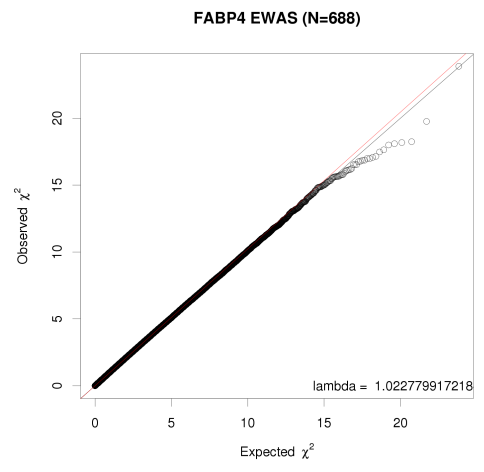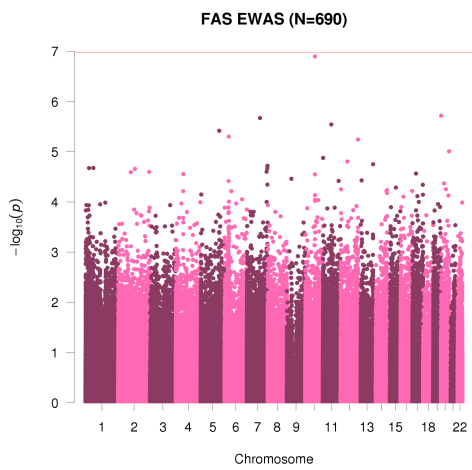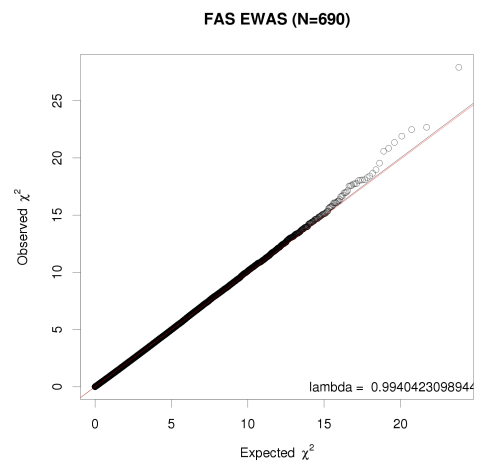

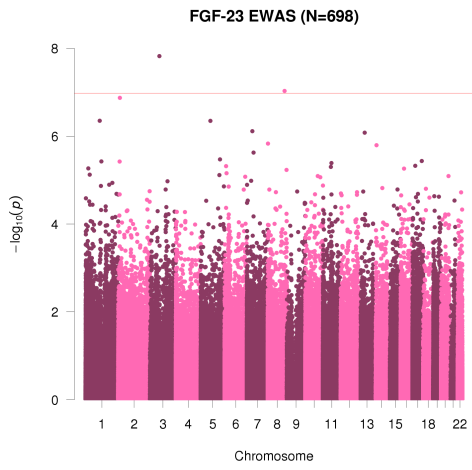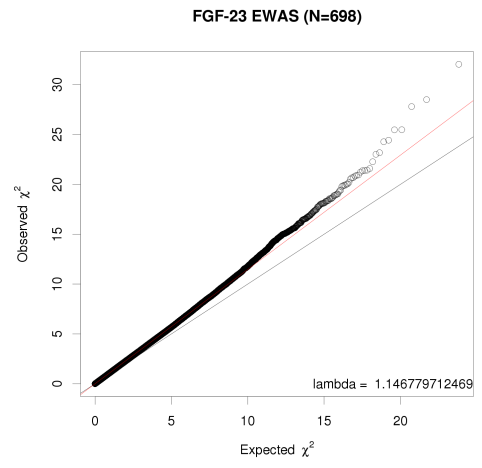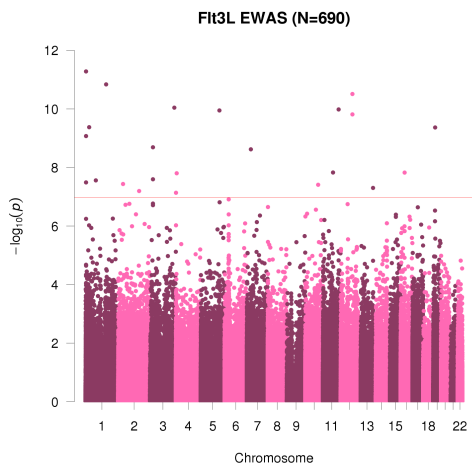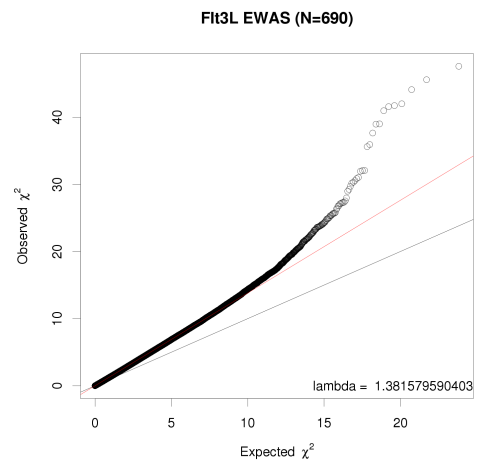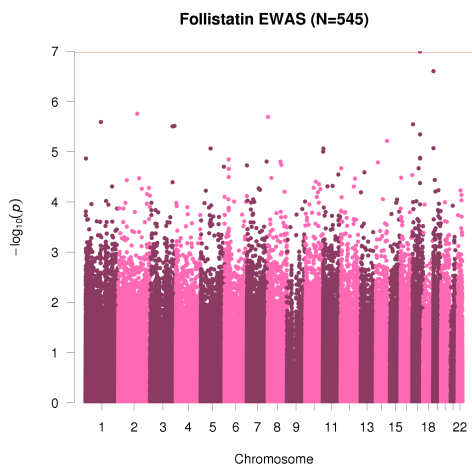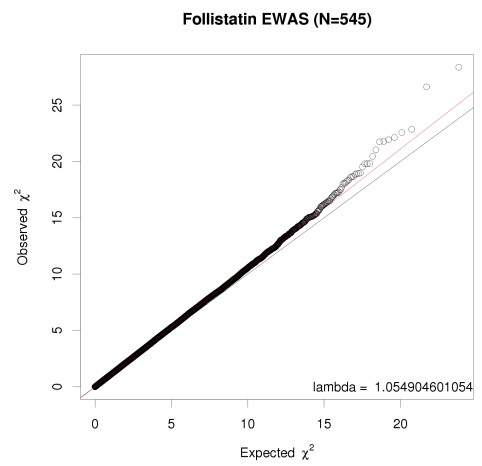



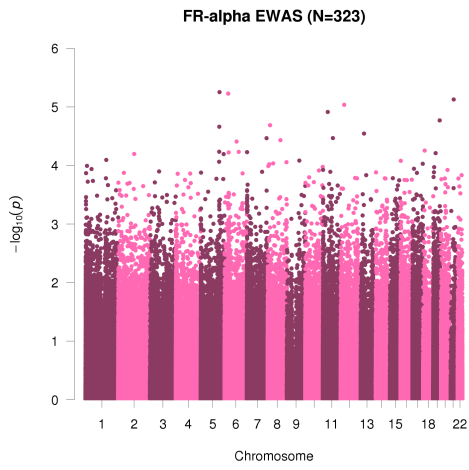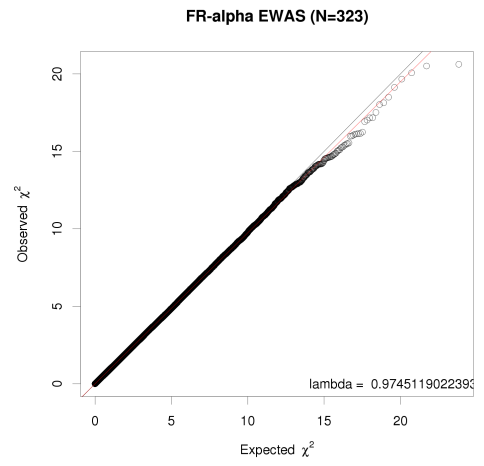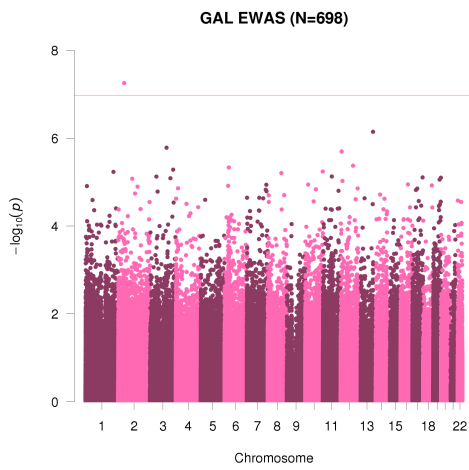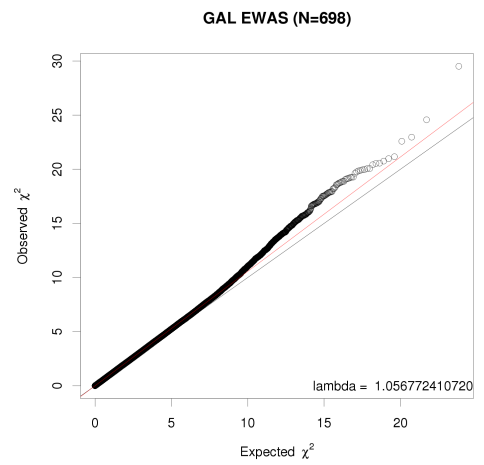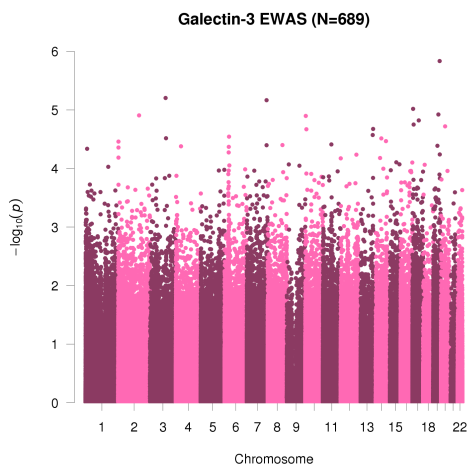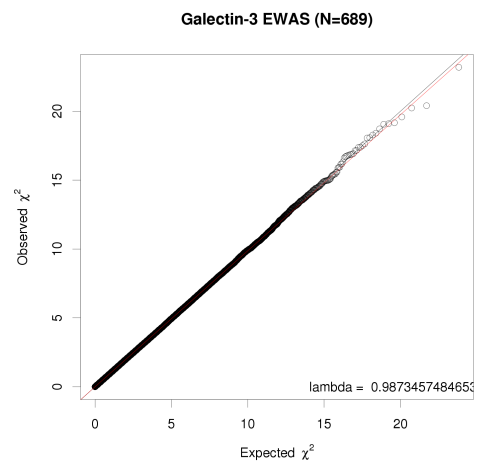

GDF-15 EWAS (N=689)

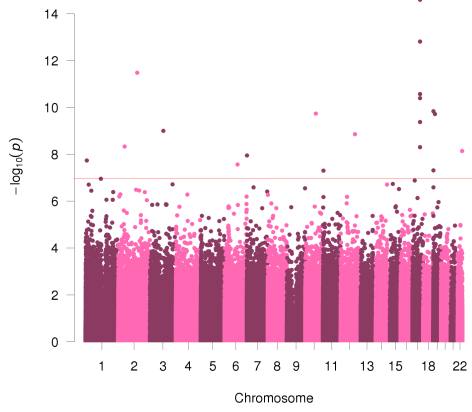

GDF-15 EWAS (N=689)

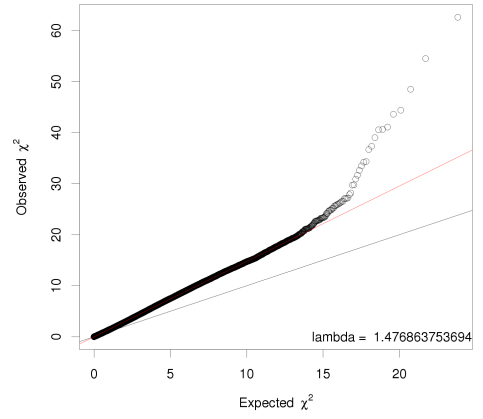

Growth Hormone EWAS (N=690)

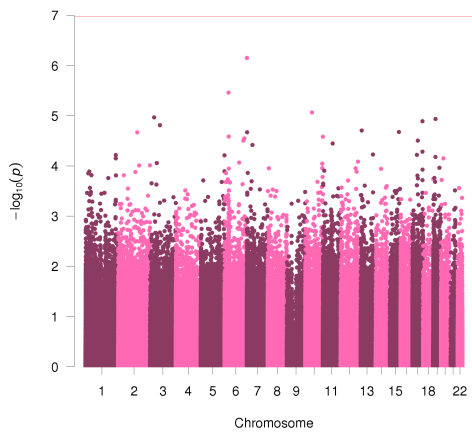

Growth Hormone EWAS (N=690)

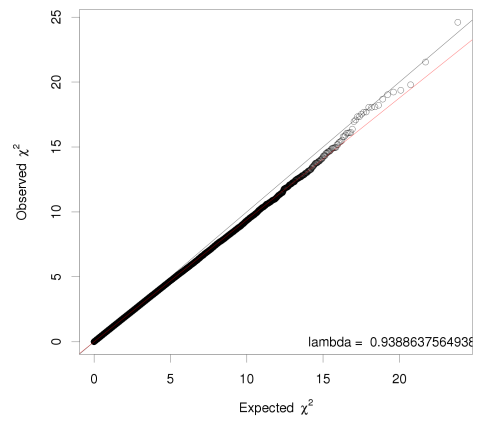

HB-EGF EWAS (N=698)

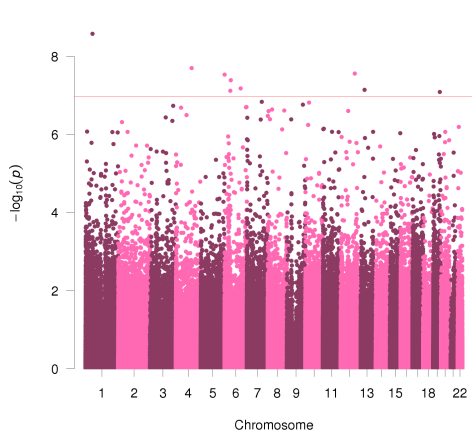

HB-EGF EWAS (N=698)

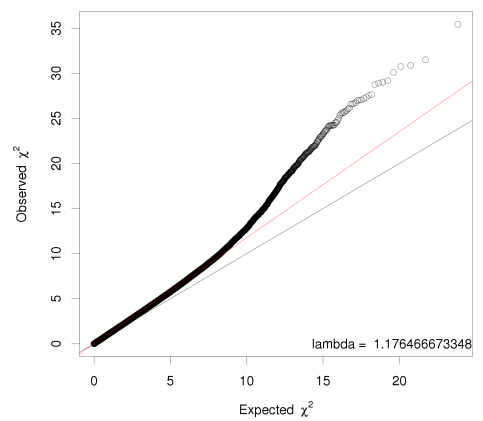

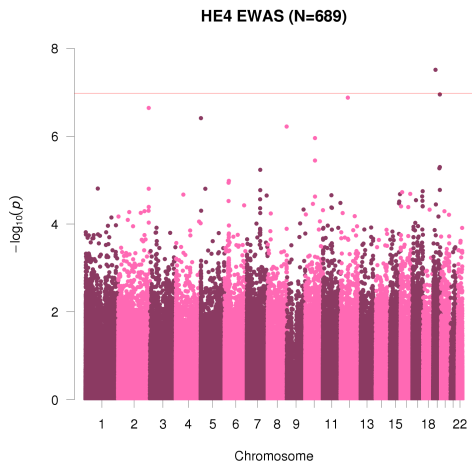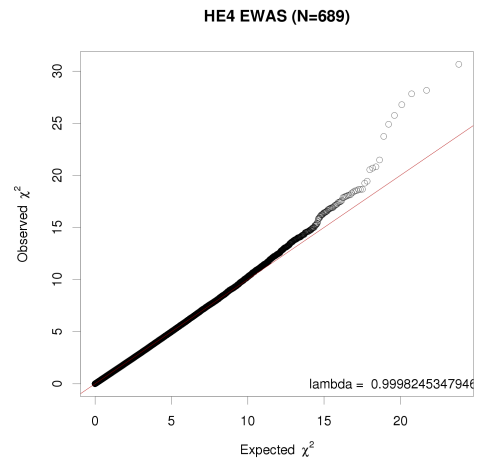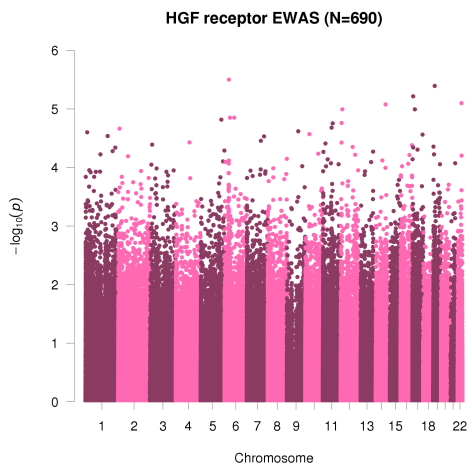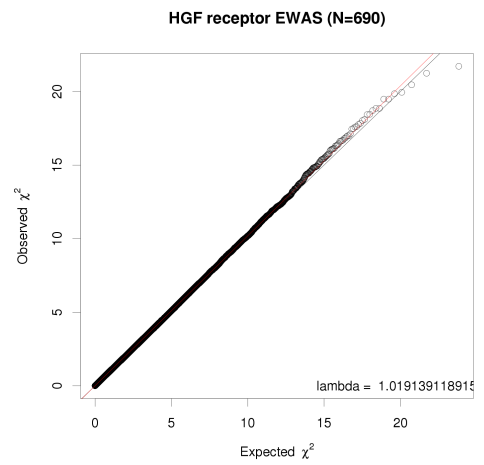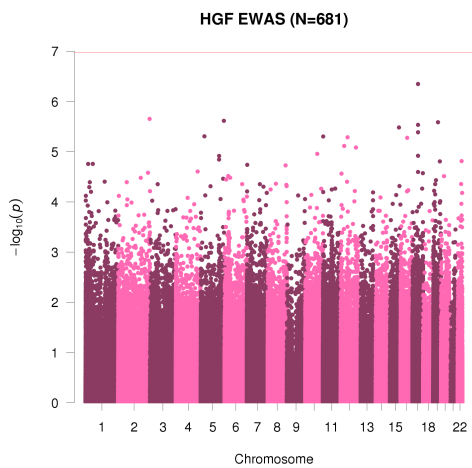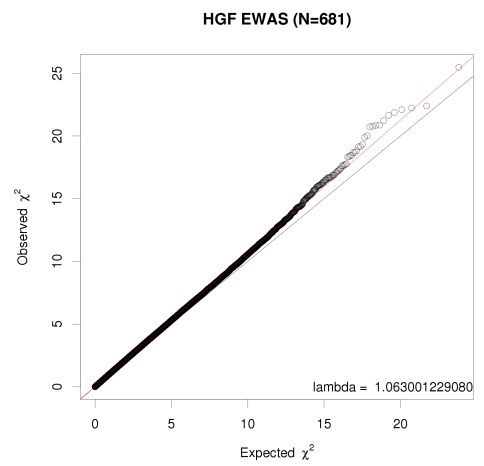

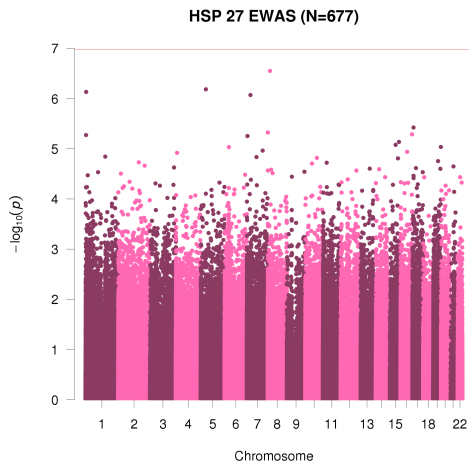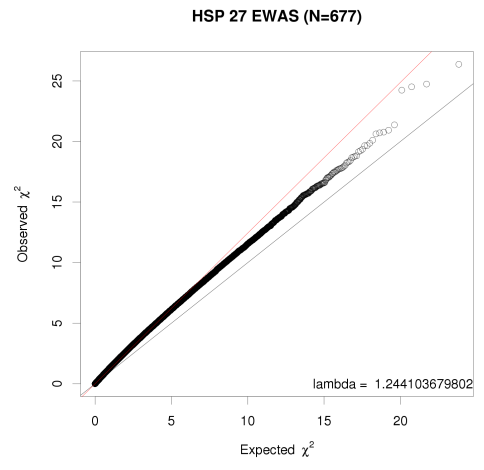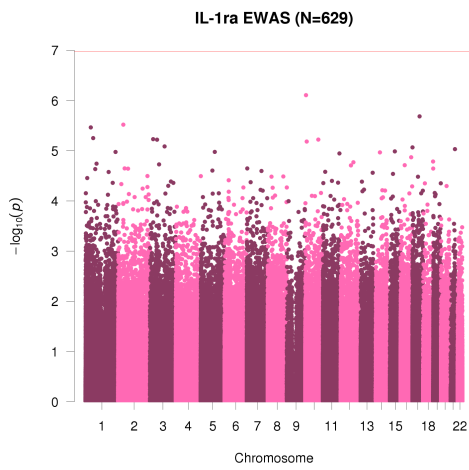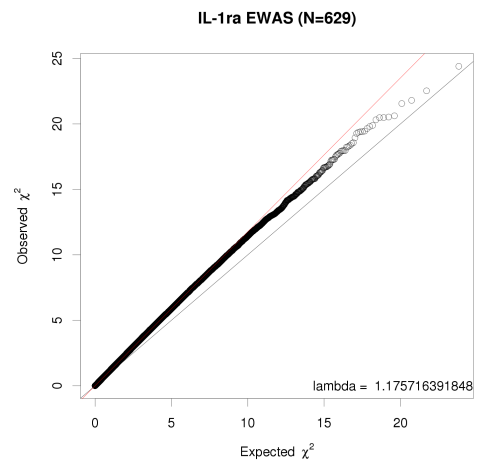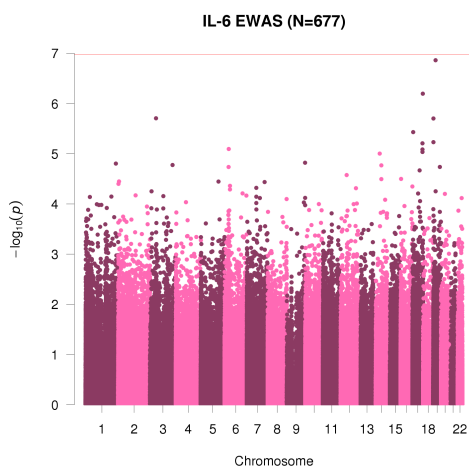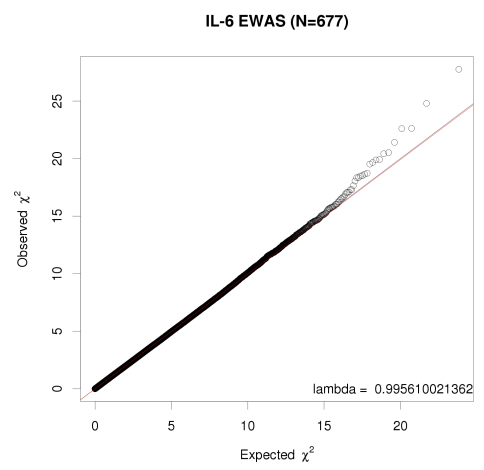

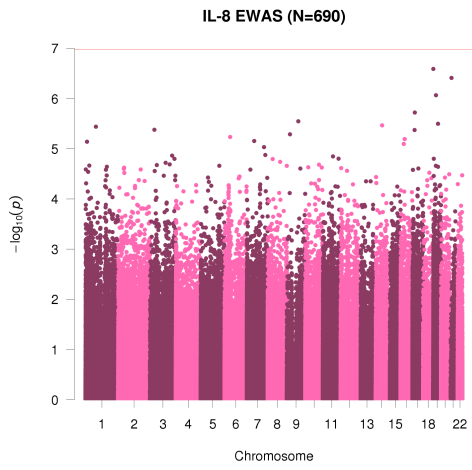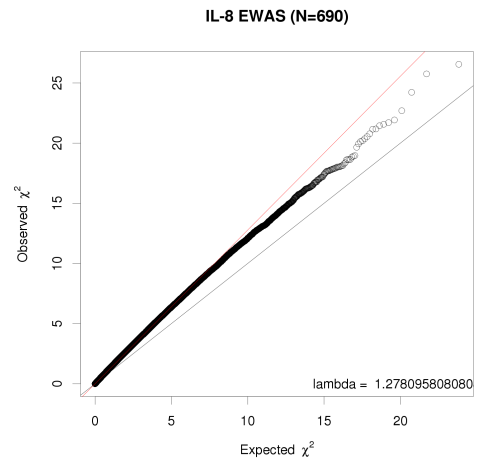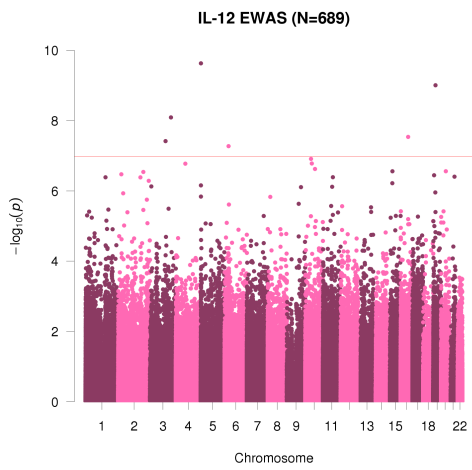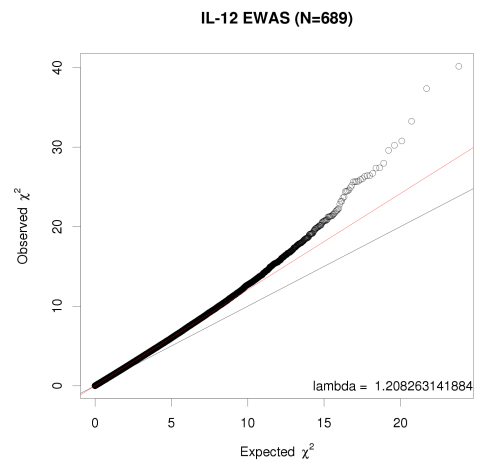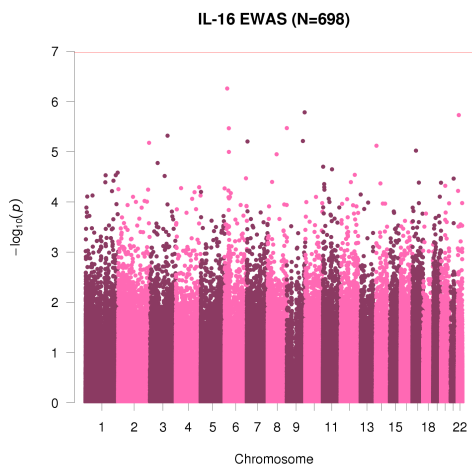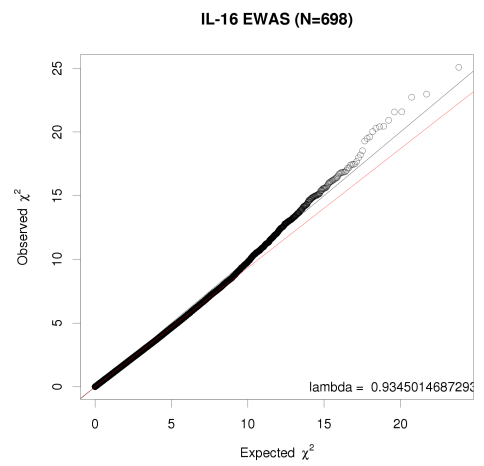

IL-18 EWAS (N=698)

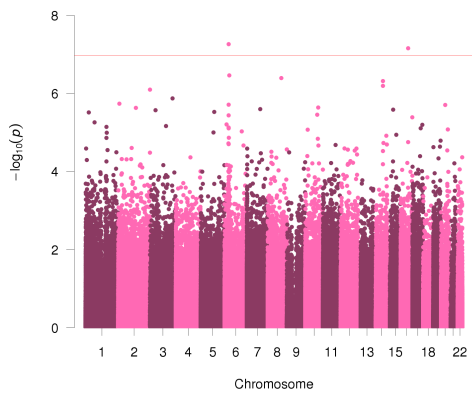

IL-18 EWAS (N=698)

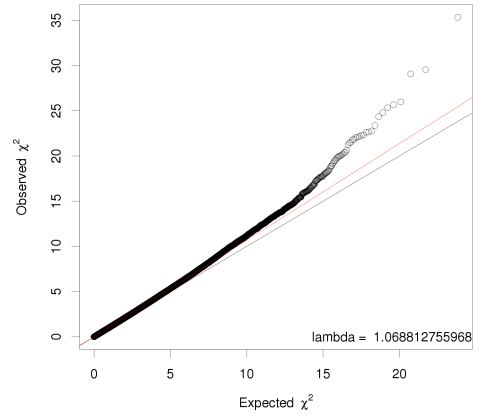

IL2RA EWAS (N=690)

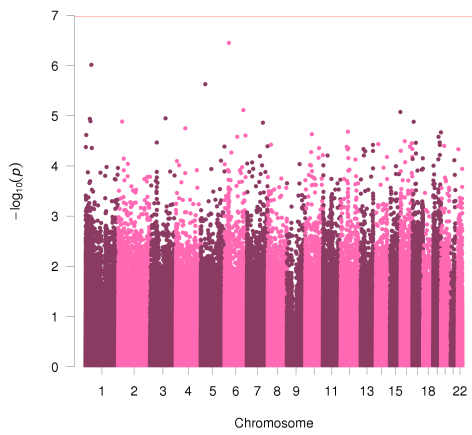

IL2RA EWAS (N=690)

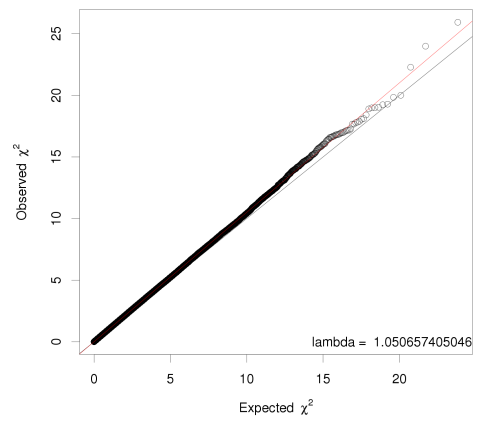

IL6RA EWAS (N=690)

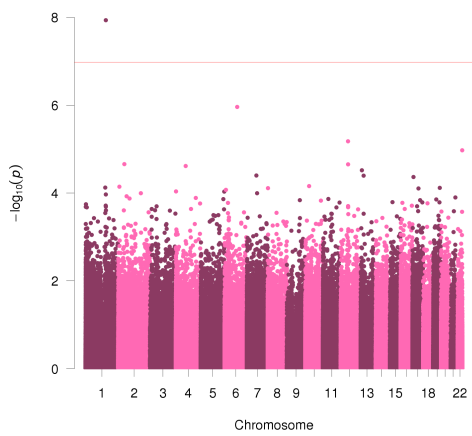

IL6RA EWAS (N=690)

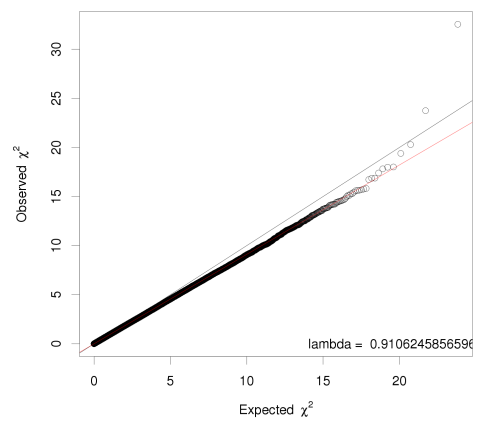

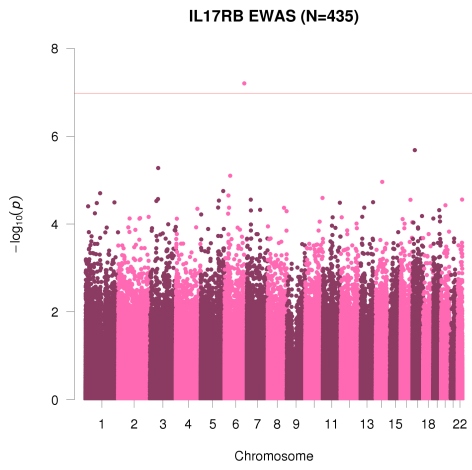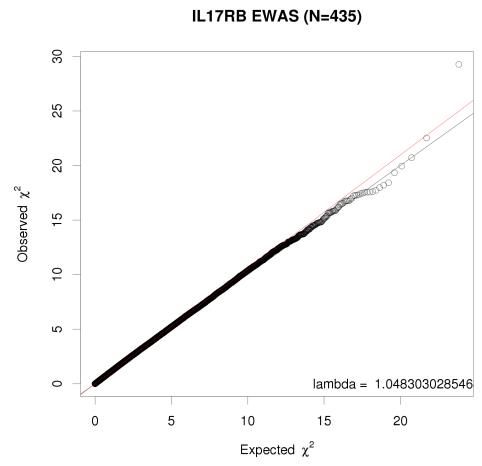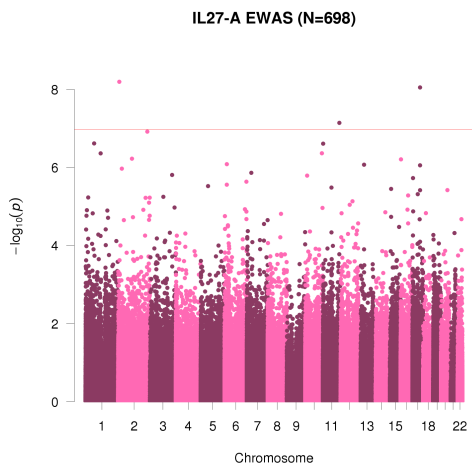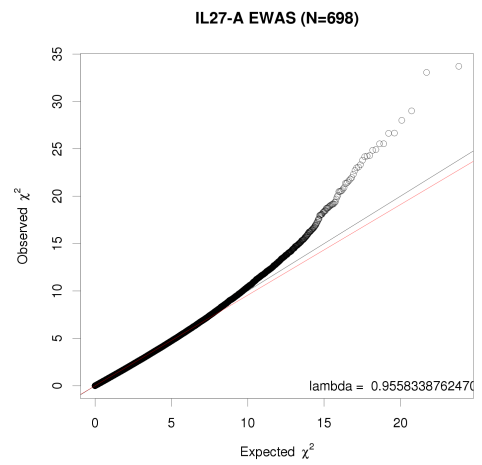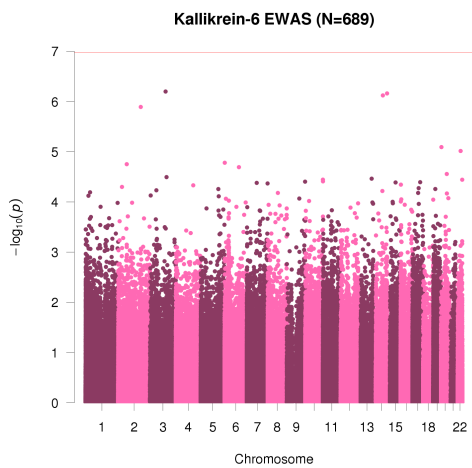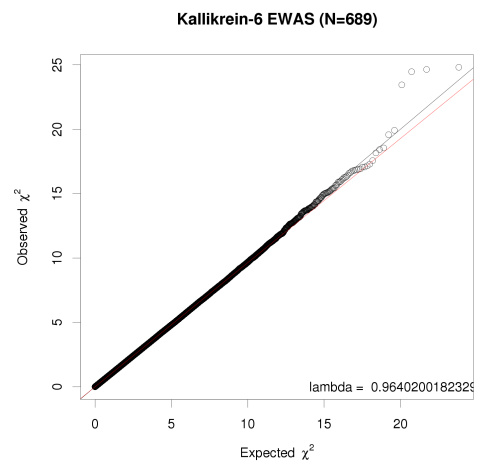

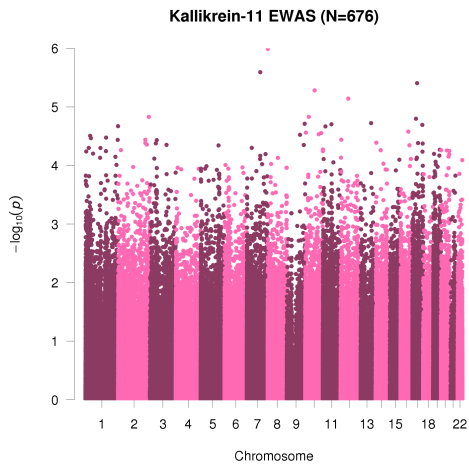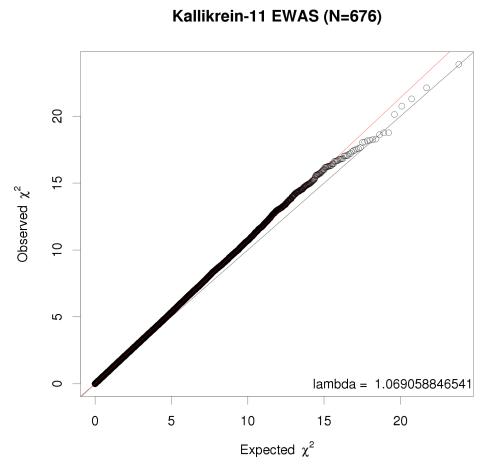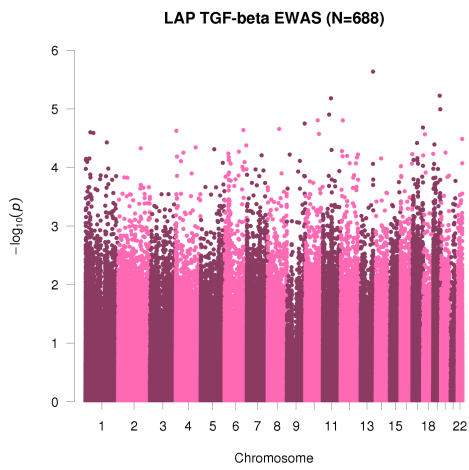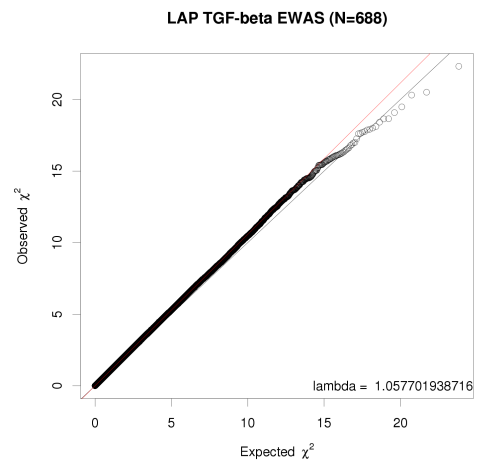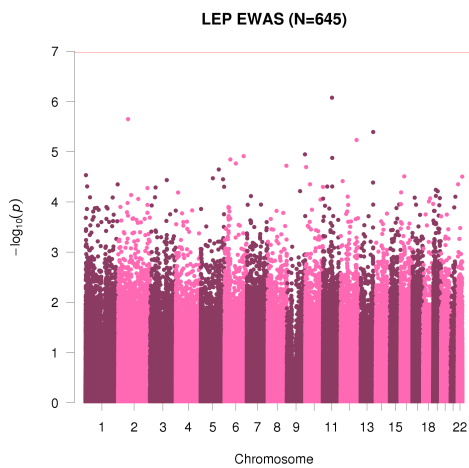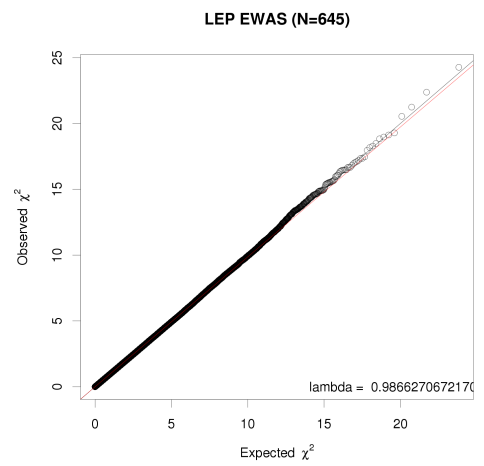



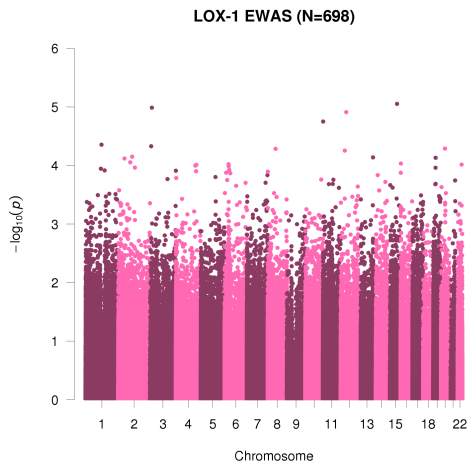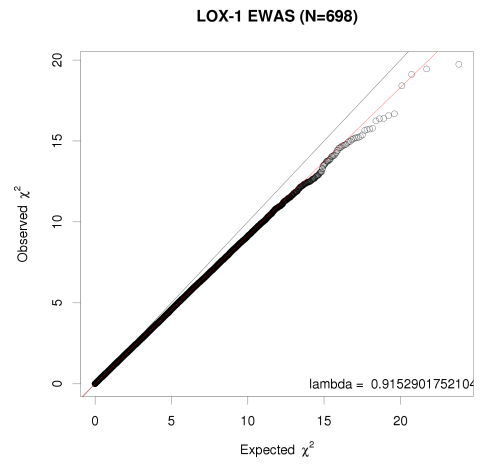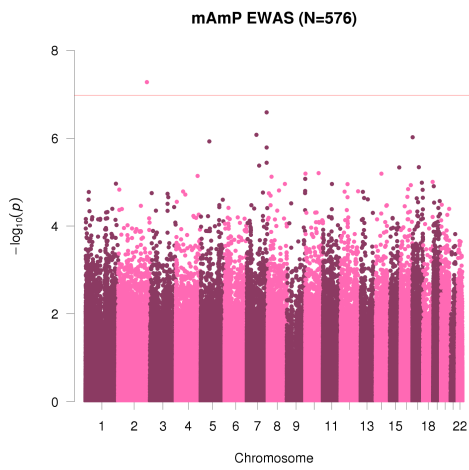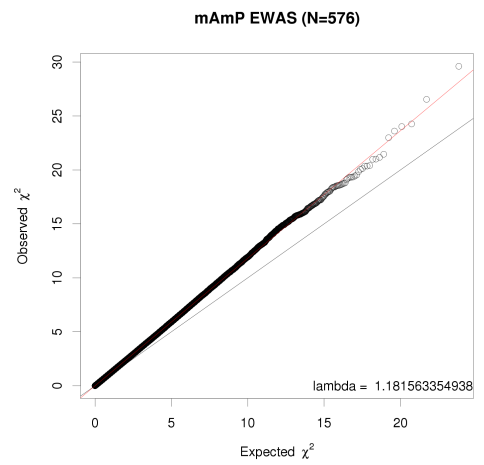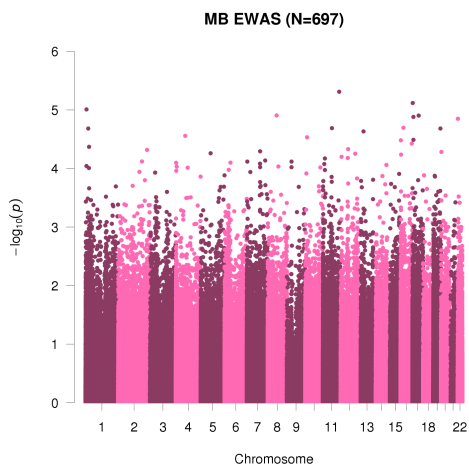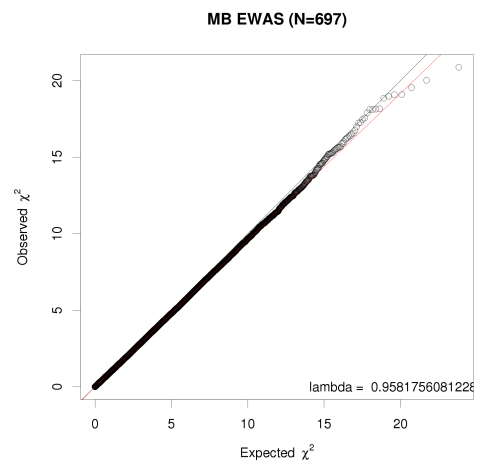

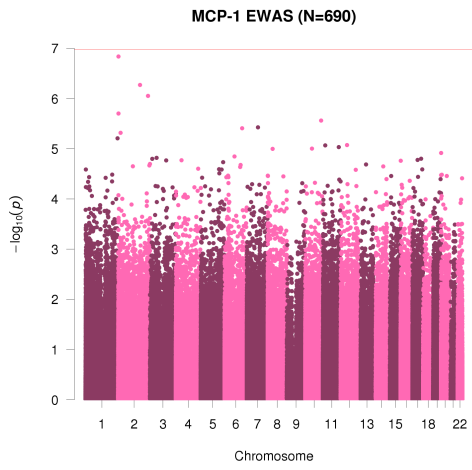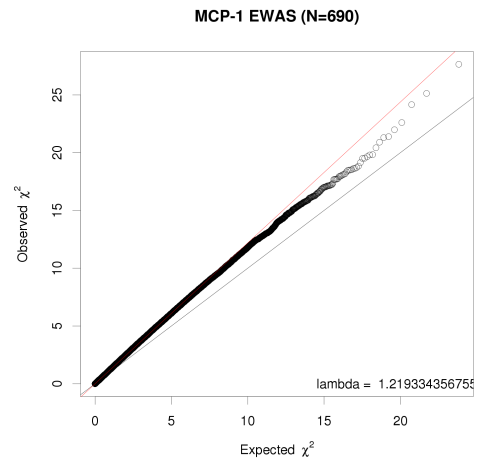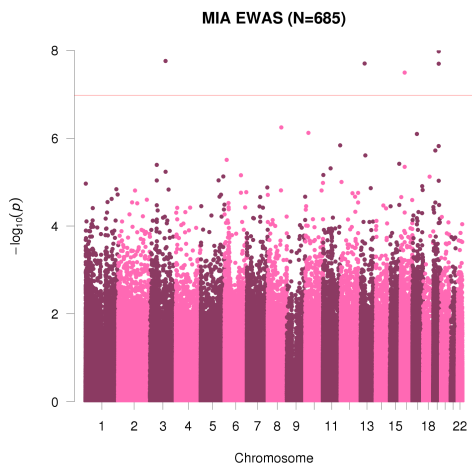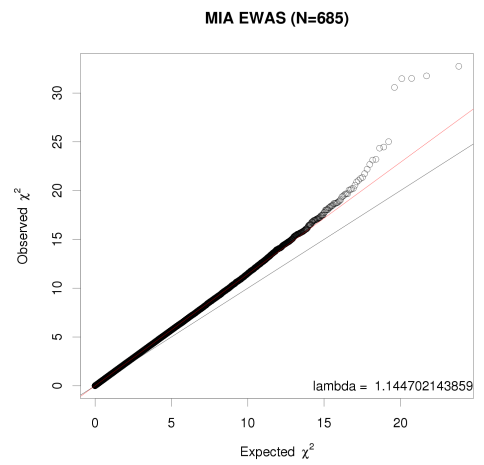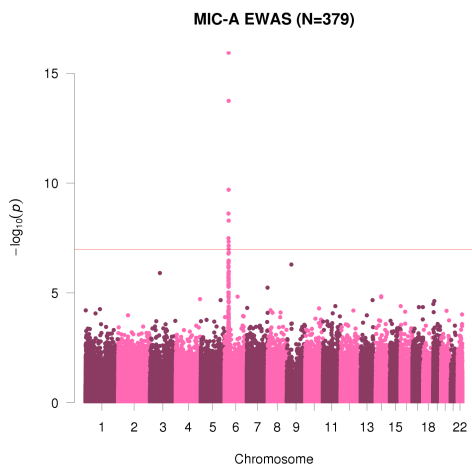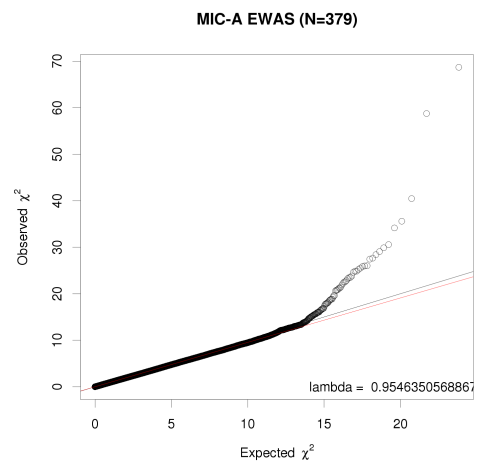

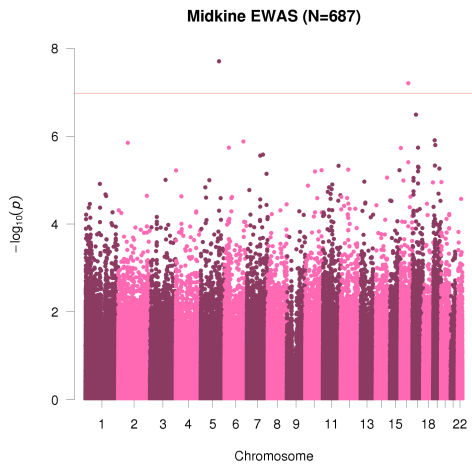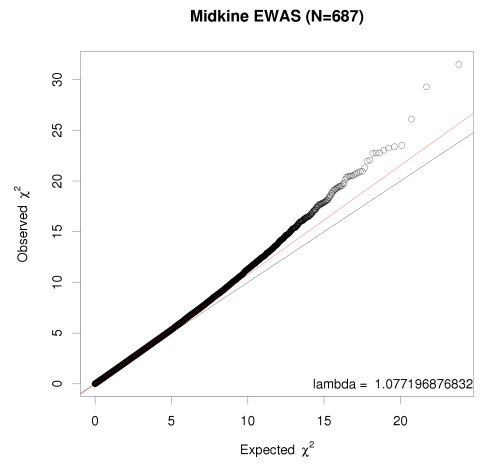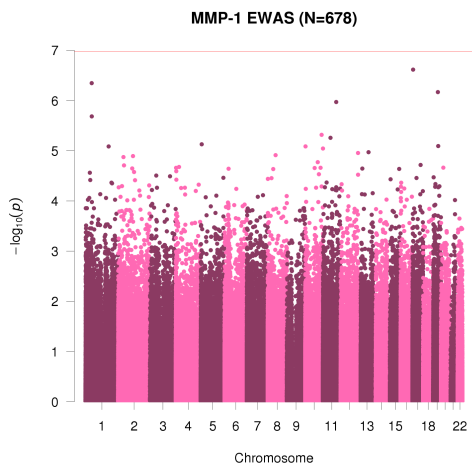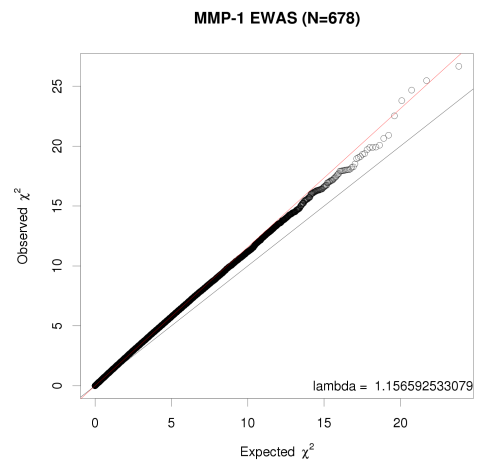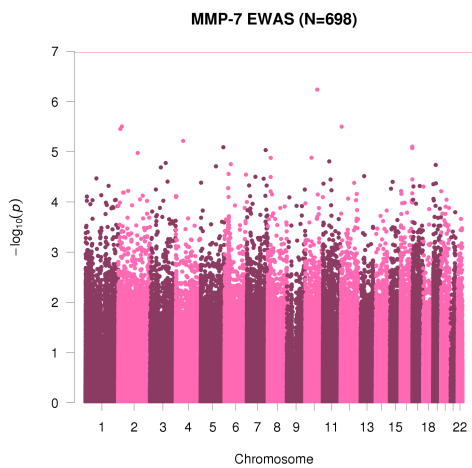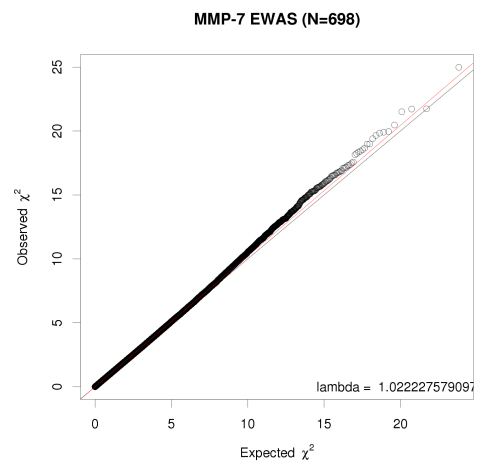

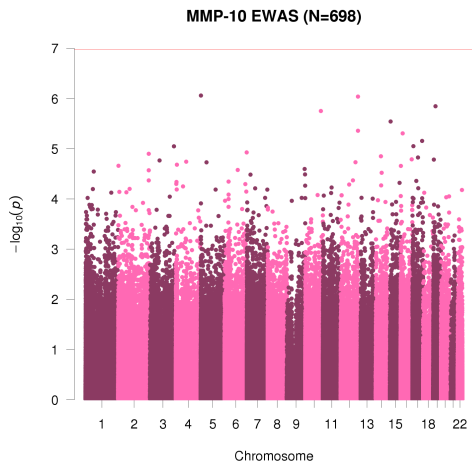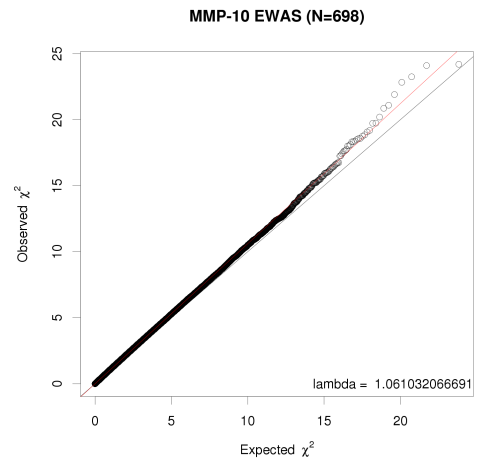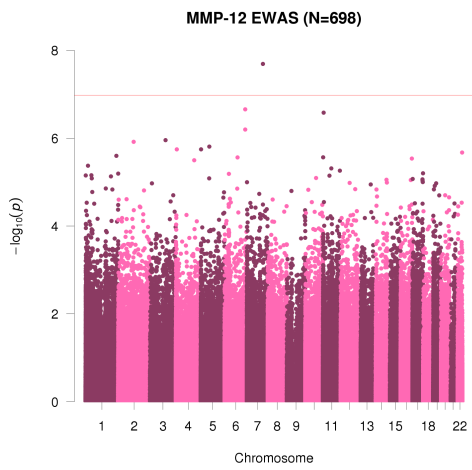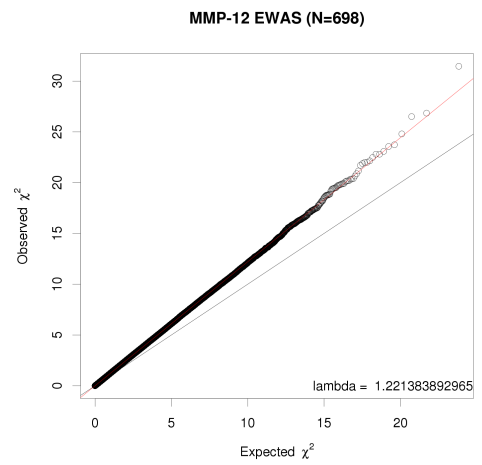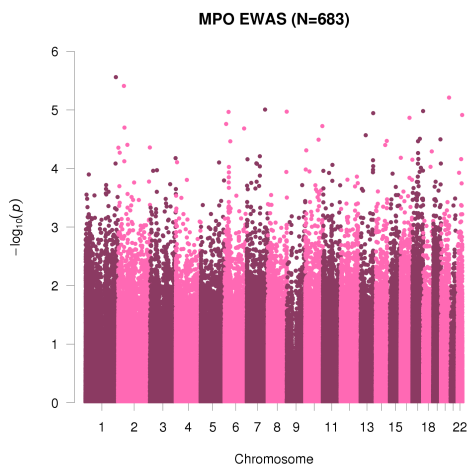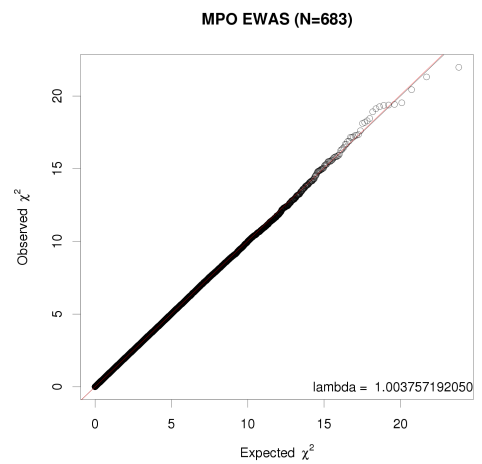

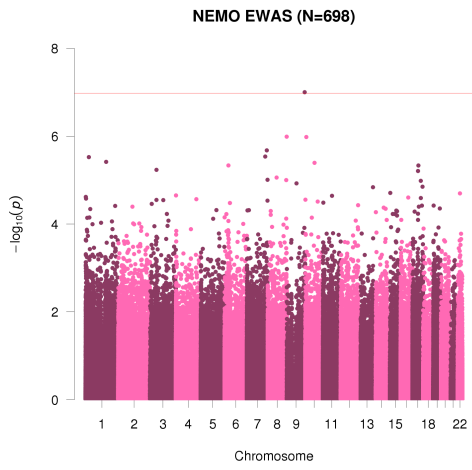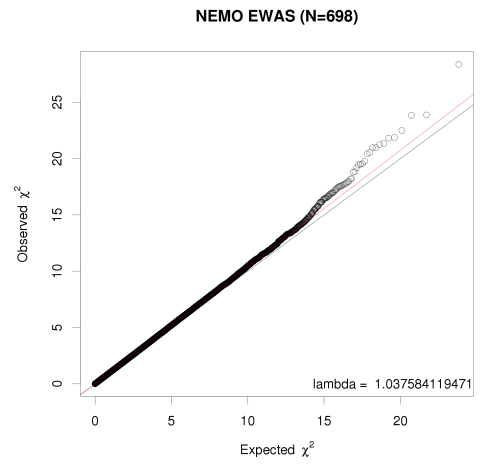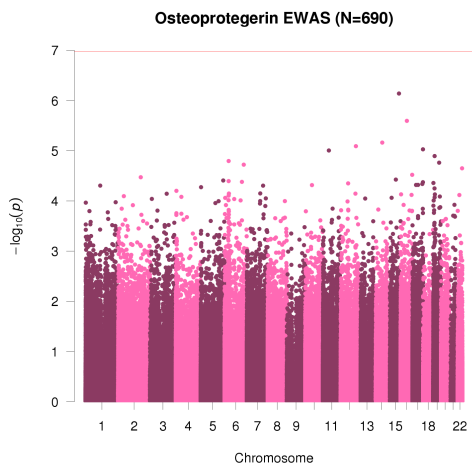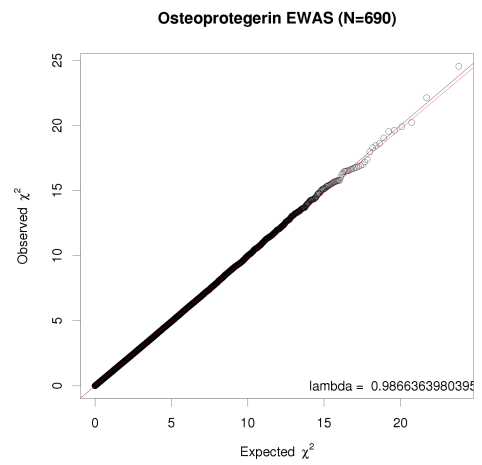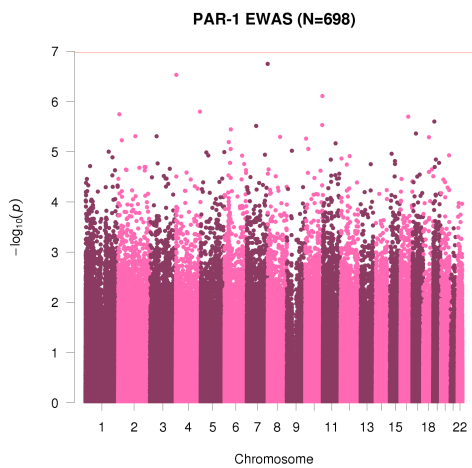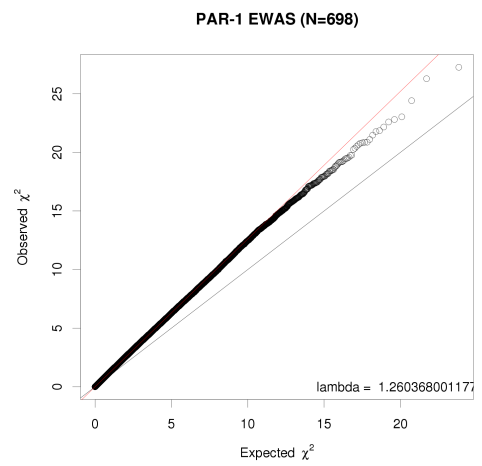

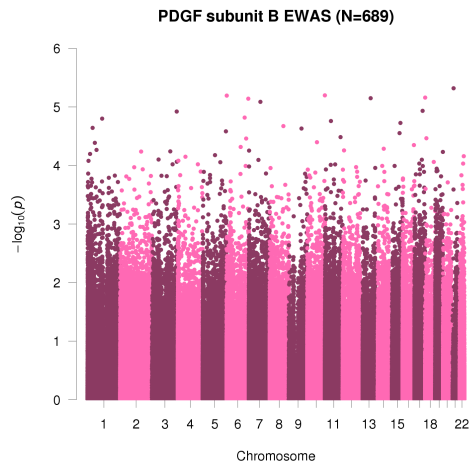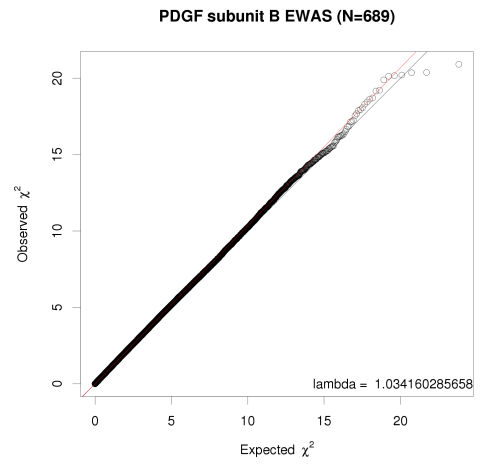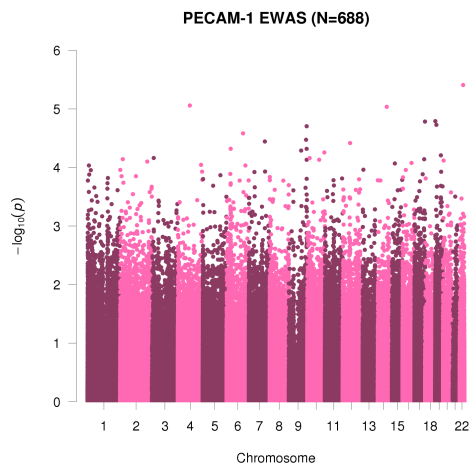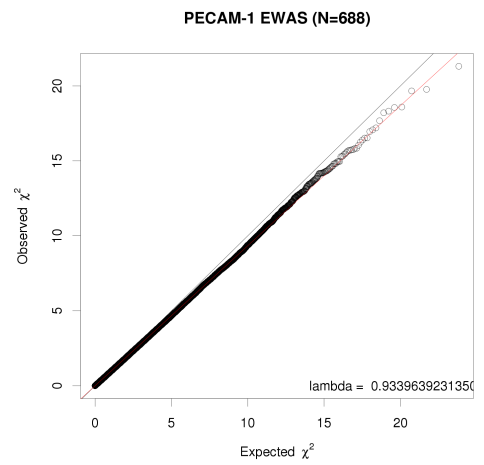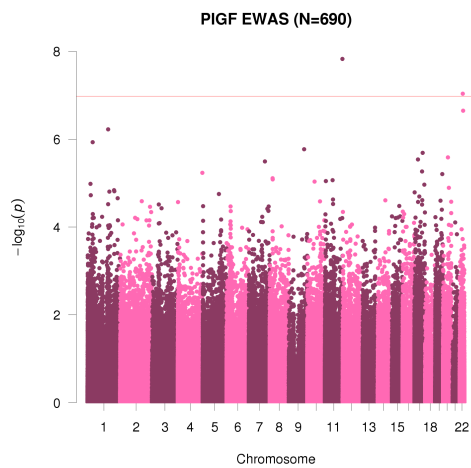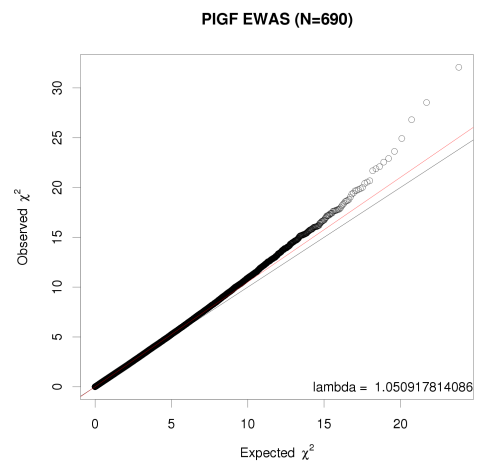

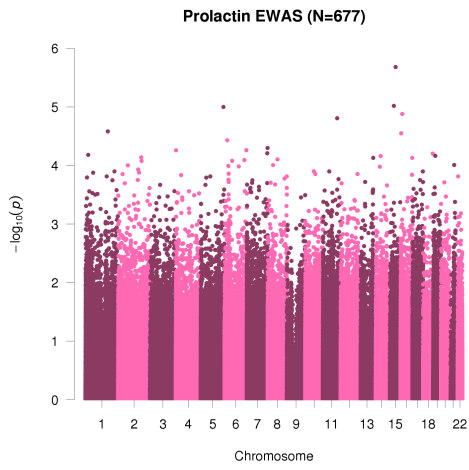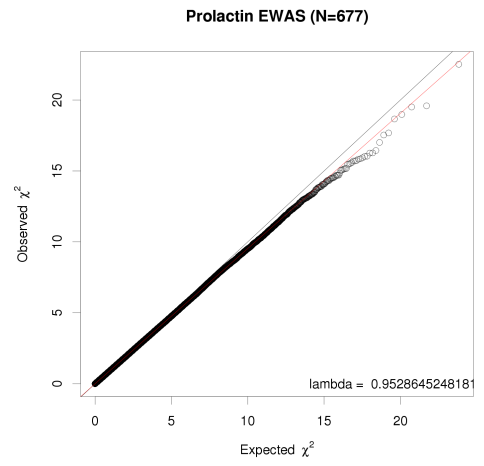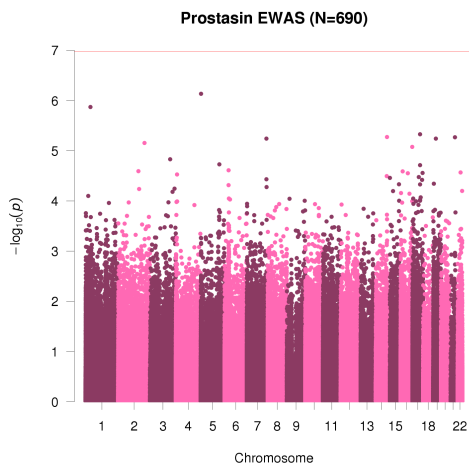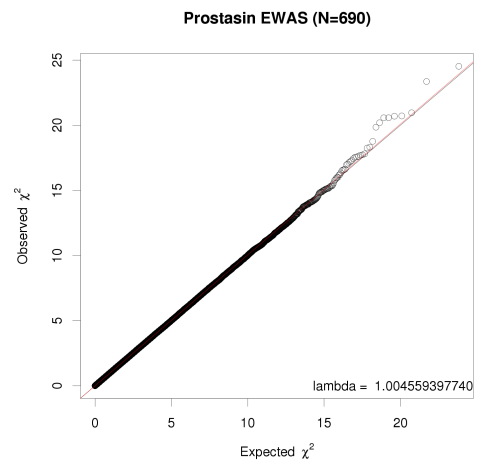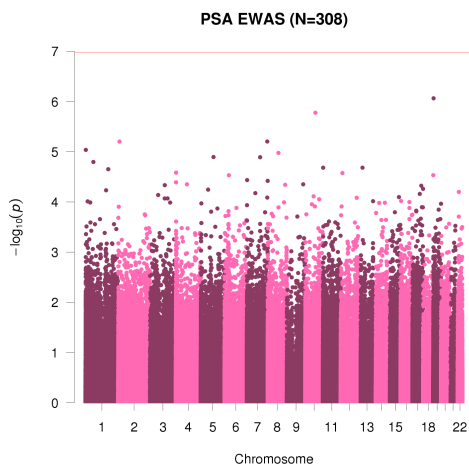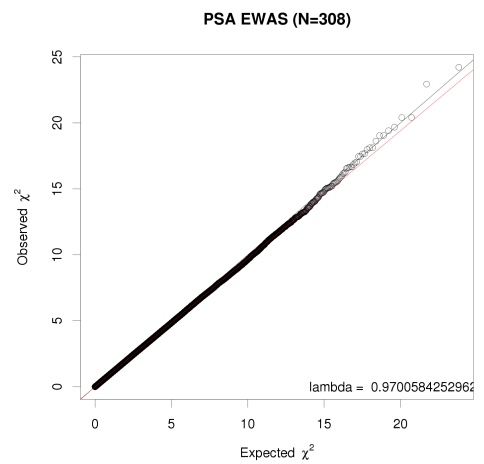

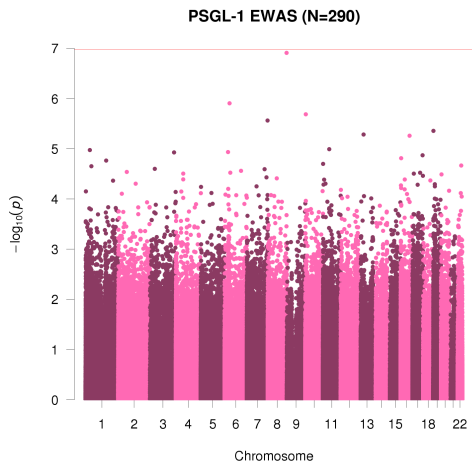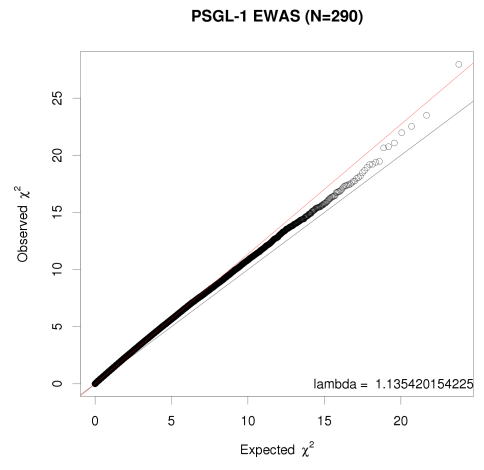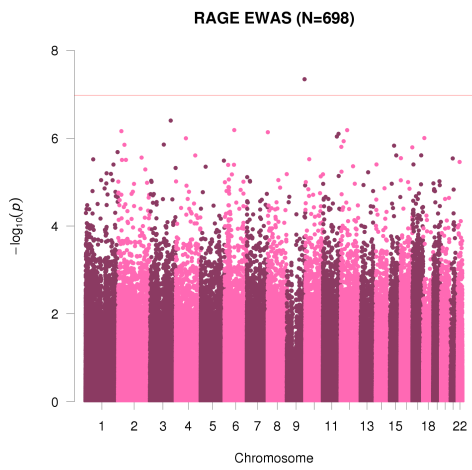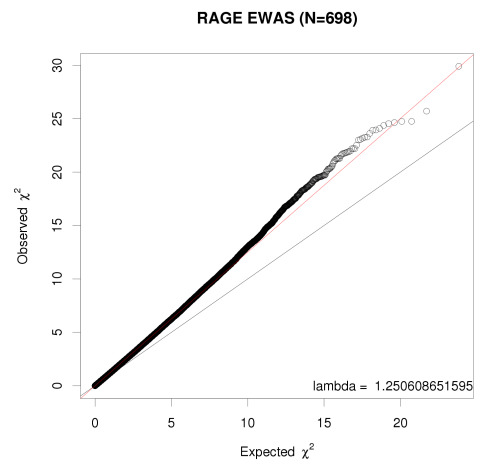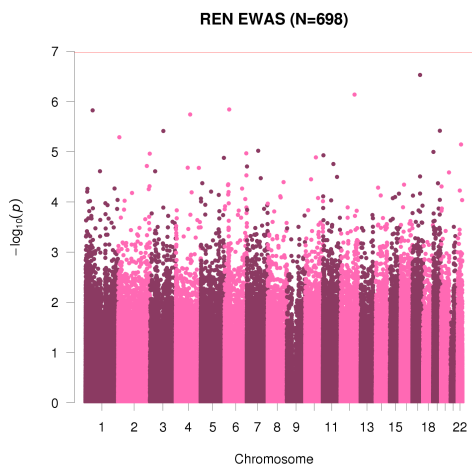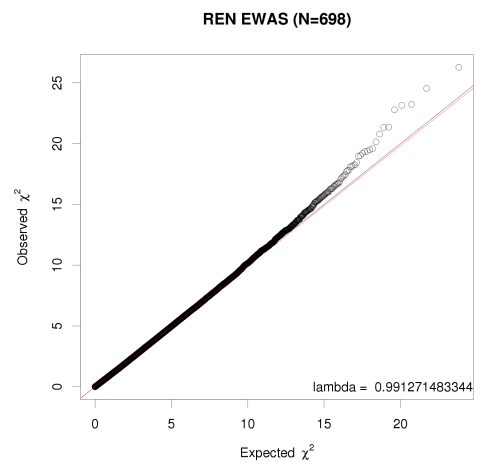



RETN EWAS (N=698)

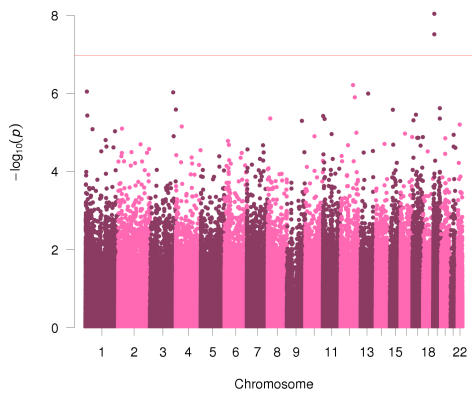

RETN EWAS (N=698)

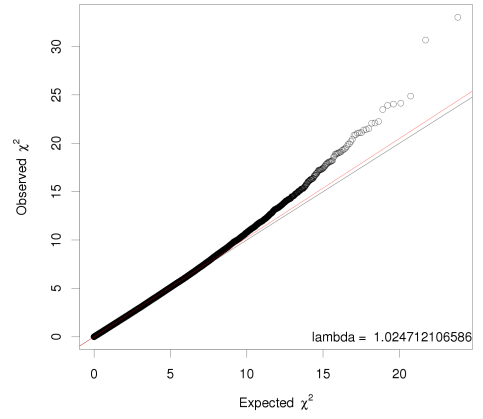

SIRT2 EWAS (N=549)

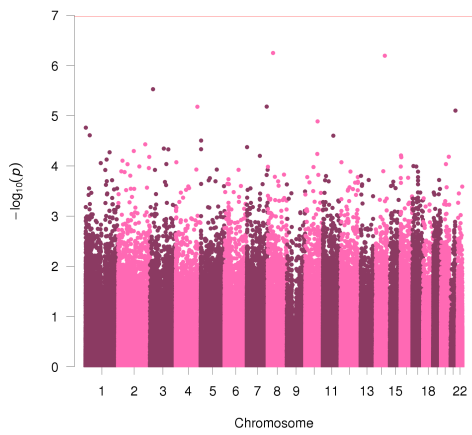

SIRT2 EWAS (N=549)

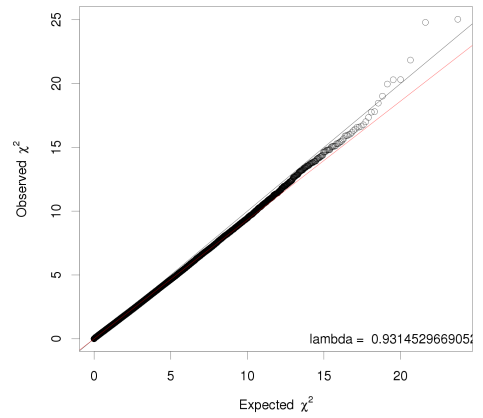

SPON1 EWAS (N=698)

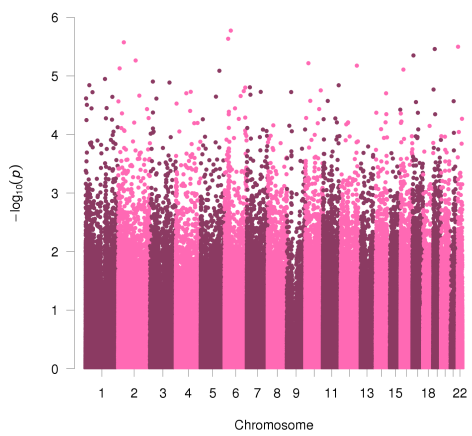

SPON1 EWAS (N=698)

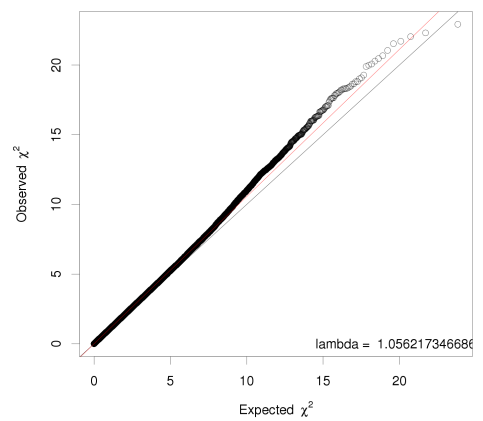

SRC EWAS (N=698)

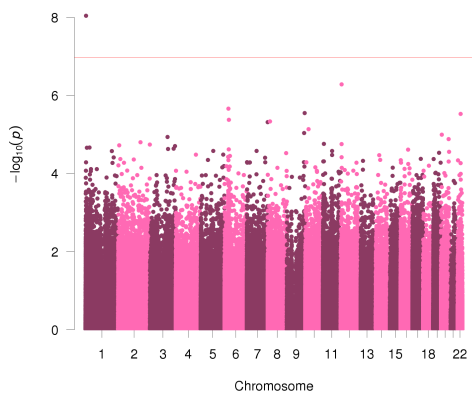

SRC EWAS (N=698)

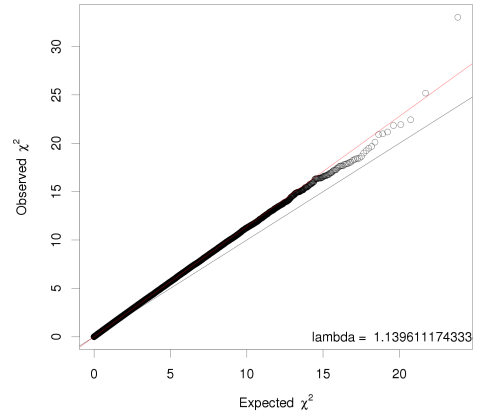

ST2 EWAS (N=698)

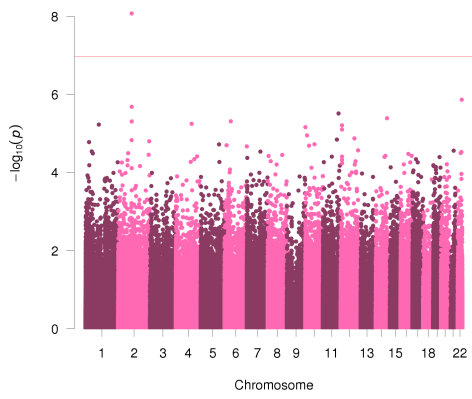

ST2 EWAS (N=698)

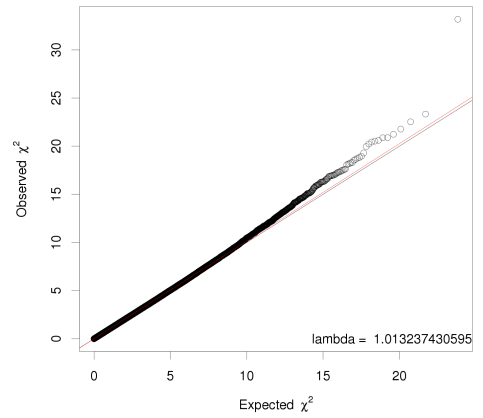

Stem Cell Factor EWAS (N=690)

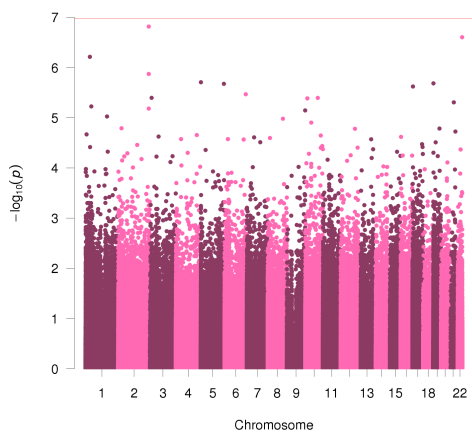

Stem Cell Factor EWAS (N=690)

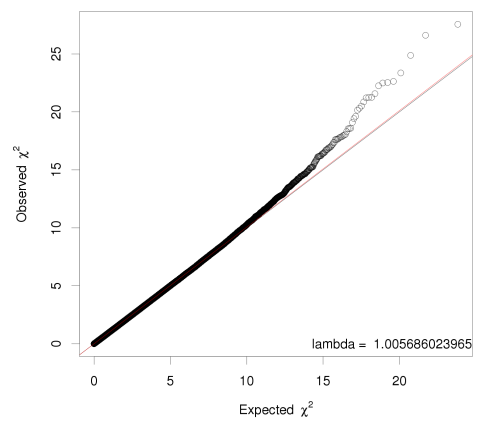

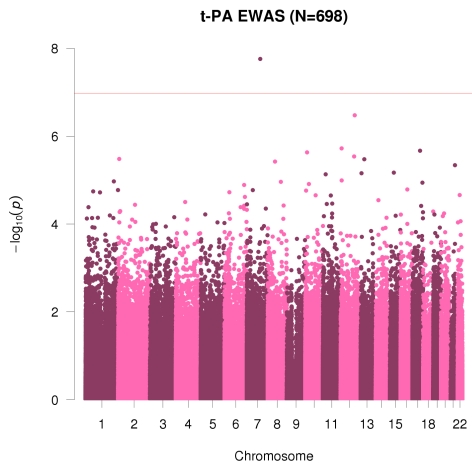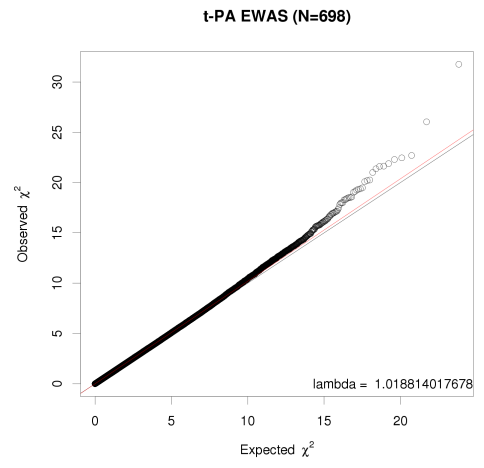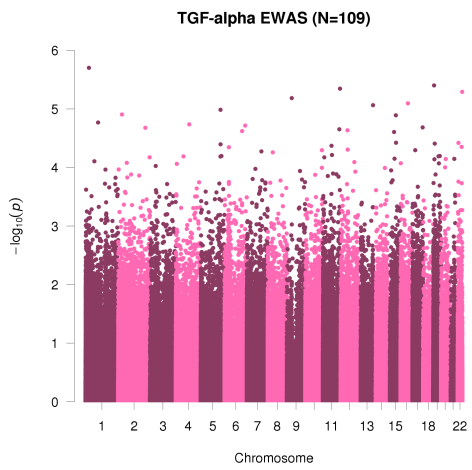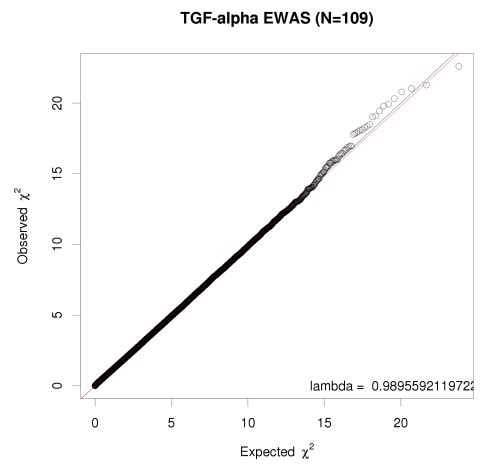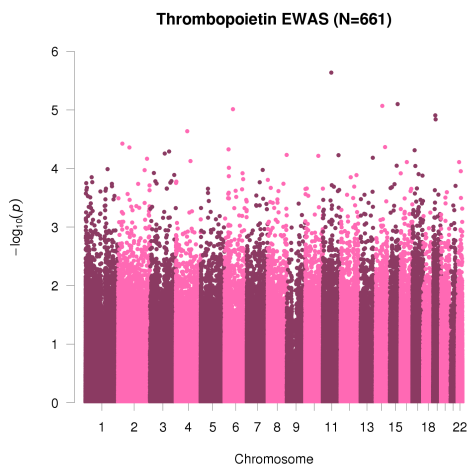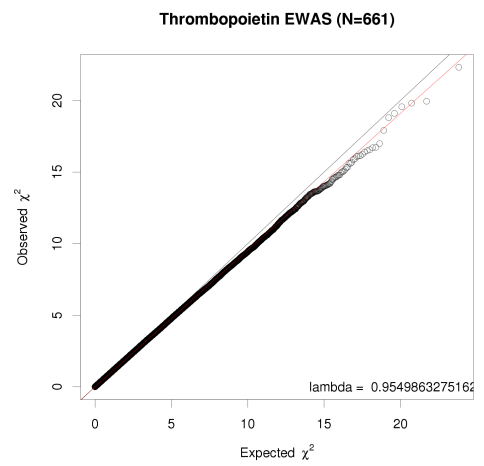

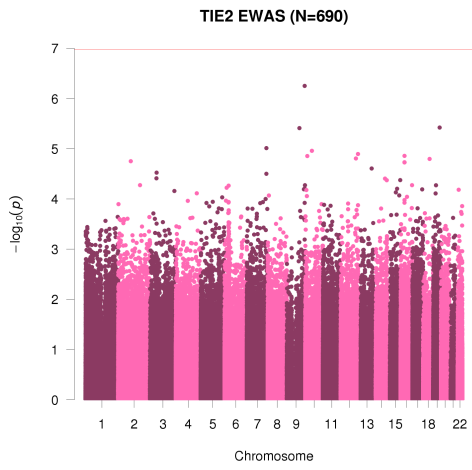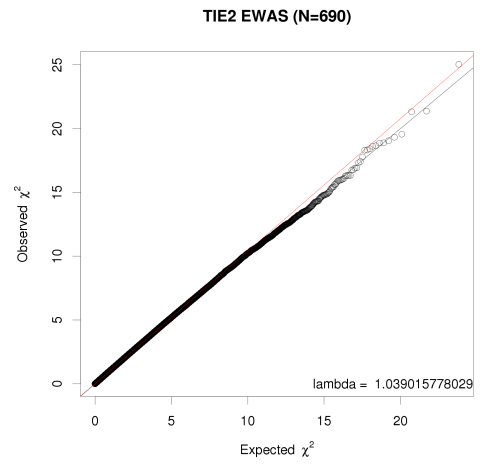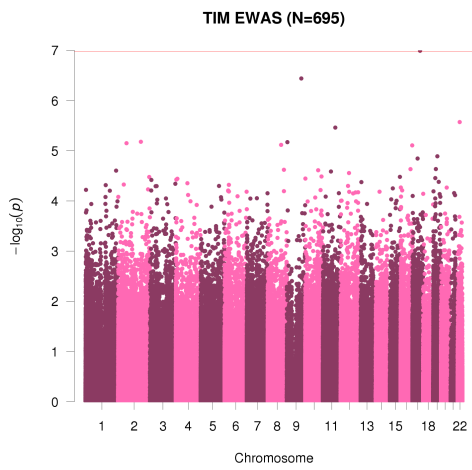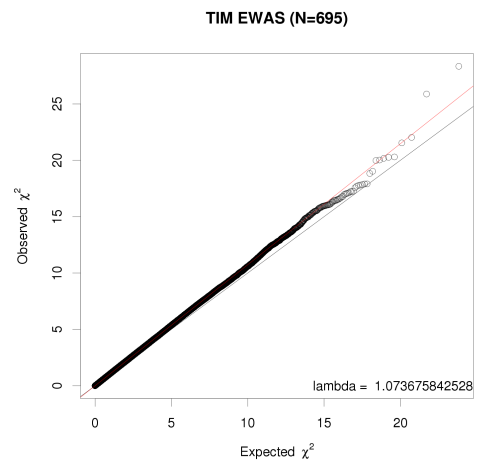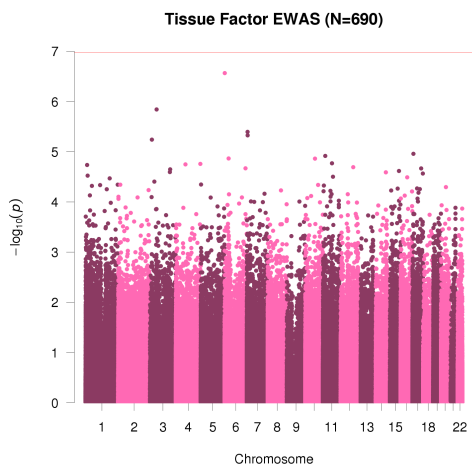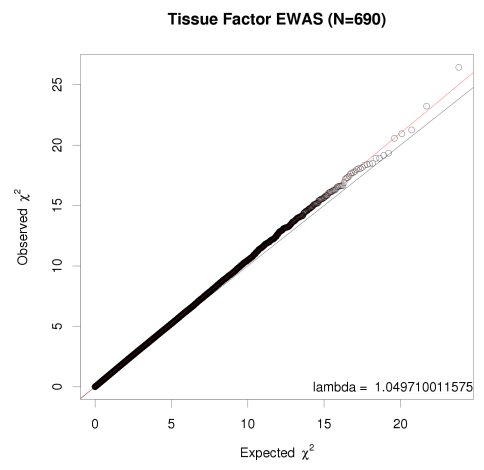

TM EWAS (N=698)

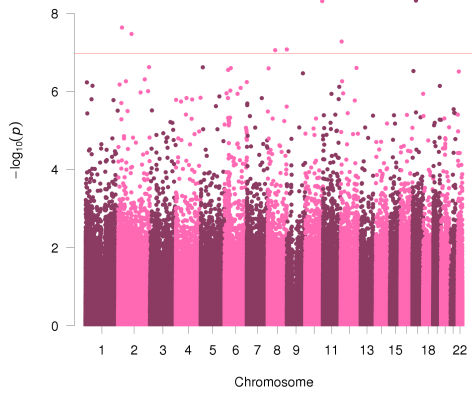

TM EWAS (N=698)

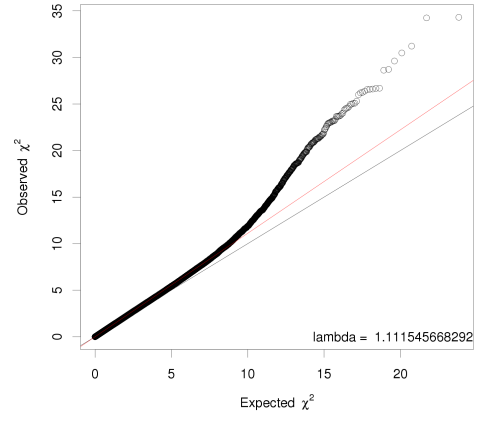

TNF EWAS (N=30)

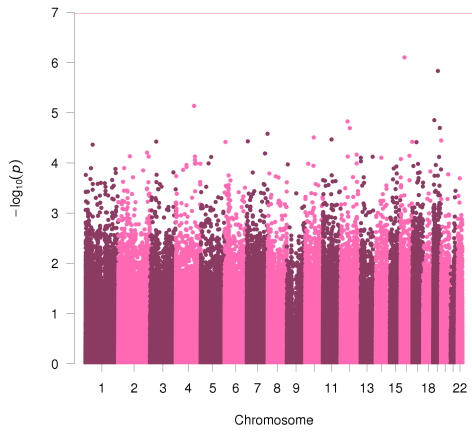

TNF EWAS (N=30)

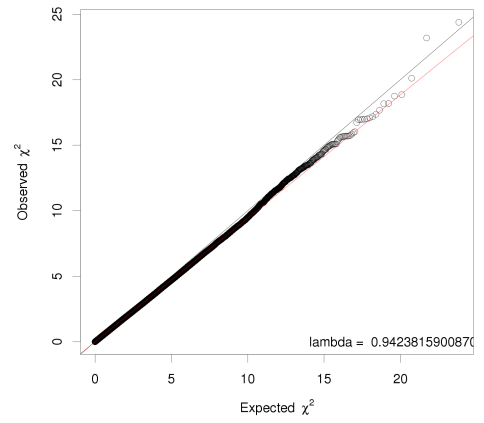

TNF-R2 EWAS (N=672)

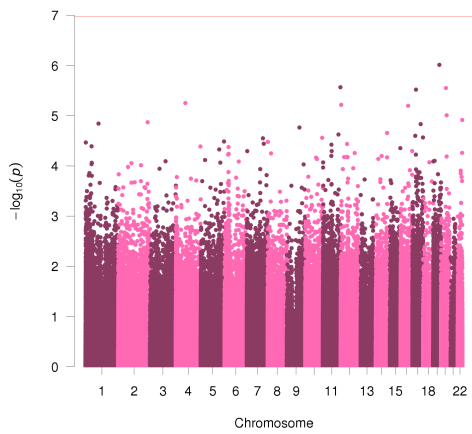

TNF-R2 EWAS (N=672)

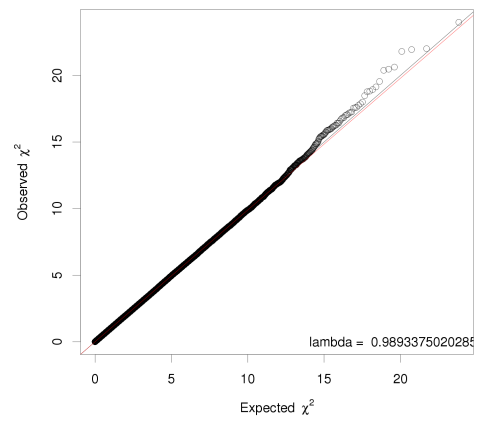

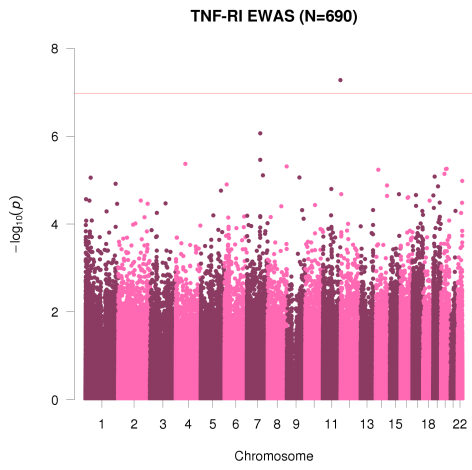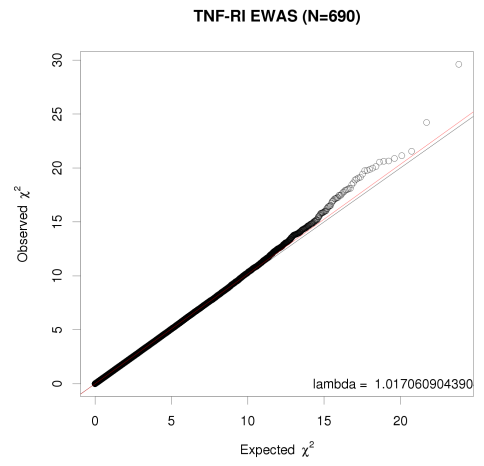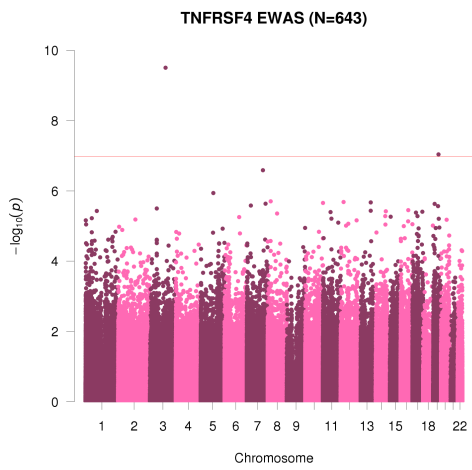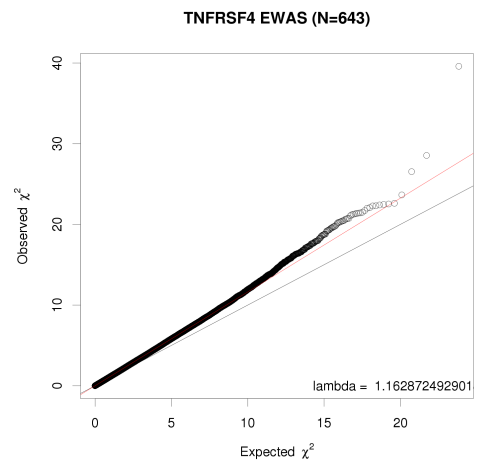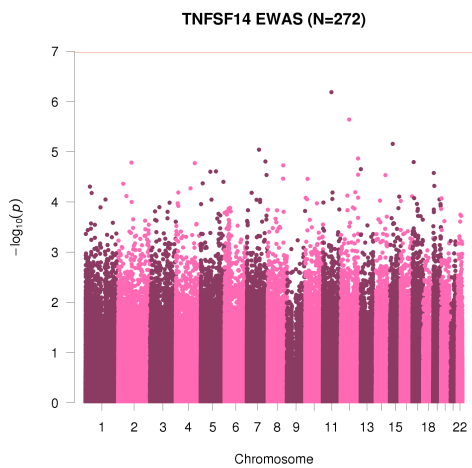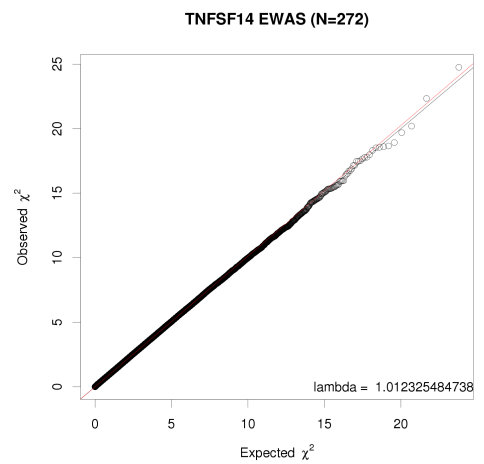

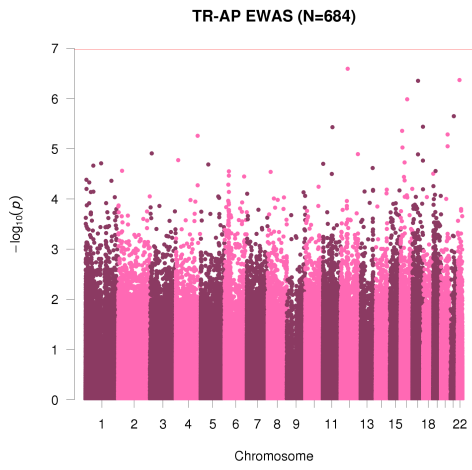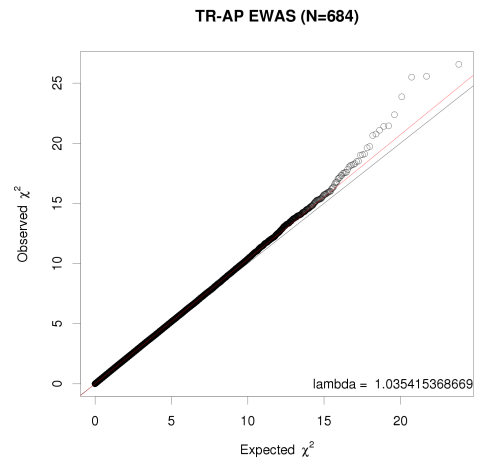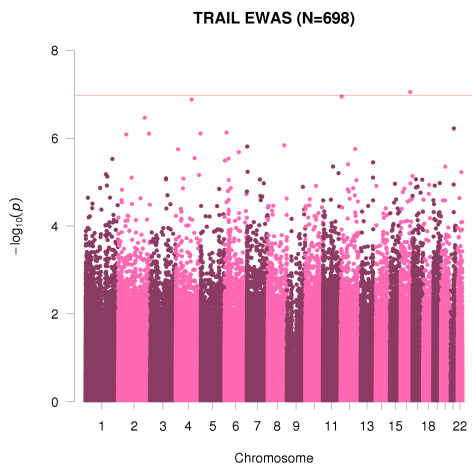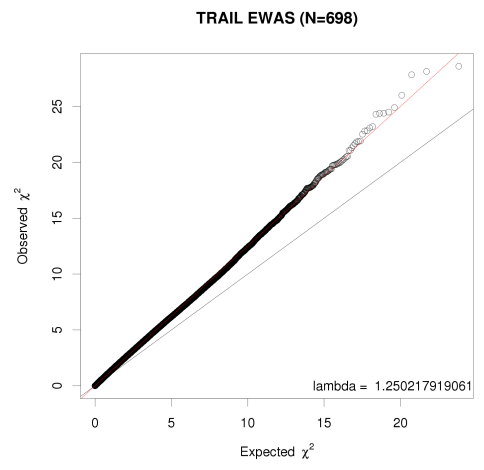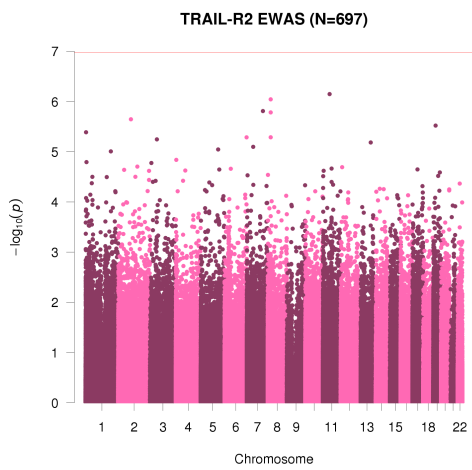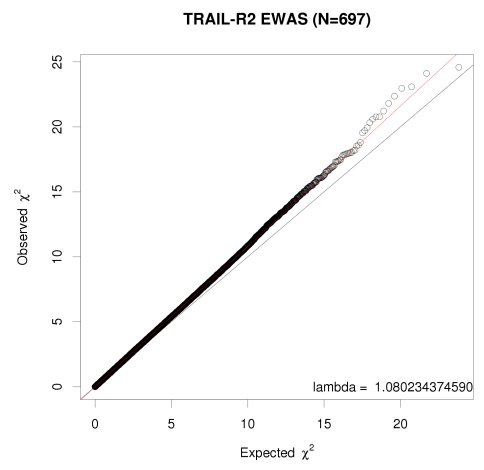

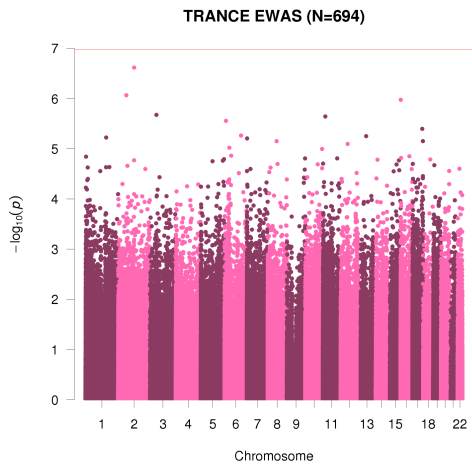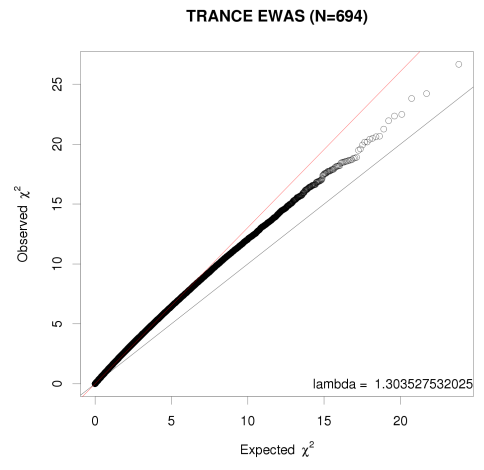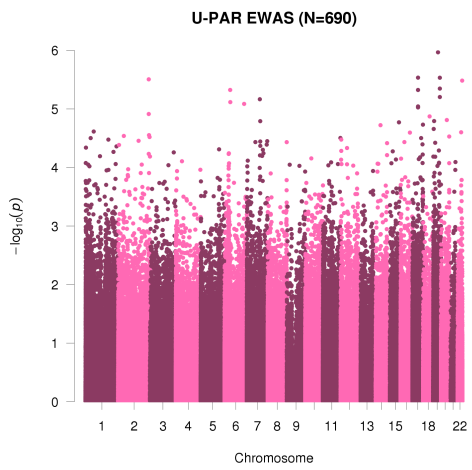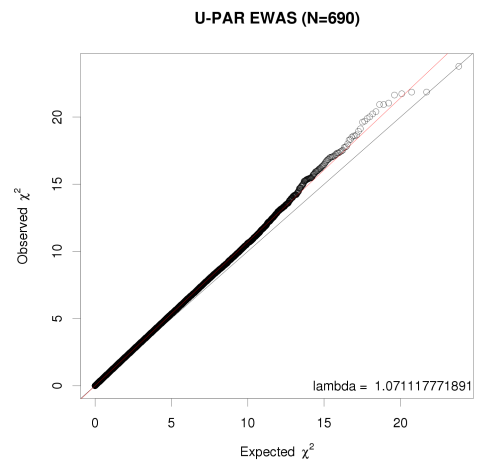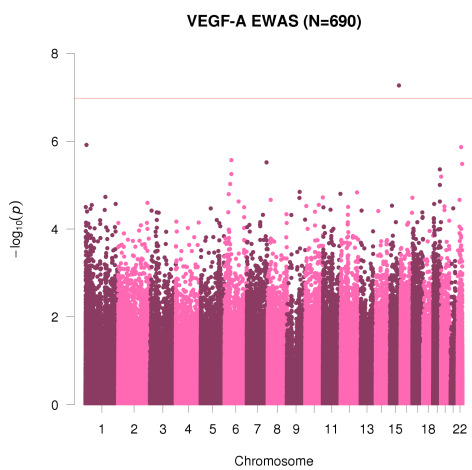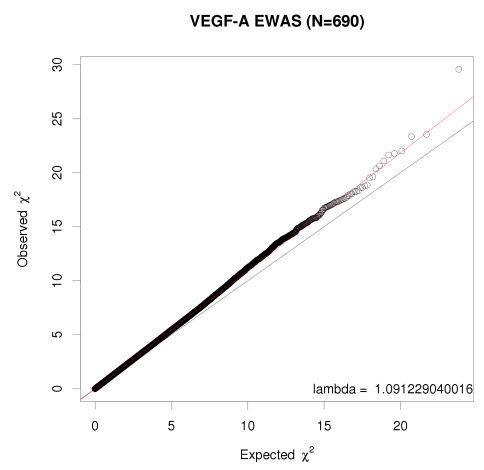



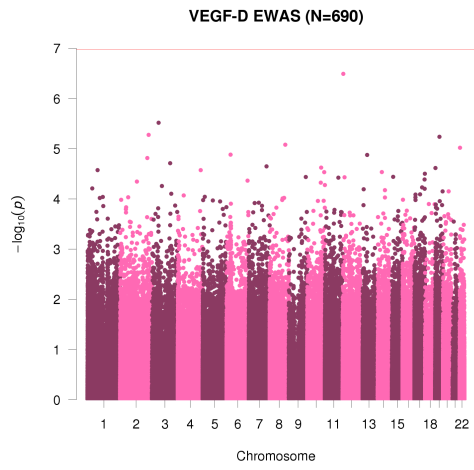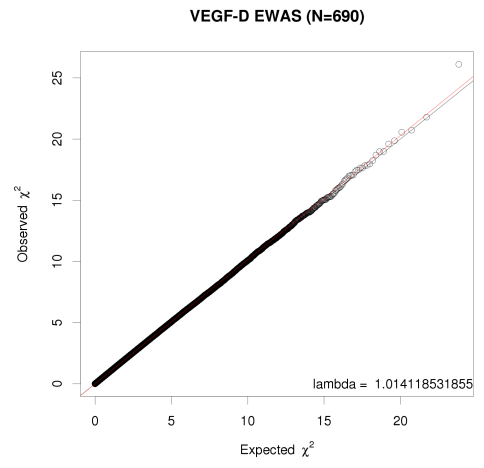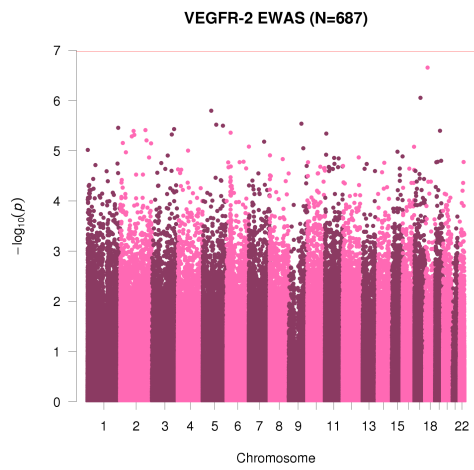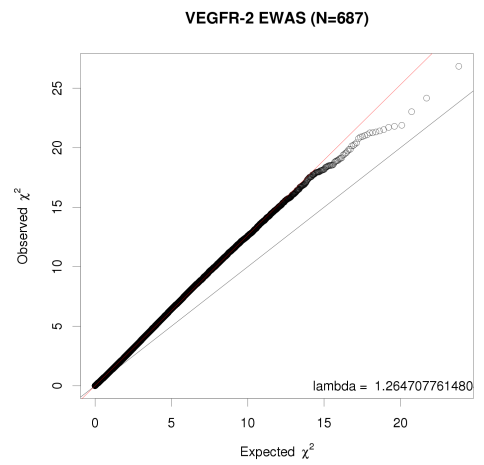

Supplement: pgen.1007005.s003.pdf [file pgen.1007005.s003.pdf]
