# Supplementary material for: The relative contribution of DNA methylation and genetic variants on protein biomarkers for human diseases
Source: PubMed Central journal article supplement (PMC5617224; doi:10.1371/journal.pgen.1007005), 2017-09-15

**Supplemental Fig S7. EWAS for genetic scores (GS).**  
GS are calculated for biomarkers with cis-regulatory SNPs only.

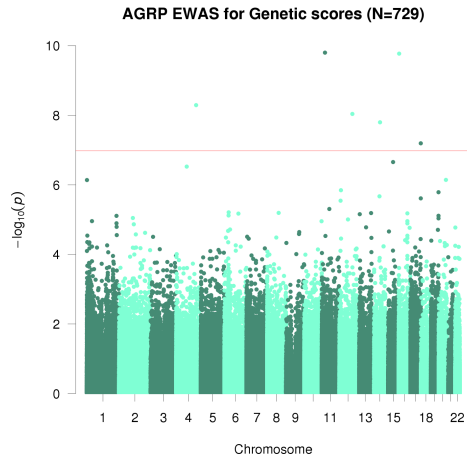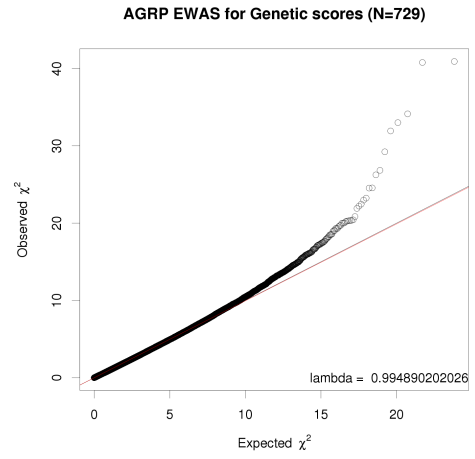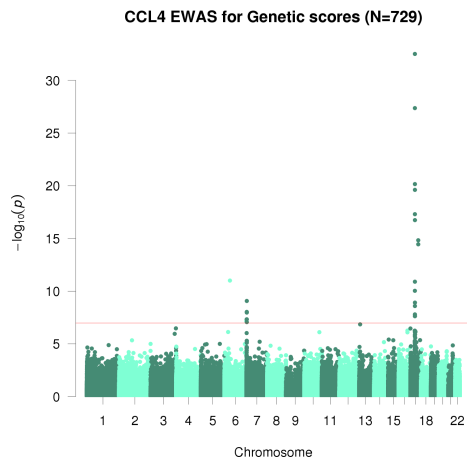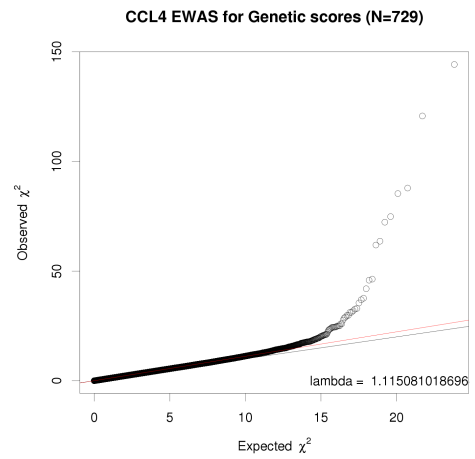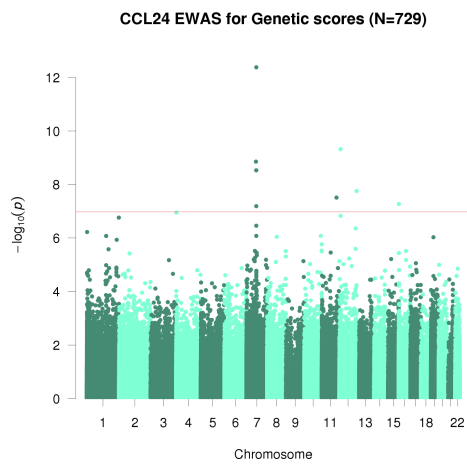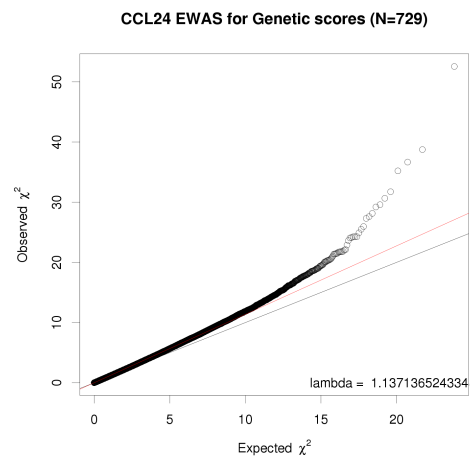

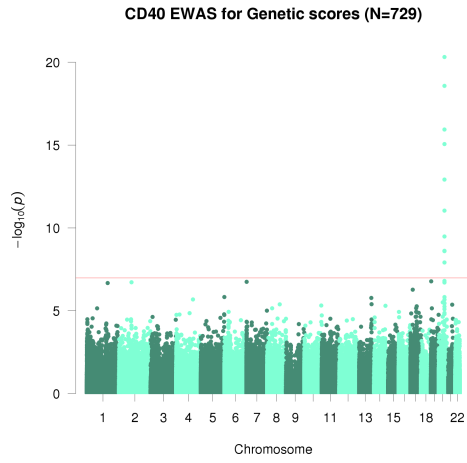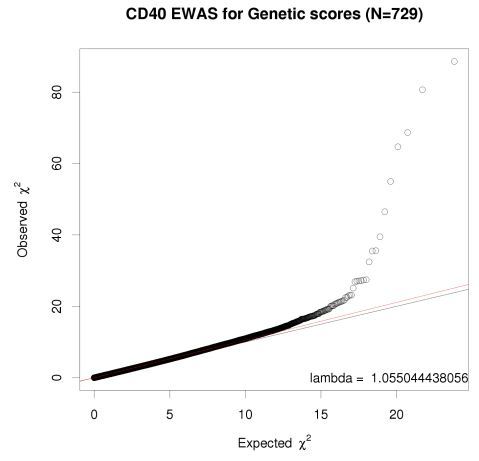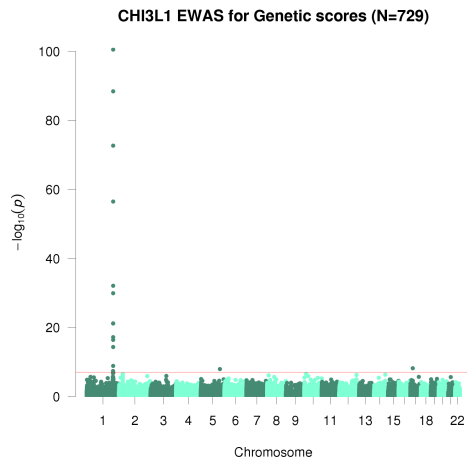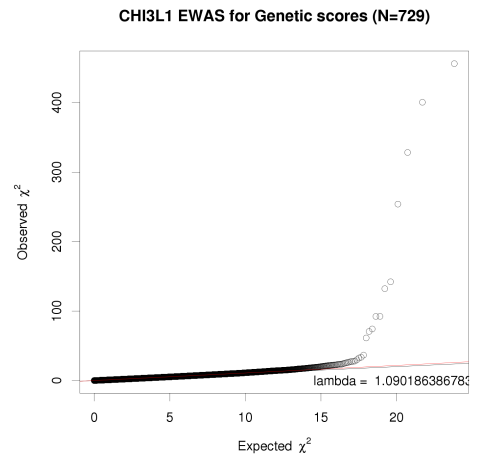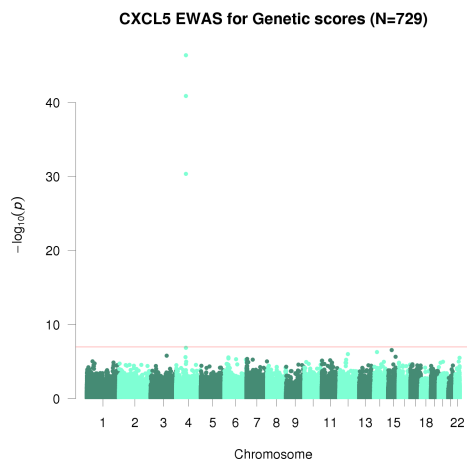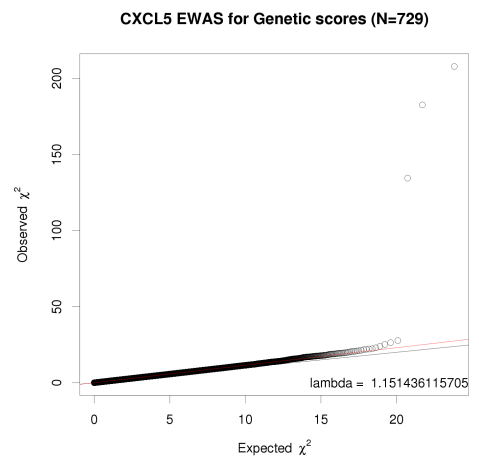

CXCL6 EWAS for Genetic scores (N=729)

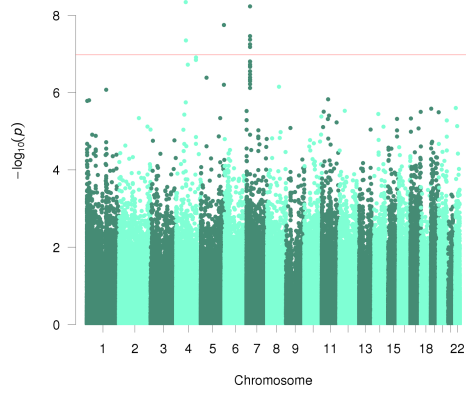

CXCL6 EWAS for Genetic scores (N=729)

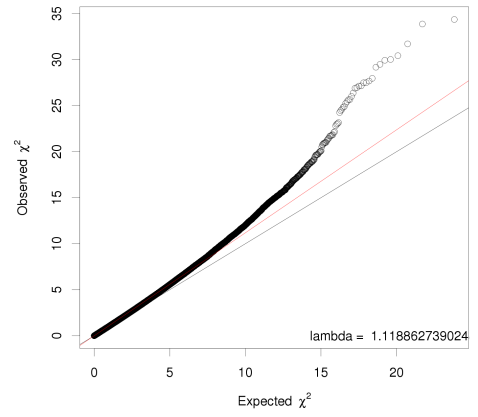

CXCL10 EWAS for Genetic scores (N=729)

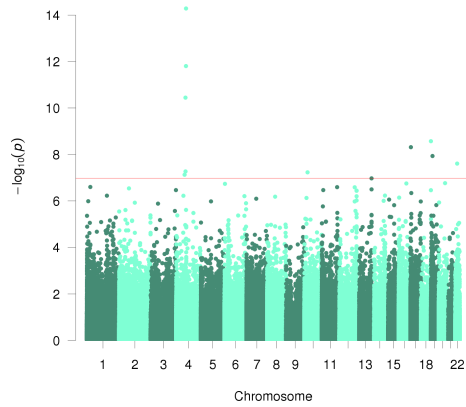

CXCL10 EWAS for Genetic scores (N=729)

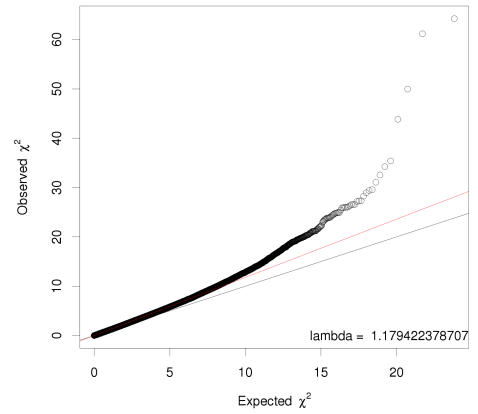

Cystatin B EWAS for Genetic scores (N=729)

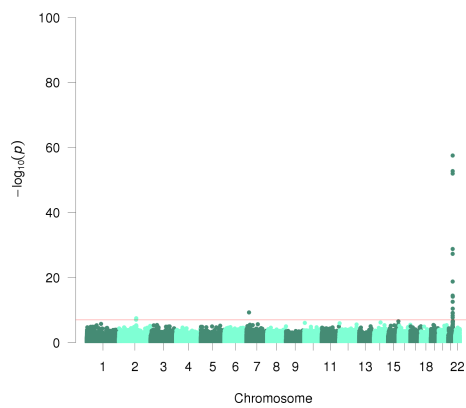

Cystatin B EWAS for Genetic scores (N=729)

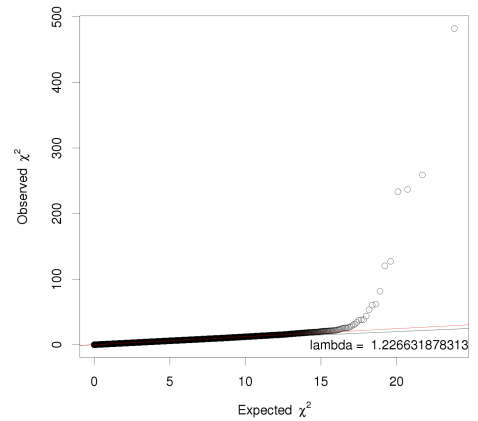

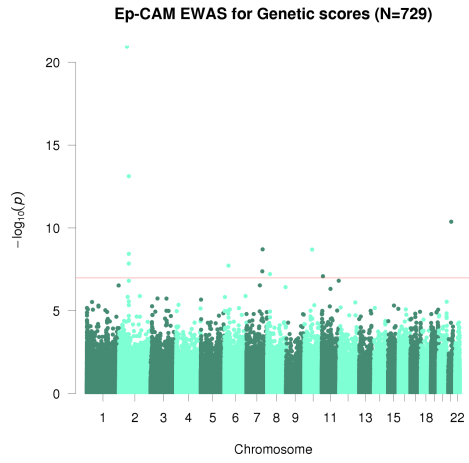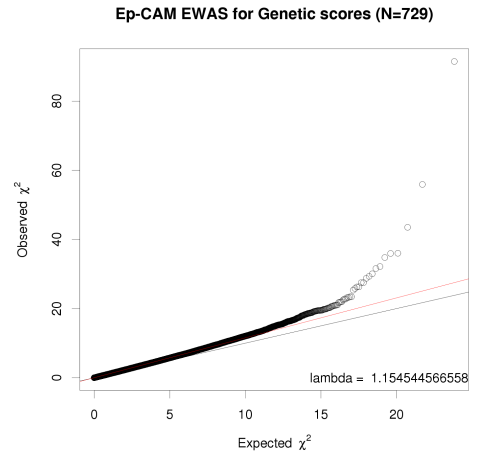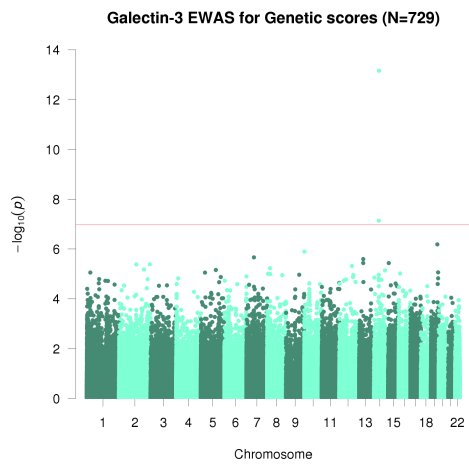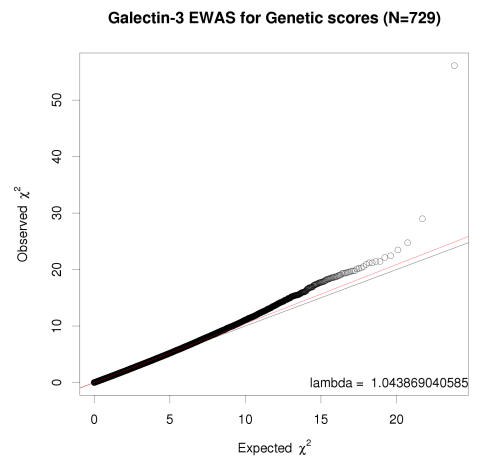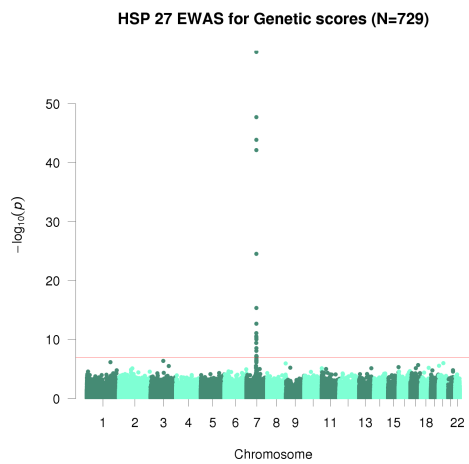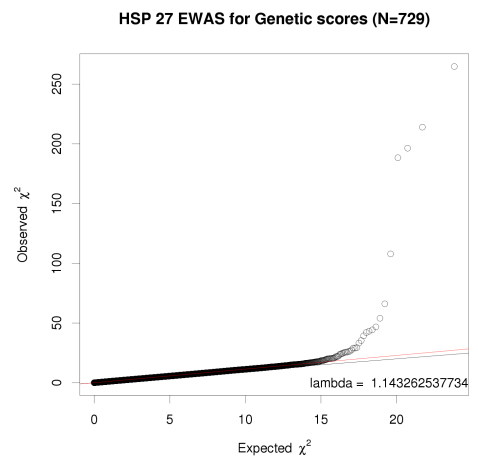

IL-12 EWAS for Genetic scores (N=729)

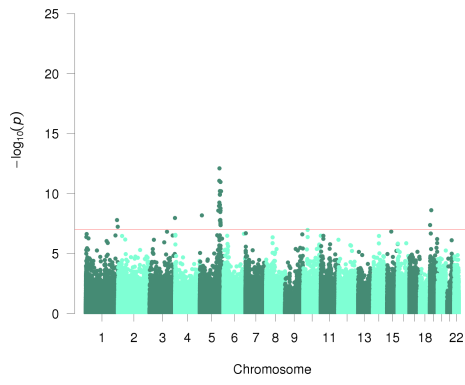

IL-12 EWAS for Genetic scores (N=729)

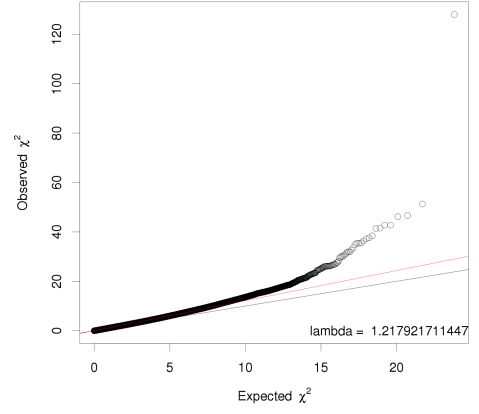

IL2RA EWAS for Genetic scores (N=729)

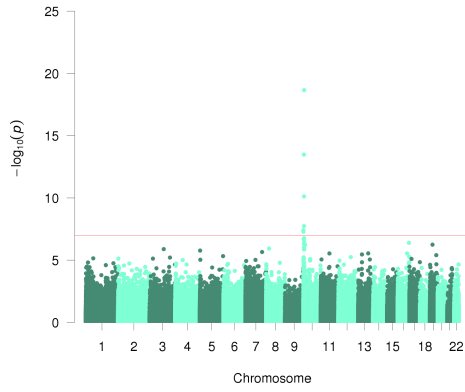

IL2RA EWAS for Genetic scores (N=729)

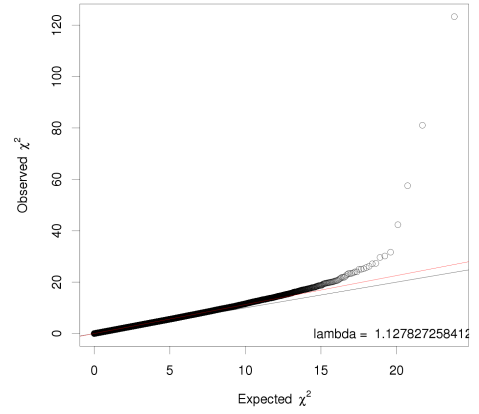

IL6RA EWAS for Genetic scores (N=729)

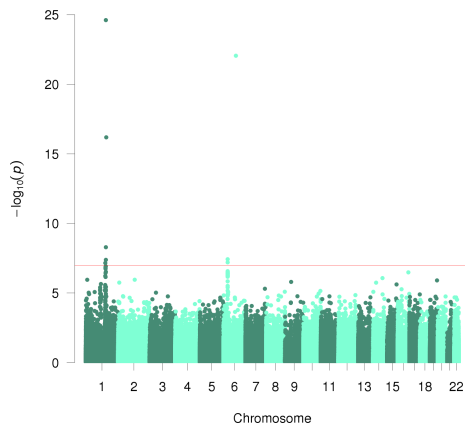

IL6RA EWAS for Genetic scores (N=729)

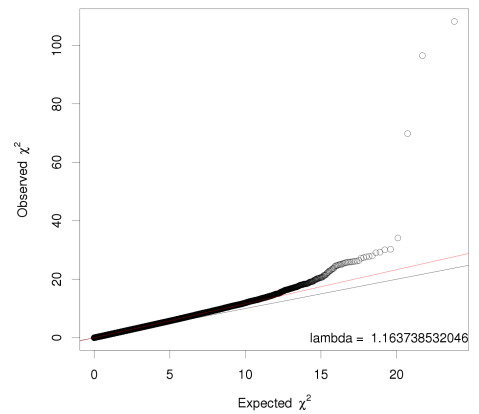

IL17RB EWAS for Genetic scores (N=729)

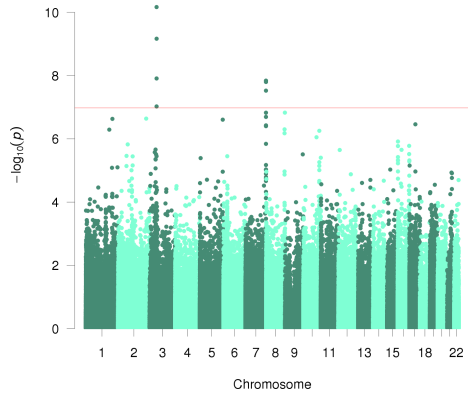

IL17RB EWAS for Genetic scores (N=729)

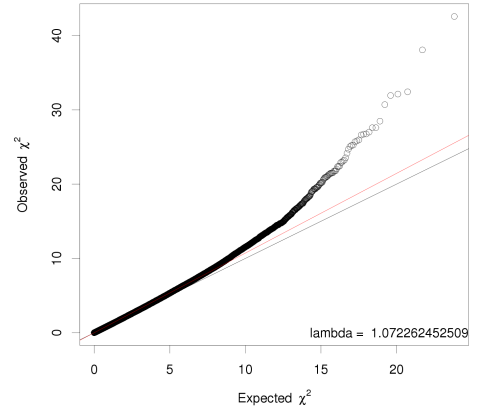

Kallikrein-11 EWAS for Genetic scores (N=729)

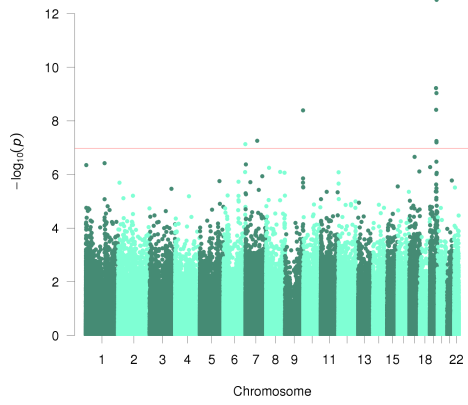

Kallikrein-11 EWAS for Genetic scores (N=729)

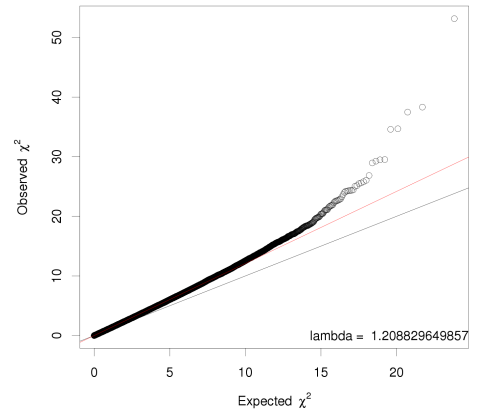

MIA EWAS for Genetic scores (N=729)

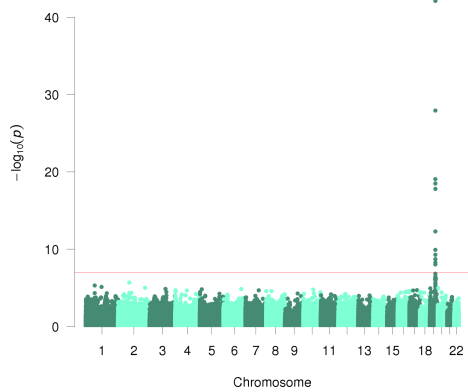

MIA EWAS for Genetic scores (N=729)

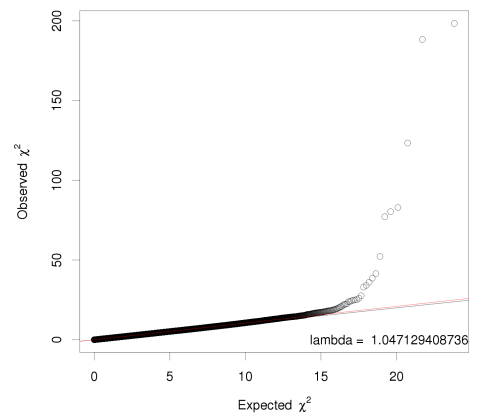

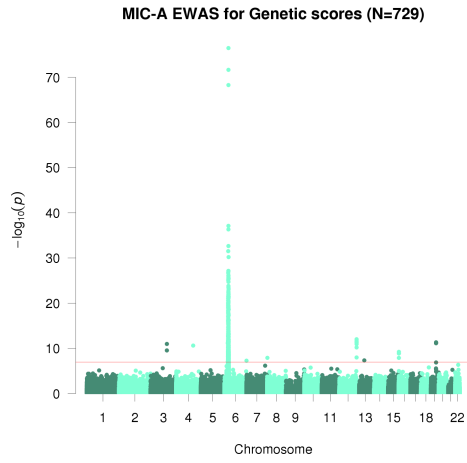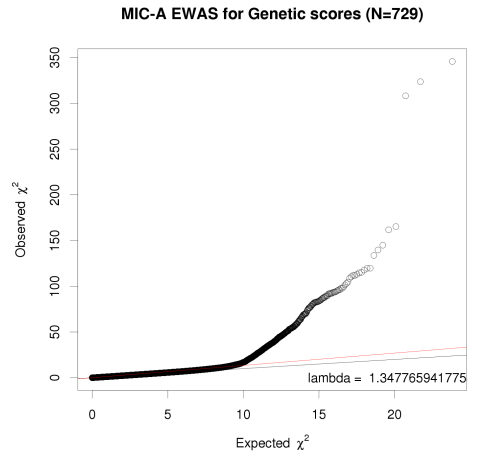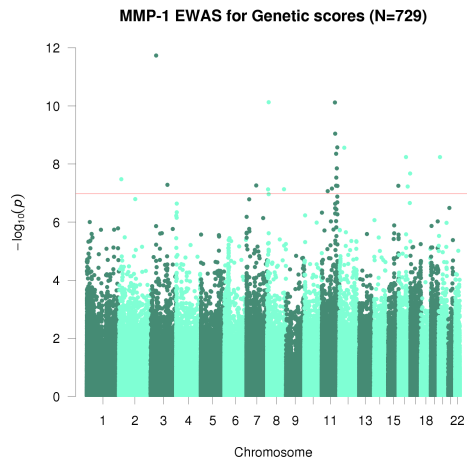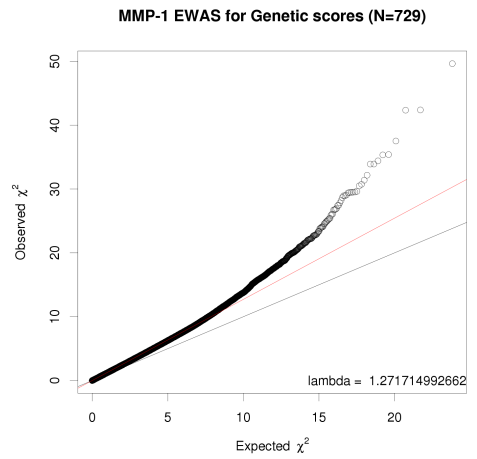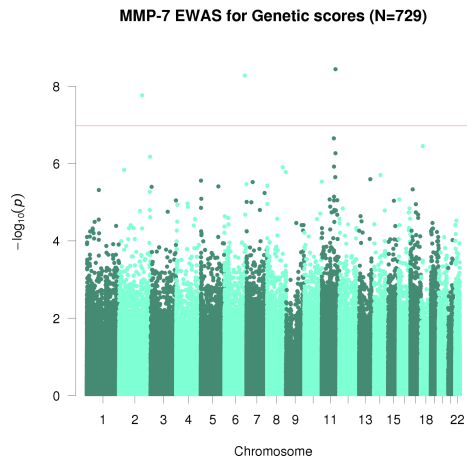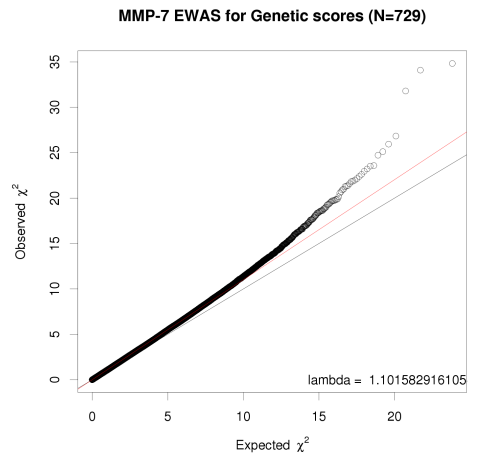

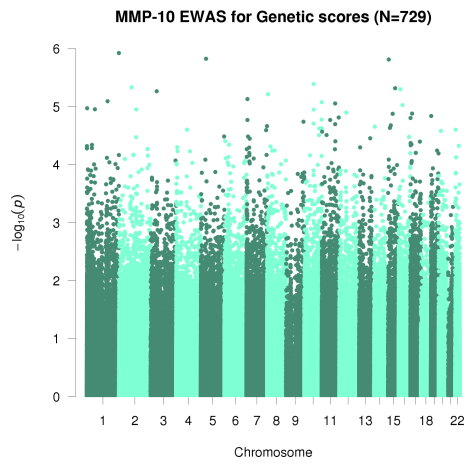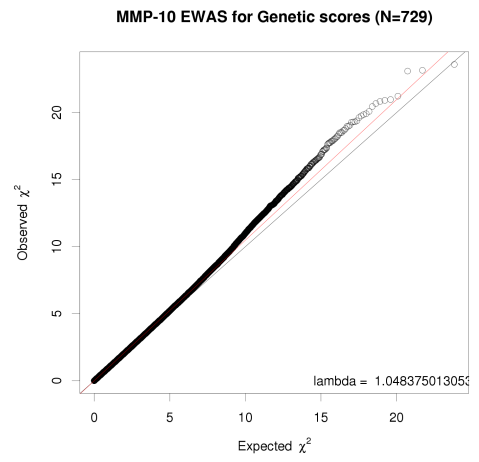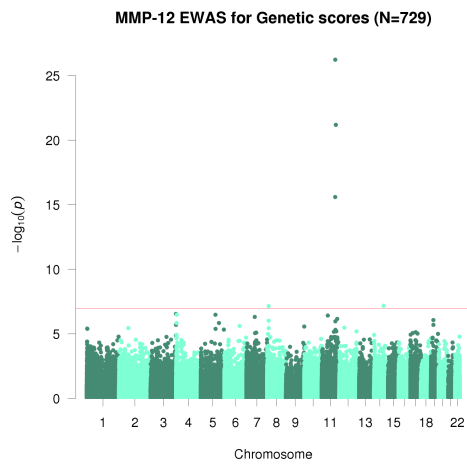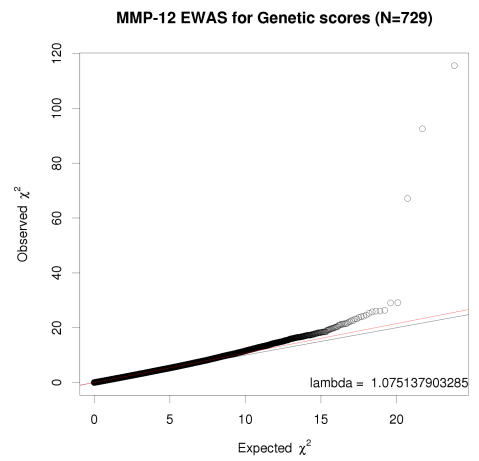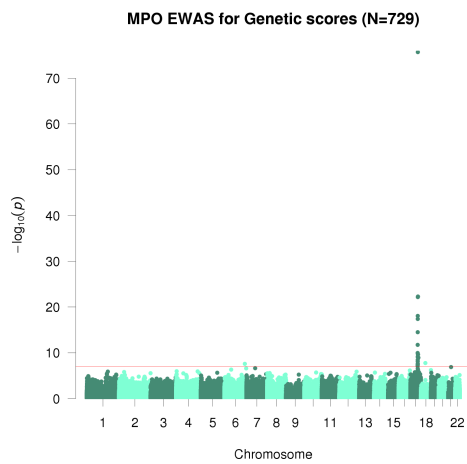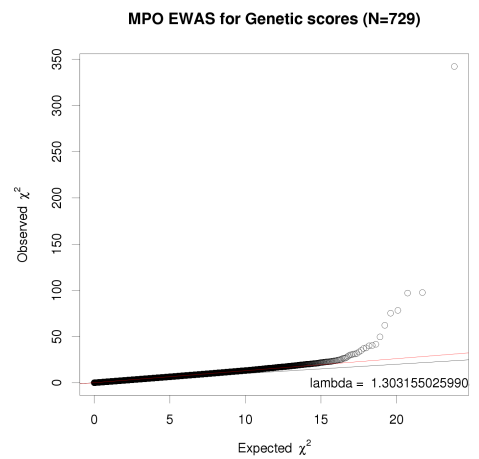



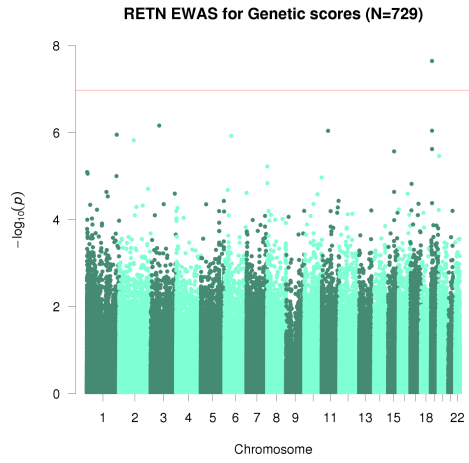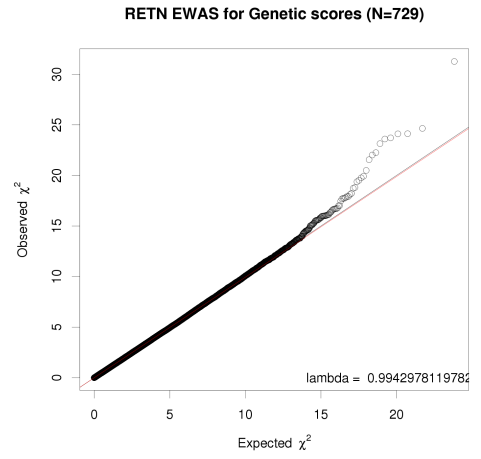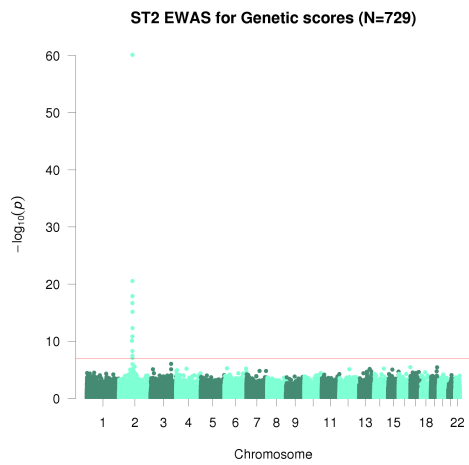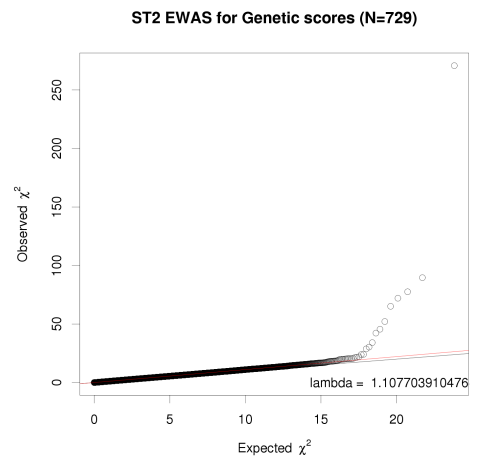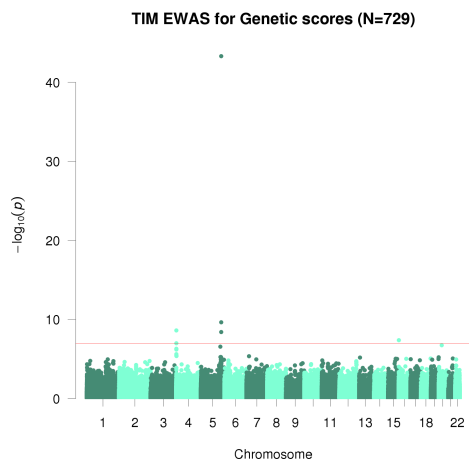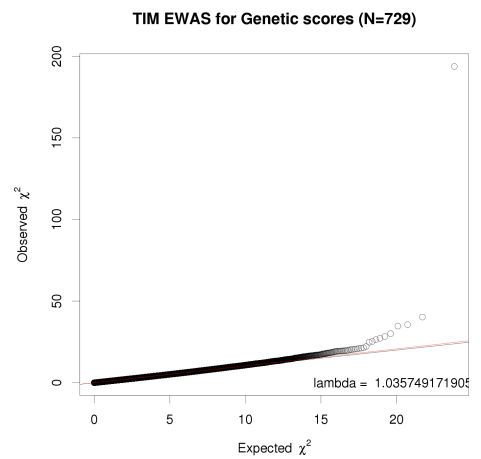

TM EWAS for Genetic scores (N=729)

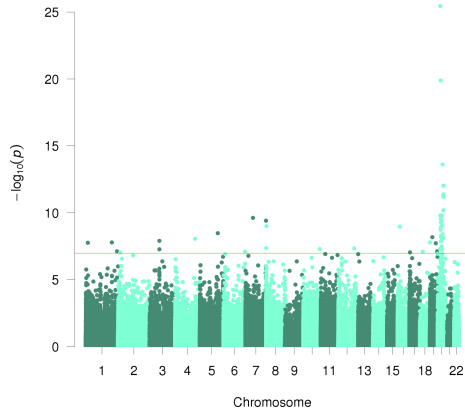

TM EWAS for Genetic scores (N=729)

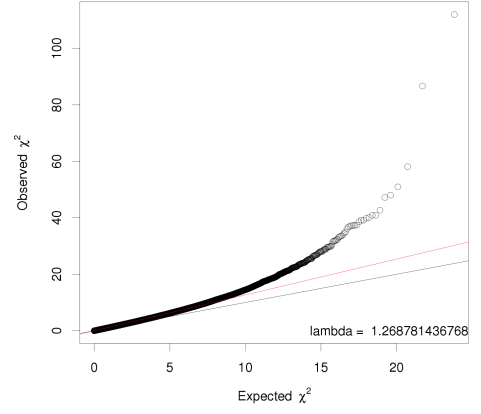

VEGFR-2 EWAS for Genetic scores (N=729)

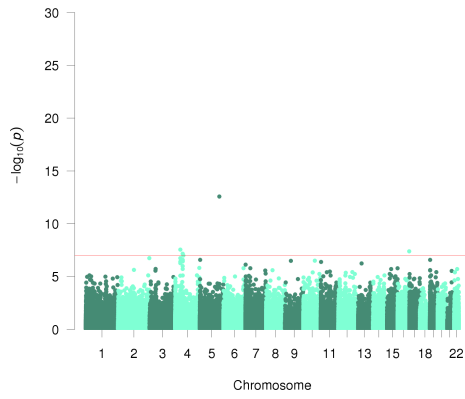

VEGFR-2 EWAS for Genetic scores (N=729)

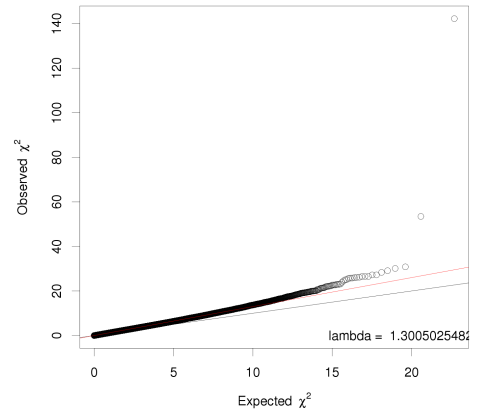

Supplement: pgen.1007005.s007.pdf [file pgen.1007005.s007.pdf]
