# Supplementary material for: The relative contribution of DNA methylation and genetic variants on protein biomarkers for human diseases
Source: PubMed Central journal article supplement (PMC5617224; doi:10.1371/journal.pgen.1007005), 2017-09-15

**S1 Fig.** A) Relationship tree, drawn for the biomarkers in this study, which clusters similar biomarkers based upon expression values. B) Principal component plot for the biomarkers in the study.

A

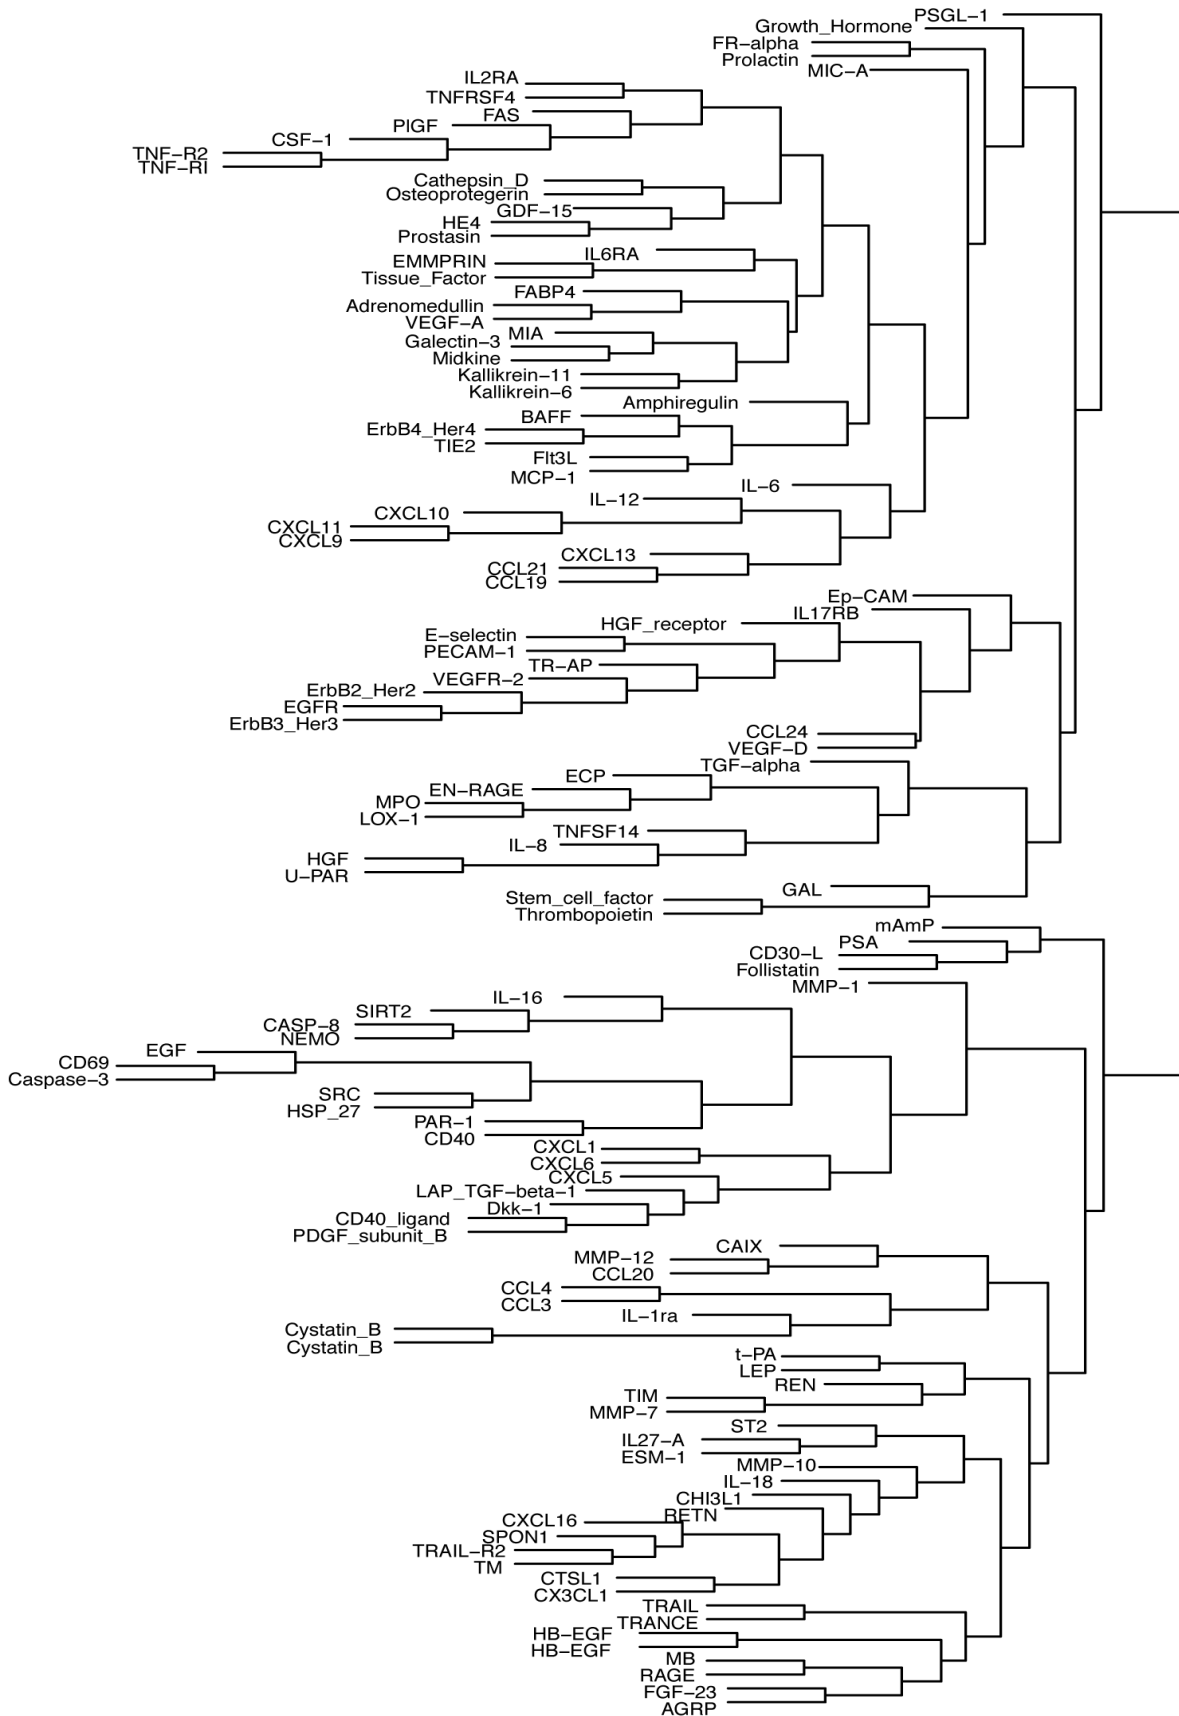

B

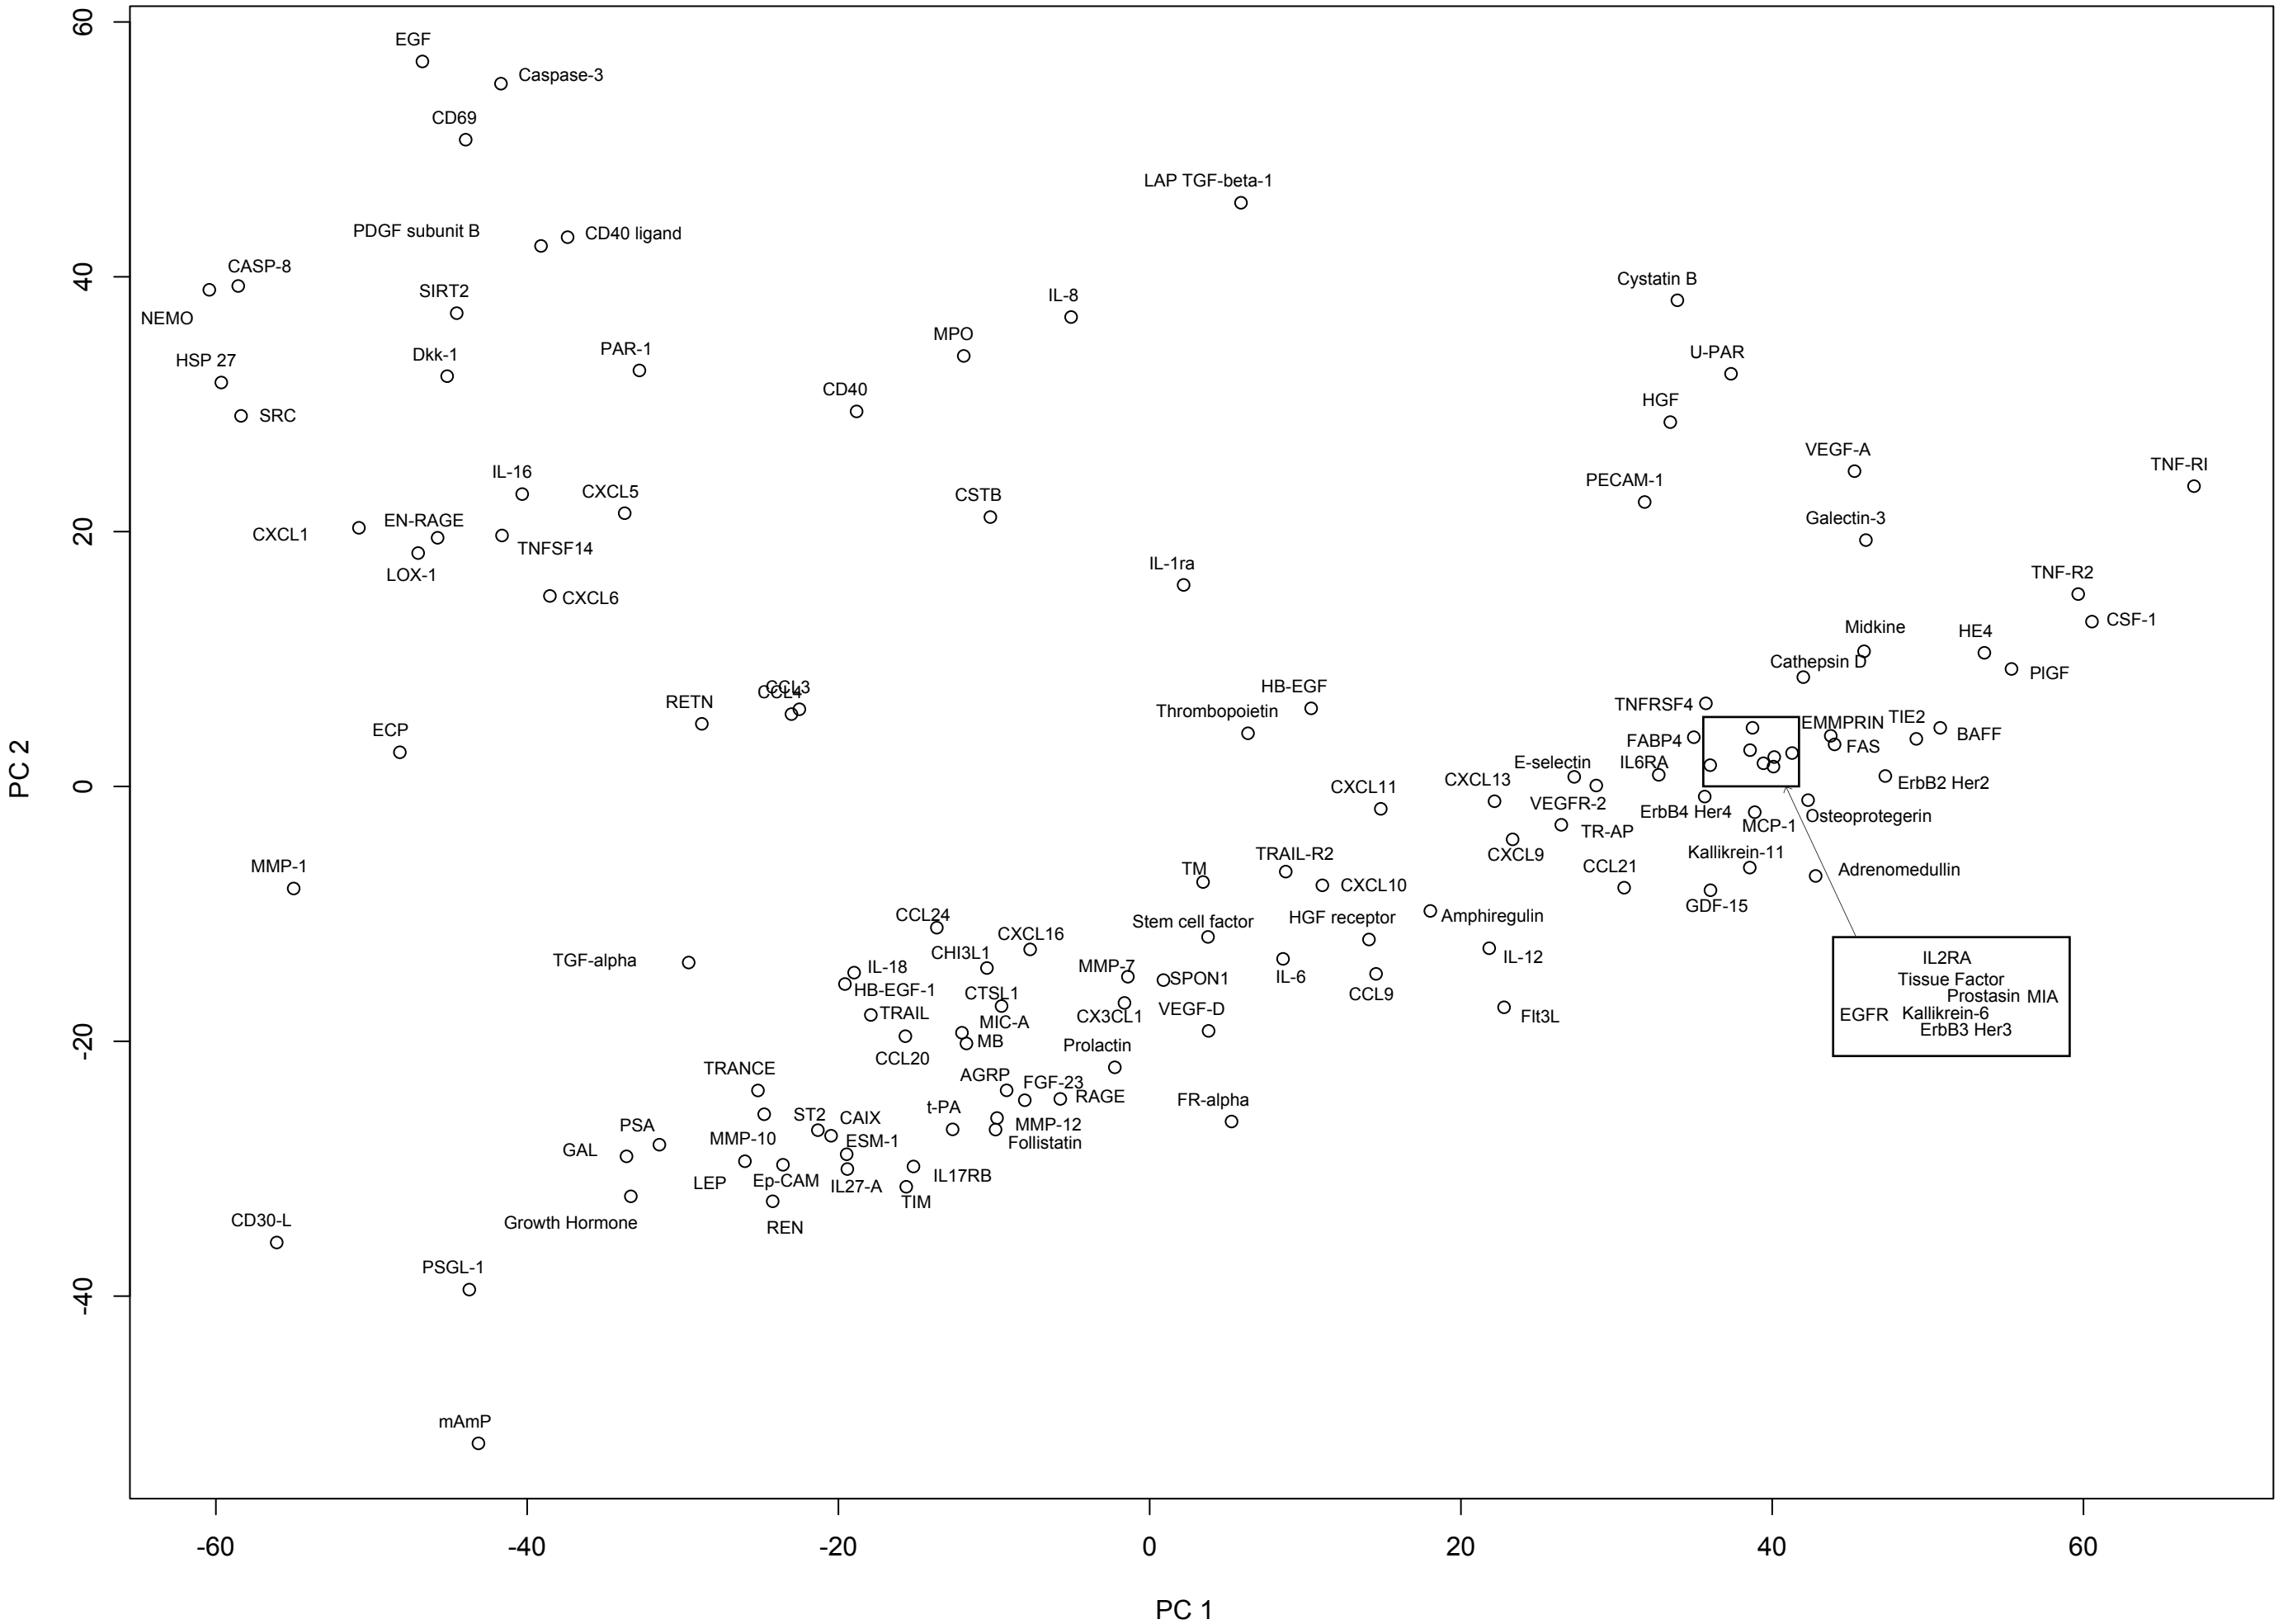

Supplement: pgen.1007005.s001.pdf [file pgen.1007005.s001.pdf]
