# Supplementary material for: The relative contribution of DNA methylation and genetic variants on protein biomarkers for human diseases
Source: PLoS Genet. 2017 Sep 15;13(9):e1007005. doi: 10.1371/journal.pgen.1007005 (PMC5617224; doi:10.1371/journal.pgen.1007005)
Supplement: S4 Table — (XLSX) [file pgen.1007005.s011.xlsx]

## Sheet: Supplemental Table S4
Supplemental Table S4. GWAS regions with significant hits
* Defined by first and last SNP +/- 1kb (hg19)
** Most significant SNP rs56398830 - Deleterious variant in SLC10A2
*** Rare variants (MAF<0.006) and borderline significant (P>=7.33E-10)
Biomarker	HGNC Symbol for gene encodign the biomarker	Location of gene (Build 37)	GWAS round	Significan after adjusting for the number of biomarkers tested	GWAS region (Chr:Position)*	Cis-regulatory	Trans-regulatory candidate gene
AGRP	AGRP	chr16:67516474-67517716	Primary	Yes	chr16:63815853-69453862	Yes
CCL19	CCL19	chr9:34689567-34691274	Primary	Yes	chr6:31738684-32714602	No	MHC class II genes
CCL24	CCL24	chr7:75440983-75452674	Primary	Yes	chr7:73139733-80598524	Yes
CCL24	CCL24	chr7:75440983-75452674	Secondary	Yes	chr7:73140733-77077233	Yes
CCL24	CCL24	chr7:75440983-75452674	Tertiary	Yes	chr7:75442407-75489038	Yes
CCL4	CCL4	chr17:34430983-34433014	Primary	Yes	chr3:45821010-47243923	No	Gene cluster (CCR1,CCR3, CCR5, CCR9, CCRL2, CXCR6)
CCL4	CCL4	chr17:34430983-34433014	Primary	Yes	chr17:34811273-34813273	400 kb downstream	CCL4
CD30-L	TNFSF8	chr9:117656003-117692697	Primary	No	chr11:126280047-126293961	No	ST3GAL4
CD40	CD40	chr20:44746911-44758502	Primary	Yes	chr20:44672546-44783161	Yes
CHI3L1	CHI3L1	chr1:203148059-203155877	Primary	Yes	chr1:203054101-203197757	Yes
CXCL10	CXCL10	chr4:76942270-76944650	Primary	Yes	chr4:64367965-80692563	Yes
CXCL5	CXCL5	chr4:74861359-74864496	Primary	Yes	chr4:74714179-74944189	Yes
CXCL5	CXCL5	chr4:74861359-74864496	Primary	Yes	chr10:64877118-65358438	No
CXCL6	CXCL6	chr4:74702214-74714781	Primary	Yes	chr4:74553069-74712842	Yes
Cystatin B	CSTB	chr21:45192393-45196326	Primary	Yes	chr21:45195945-45251839	Yes
E-selectin	SELE	chr1:169691782-169733846	Primary	Yes	chr9:136055956-136361704	No	ABO
Ep-CAM	EPCAM	chr2:47572297-47614740	Primary	Yes	chr13:103015738-105598971	No	SLC10A2**
Ep-CAM	EPCAM	chr2:47572297-47614740	Primary	Yes	chr2:48643973-67612509	1 Mb downstream	EPCAM
Flt3L	FLT3LG	chr19:49977464-49989488	Primary	Yes	chr13:24539610-24715100	No	SPATA13
Flt3L	FLT3LG	chr19:49977464-49989488	Primary	Yes	chr13:28604007-28762592	No	FLT3
Galectin-3	LGALS3	chr14:55590828-55612131	Primary	No	chr14:55659347-55661347	50 kb downstream	LGALS3
HSP27	HSPB1	chr7:75931861-75933612	Primary	Yes	chr7:75918995-75931759	Yes
IL-12	IL12B	chr5:158741791-158757895	Primary	Yes	chr5:158766155-158825380	Yes
IL17RB	IL17RB	chr3:53880607-53899827	Primary	Yes	chr3:53845617-54038536	Yes
IL2RA	IL2RA	chr10:6052652-6104288	Primary	Yes	chr10:3816561-6428932	Yes
IL6RA	IL6R	chr1:154377669-154441926	Primary	Yes	chr1:149755964-154665175	Yes
Kallikrein-11	KLK11	chr19:51525487-51531290	Primary	Yes	chr19:51490464-51528970	Yes
MCP-1	CCL2	chr17:32582237-32584222	Primary	No	chr3:46369803-46371803	No	Gene cluster (CCR1,CCR3, CCR5, CCR9, CCRL2, CXCR6)
MIA	MIA	chr19:41277553-41283395	Primary	Yes	chr19:41189885-41329516	Yes
MIC-A	MICA	chr6:31361303-31377758	Primary	Yes	chr6:28759302-33034420	Yes
MIC-A	MICA	chr6:31361303-31377758	Secondary	Yes	chr6:31321578-31424088	Yes
MIC-A	MICA	chr6:31361303-31377758	Tertiary	Yes	chr6:31407331-31407331	Yes
MMP-1	MMP1	chr11:102660651-102668891	Primary	Yes	chr11:102668230-102778551	Yes
MMP-10	MMP10	chr11:102641234-102651359	Primary	No	chr11:102648482-102662425	Yes
MMP-10	MMP10	chr11:102641234-102651359	Secondary	No	chr11:102649482-102661425	Yes
MMP-12	MMP12	chr11:102733467-102745764	Primary	Yes	chr11:102610332-106254245	Yes
MMP-7	MMP7	chr11:102391239-102401484	Primary	Yes	chr11:102395607-102402661	Yes
MMP-7	MMP7	chr11:102391239-102401484	Secondary	Yes	chr11:102396607-102401661	Yes
MPO	MPO	chr17:56347217-56358296	Primary	No	chr17:56816130-56818130	500 kb upstream	MPO
NEMO	IKBKG	chrX:153769414-153793261	Primary	No	chr8:97642451-100147901	No	No candidate gene***
PECAM-1	PECAM1	chr17:62396775-62491136	Primary	Yes	chr9:136054803-136361704	No	ABO
RETN	RETN	chr19:7733930-7735340	Primary	No	chr19:7618178-7620178	120 kb upstream	RETN
ST2	IL1RL1	chr2:102927962-102968497	Primary	Yes	chr2:102191078-103249843	Yes
Stem cell factor	KITLG	chr12:88886570-88974628	Primary	No	chr20:44550855-44558215	No	PCIF1/PLTP - lipid associated gene
TIE2	TEK	chr9:27109139-27230173	Primary	Yes	chr6:31323711-31325711	No	HLA-B
TIE2	TEK	chr9:27109139-27230173	Primary	Yes	chr9:136094770-136249480	No	ABO
TIM	HAVCR1	chr5:156456424-156486130	Primary	Yes	chr5:156229976-156483884	Yes
TM	THBD	chr20:23026270-23030378	Primary	Yes	chr20:23026413-23029724	Yes
TRAIL	TNFSF10	chr3:172223298-172241297	Primary	Yes	chr18:29107395-29773887	No	RNF138
VEGFR-2	KDR	chr4:55944644-55991756	Primary	No	chr4:55971946-55973946	Yes
VEGFR-2	KDR	chr4:55944644-55991756	Primary	No	chr9:136137765-136156000	No	ABO
VEGFR-2	KDR	chr4:55944644-55991756	Secondary	No	chr4:55972946-55972946	Yes
