# Supplementary material for: The relative contribution of DNA methylation and genetic variants on protein biomarkers for human diseases
Source: PLoS Genet. 2017 Sep 15;13(9):e1007005. doi: 10.1371/journal.pgen.1007005 (PMC5617224; doi:10.1371/journal.pgen.1007005)
Supplement: S9 Table — (XLSX) [file pgen.1007005.s016.xlsx]

## Sheet: Supplemental Table S9
Supplemental Table S9. Biomarkers with significant EWAS and GWAS hits.
SNP1, SNP2 and SNP3 are the significant GWAS SNPs that was included as covariates in the EWAS to test for independency between EWAS and GWAS hits.
Biomarker	SNP 1	SNP 2	SNP 3	Cis-regulatory
CCL19	rs2395201			No
CCL24	rs10755885	rs73359714	rs11465295	Yes
CCL4	rs333	rs113877493		Yes/No
CHI3L1	rs2153101			Yes
Cystatin B	rs35285321			Yes
Flt3L	rs145096717			No
IL-12	rs10076557			Yes
IL17RB	rs6445607			Yes
IL6RA	rs12133641			Yes
MIA	rs2279699			Yes
MIC-A	rs6938453	rs529790043(chr6:31402666)	rs2516470	Yes
MMP-12	rs150986675			Yes
NEMO	rs190361203			No
RETN	rs201458284			Yes
ST2	rs34644791			Yes
TIM	rs953568			Yes
TM	rs1042579			Yes
TRAIL	rs144242131			No
